# Supplementary material for: The carbon–iodine bond cleavage and isomerization of iodoform visualized with femtosecond X-ray liquidography
Source: Royal Society of Chemistry journal article supplement (doi:10.1039/d4sc04604h), 2024-01-01
Supplement: d4sc04604h2.zip [file d4sc04604h2.zip]

## Sheet: Fig 2a
-8.93625e-08	2.49204e-06	-6.29015e-06	-4.62805e-06	-8.76136e-06	1.53306e-07	7.74746e-06	1.23081e-05	3.68889e-06	6.74443e-07	-1.34957e-06	-1.21214e-06	-8.25819e-06	1.88194e-05	1.74307e-05	2.02308e-05	1.88284e-05	3.25311e-05	5.33712e-05	4.23669e-05	4.33639e-05	6.35789e-05	5.71617e-05	5.73925e-05	5.98176e-05	8.00006e-05	6.97789e-05	5.88304e-05	5.36104e-05	6.81147e-05	5.92604e-05	7.0649e-05	4.90212e-05	6.34127e-05	6.07733e-05	5.45416e-05	7.63342e-05	5.40493e-05	6.29533e-05	8.31495e-05	6.52126e-05	7.01675e-05	7.19465e-05	5.12649e-05	6.21648e-05	6.55065e-05	6.13565e-05	4.86183e-05	5.56552e-05	5.12491e-05
-2.15383e-06	1.13761e-05	-3.29945e-06	2.2769e-06	3.23548e-06	-1.23133e-06	1.97282e-06	-3.44081e-06	-1.28314e-05	4.24323e-06	-2.43654e-06	-8.01943e-06	-5.90306e-06	5.24998e-06	6.12101e-06	5.8895e-06	2.00014e-05	2.91136e-05	2.73294e-05	3.18949e-05	2.89094e-05	3.62104e-05	4.2553e-05	4.08036e-05	4.02914e-05	4.75518e-05	3.57566e-05	3.24138e-05	2.42378e-05	3.94823e-05	3.52516e-05	3.9524e-05	4.09018e-05	4.77527e-05	3.30798e-05	3.31109e-05	3.18415e-05	3.75069e-05	4.60429e-05	3.30983e-05	3.75031e-05	4.15864e-05	3.01563e-05	4.06395e-05	2.67036e-05	3.16488e-05	3.92795e-05	3.62109e-05	4.06457e-05	4.74567e-05
7.27314e-06	1.41511e-05	3.4275e-06	1.50818e-06	4.83024e-06	-1.46454e-05	4.06957e-06	-1.59778e-05	-7.59094e-06	8.6803e-06	3.7232e-06	2.60159e-06	5.41785e-06	1.19948e-06	9.21514e-06	8.81039e-06	2.00104e-05	1.26537e-05	2.33691e-05	3.00159e-05	2.41571e-05	3.07877e-05	2.88766e-05	2.88337e-05	3.3547e-05	3.29265e-05	2.67088e-05	3.44444e-05	2.85207e-05	3.57223e-05	2.39906e-05	2.81635e-05	3.2638e-05	3.33665e-05	2.54083e-05	3.45555e-05	2.47984e-05	1.86569e-05	2.01311e-05	1.49992e-05	2.14098e-05	2.15086e-05	1.87688e-05	3.12653e-05	1.56055e-05	1.67342e-05	2.08309e-05	2.7974e-05	2.63535e-05	2.97428e-05
4.01085e-06	1.46335e-06	-6.44622e-06	4.08989e-06	7.23523e-06	-6.15197e-06	-3.45541e-06	-5.43712e-06	5.81495e-06	4.88792e-06	4.04461e-06	-1.26432e-06	1.19105e-05	-5.97903e-06	-5.92654e-06	2.10382e-05	1.57808e-05	1.33229e-06	-6.87421e-07	2.12647e-05	1.53238e-05	1.24396e-05	1.58388e-05	1.09005e-05	1.79892e-05	1.20441e-05	1.3449e-05	1.71581e-05	2.06476e-05	6.2528e-06	1.22186e-05	4.97626e-06	1.79129e-05	7.32435e-06	1.73403e-05	1.73537e-05	2.33637e-05	7.09033e-06	-2.29683e-06	7.17697e-06	1.10047e-05	1.55438e-05	1.88965e-05	1.22907e-05	8.3073e-06	1.69576e-05	1.35367e-05	1.10664e-05	1.11934e-05	1.2827e-05
1.41388e-06	-1.72313e-05	-2.92405e-06	1.68709e-06	5.73382e-06	1.01164e-05	-9.0062e-06	8.94664e-06	3.98612e-06	-7.75324e-06	-6.06574e-06	-4.90642e-07	4.6626e-06	-3.00811e-06	-5.36383e-07	3.72963e-06	2.76611e-06	4.41353e-06	-1.30589e-05	-2.44026e-06	-1.33858e-06	-1.41122e-05	-1.01874e-05	-1.27434e-05	-1.26517e-05	-2.04105e-05	-1.30653e-05	-1.34488e-05	-1.20356e-05	-2.49956e-05	-9.80348e-06	-2.41975e-05	-1.46111e-05	-2.57846e-05	-1.07875e-05	-2.02513e-05	-1.94026e-05	-6.29734e-06	-1.30104e-05	-9.95482e-06	-1.14572e-05	-1.77284e-05	-3.25831e-06	-2.4128e-05	-8.50168e-06	-7.22877e-06	-1.22941e-05	-1.41524e-05	-1.159e-05	-1.90847e-05
-8.24909e-06	-1.34113e-05	9.22284e-06	-2.2499e-06	-7.99917e-06	9.43351e-06	4.60574e-06	6.18939e-06	7.97324e-06	-1.43284e-05	1.58841e-06	4.8804e-06	1.11491e-06	-7.20034e-06	1.58775e-05	-3.6661e-06	-8.394e-06	9.19731e-07	-3.23348e-06	-1.24946e-05	-8.83669e-06	-1.7628e-05	-2.13615e-05	-2.04945e-05	-2.66089e-05	-3.8082e-05	-3.42618e-05	-2.99651e-05	-2.24684e-05	-2.73666e-05	-2.90363e-05	-2.35499e-05	-3.37774e-05	-3.1106e-05	-3.68768e-05	-3.18612e-05	-3.6447e-05	-2.94476e-05	-2.58622e-05	-2.76352e-05	-2.44044e-05	-3.3262e-05	-3.06901e-05	-3.02261e-05	-1.85795e-05	-2.13976e-05	-3.53854e-05	-2.71971e-05	-3.18284e-05	-3.78095e-05
-4.0808e-06	5.27939e-06	1.186e-06	-1.59766e-06	-7.09991e-06	-1.62138e-06	1.41251e-08	-2.62676e-06	2.45735e-06	-6.63318e-06	7.64277e-06	-3.27709e-06	-2.65442e-06	9.36403e-06	3.67832e-06	-1.19099e-05	-1.13354e-05	-6.73586e-06	-1.12191e-05	-2.78509e-05	-1.41203e-05	-1.48196e-05	-2.68086e-05	-2.64777e-05	-3.06286e-05	-2.16888e-05	-3.00427e-05	-3.98014e-05	-2.61665e-05	-2.4338e-05	-2.80773e-05	-2.6115e-05	-3.21661e-05	-2.41886e-05	-3.18365e-05	-2.90305e-05	-3.39524e-05	-2.65612e-05	-3.67406e-05	-3.49824e-05	-3.71841e-05	-2.9097e-05	-3.95548e-05	-2.63764e-05	-1.75704e-05	-3.28376e-05	-2.93412e-05	-2.24868e-05	-2.81881e-05	-3.41742e-05
9.69558e-07	6.54222e-06	-7.81097e-06	-4.19598e-06	5.9413e-06	-3.44606e-06	-4.38722e-06	1.55703e-06	-2.7273e-06	9.67978e-06	-5.41518e-07	2.50599e-06	-1.11844e-05	6.12431e-06	-1.5322e-05	-1.53228e-05	-1.56156e-05	-1.39138e-05	-8.29827e-06	-1.93222e-05	-1.3058e-05	-7.8719e-06	-6.74412e-06	-8.2025e-06	-6.6888e-06	-2.14824e-06	4.86948e-06	-1.78247e-06	-7.69836e-06	5.48955e-06	-4.67186e-06	-3.27115e-07	2.63378e-06	1.11362e-06	2.17129e-06	4.07147e-06	9.2812e-06	4.46107e-06	-8.55798e-07	3.29371e-06	-1.21862e-06	2.46852e-06	-4.11538e-06	2.47391e-06	-1.21239e-05	-1.19008e-05	3.13657e-06	-3.13614e-06	3.86969e-06	9.5306e-06
4.48887e-06	-9.26869e-07	1.20429e-05	5.44701e-06	-8.31483e-06	5.98857e-06	3.35679e-06	-5.81031e-06	-7.94707e-06	1.14354e-05	-7.51836e-06	1.54798e-06	8.91383e-06	-1.05429e-05	-1.21495e-05	4.59328e-06	5.14154e-06	-9.60529e-06	3.19569e-07	1.20983e-05	-5.82021e-06	-7.77044e-06	2.88767e-06	1.74752e-05	1.06289e-05	6.34667e-07	9.29332e-06	2.48604e-05	7.91404e-06	-2.39789e-07	1.52769e-05	1.13293e-05	1.12367e-05	9.20989e-06	1.72137e-05	1.11721e-05	9.06593e-06	6.96237e-06	3.33248e-05	1.68187e-05	1.95457e-05	1.06688e-05	1.99831e-05	2.00915e-05	1.23082e-05	2.17436e-05	1.50746e-05	9.81783e-06	1.28528e-05	2.10424e-05
7.02789e-06	-2.60066e-06	-4.13593e-06	3.27753e-06	7.22678e-06	-2.78639e-06	-2.94804e-06	7.63553e-06	4.42415e-06	-1.23564e-05	-2.47258e-06	-7.21677e-06	-6.04026e-07	-1.07075e-05	3.46523e-06	9.65367e-06	1.17688e-05	1.36268e-05	-1.62727e-06	1.14079e-05	7.53354e-06	1.43264e-05	1.12728e-05	5.91539e-06	1.3952e-05	6.16034e-06	3.58443e-06	5.1634e-06	1.27695e-05	4.71961e-06	1.81532e-06	2.78563e-07	3.23808e-06	3.42074e-07	3.37502e-06	2.40081e-06	-4.46561e-06	2.63059e-06	-1.07876e-05	-1.02058e-05	2.11459e-06	1.70517e-06	1.89214e-06	-8.1849e-06	5.73512e-06	2.96055e-06	-9.59622e-06	7.13567e-06	-6.17658e-06	-3.36777e-06
-1.21615e-05	8.18546e-07	-8.89749e-06	-6.6453e-06	5.28557e-06	-4.5282e-06	2.94761e-06	-7.59725e-06	4.01608e-06	8.41396e-07	7.73815e-06	5.47667e-06	-8.9216e-07	1.81146e-05	1.83218e-05	4.18299e-06	2.34768e-07	3.6504e-06	8.43407e-06	6.94785e-06	1.92764e-05	1.38522e-05	1.02998e-05	-2.70085e-06	5.06666e-06	2.80893e-05	8.37463e-06	1.5706e-06	1.32985e-05	2.10393e-05	1.40954e-05	1.60251e-05	1.66632e-05	2.25121e-05	6.78478e-06	1.49669e-05	1.86186e-05	1.01266e-05	3.14675e-06	2.37546e-05	9.06793e-06	1.20783e-05	1.33854e-05	1.21407e-05	9.64024e-06	5.44949e-06	2.57784e-05	8.15086e-06	1.68062e-05	8.02414e-07
-9.34677e-07	2.2204e-06	5.67708e-06	-3.12353e-06	-6.06628e-06	-1.45752e-06	1.65264e-06	-1.47996e-06	-1.09115e-05	7.80457e-06	-2.2124e-06	2.77459e-06	3.87879e-07	1.52062e-06	-2.99199e-06	-8.377e-06	-7.86491e-06	-1.4862e-06	7.45376e-06	-4.52975e-06	-3.77509e-06	-1.12638e-05	-2.32171e-06	3.6136e-06	-7.75056e-06	-9.23603e-06	2.12453e-06	-4.84698e-06	-1.1147e-05	-3.68572e-06	-9.50869e-07	-2.37939e-06	-6.69873e-06	-7.89845e-06	-7.18695e-07	-7.00425e-06	4.5525e-06	1.41149e-06	1.06499e-05	1.04887e-06	5.36192e-07	-1.02611e-06	1.86291e-06	2.65015e-06	-4.34331e-06	2.51598e-06	-6.35747e-06	2.34187e-06	-2.43579e-07	4.84942e-06
1.24956e-05	3.3722e-06	2.19107e-06	6.97029e-06	-1.93324e-06	9.04684e-06	1.84108e-06	8.94284e-06	1.00779e-05	-5.1898e-06	-7.12337e-07	-9.25043e-06	-5.08729e-06	-1.11045e-05	-1.28791e-05	2.41258e-08	6.49084e-06	1.30876e-06	-4.51901e-06	-5.45024e-06	-1.79045e-05	8.34405e-06	-7.43343e-06	-1.83154e-07	4.34372e-06	-1.10852e-05	-5.00242e-06	2.10378e-06	-5.05709e-06	-1.51942e-05	-1.50706e-05	-6.16714e-06	-1.17543e-05	-8.72599e-06	-7.72823e-06	-3.27916e-06	-8.87279e-06	-1.06186e-05	-1.12507e-05	-1.6555e-05	-1.03869e-05	-5.90852e-06	-1.89269e-05	-1.33948e-05	-6.3867e-06	-4.69323e-06	-1.24981e-05	-1.45137e-05	-1.04537e-05	-5.7966e-06
-2.12052e-06	-9.56038e-06	-2.11663e-06	1.57312e-06	-1.62532e-06	4.1164e-06	-1.26514e-05	1.33921e-06	7.64631e-06	-6.42586e-06	-3.54116e-06	-5.14072e-07	3.01184e-06	-4.66088e-06	-1.33392e-06	4.88428e-06	-6.11852e-06	-1.48564e-06	-1.46342e-05	-5.12825e-06	3.50924e-06	-4.91262e-06	-8.11937e-06	-3.09389e-06	-4.41731e-06	-9.89317e-06	-1.18391e-05	4.29723e-06	6.25497e-06	-2.8459e-06	-5.95136e-06	-1.09351e-05	-1.22045e-07	-7.13928e-06	-5.41021e-06	-1.08865e-05	-2.53837e-05	-9.30465e-06	-1.18683e-05	-8.32354e-06	-5.51384e-06	-1.0628e-05	-4.41114e-06	-5.78919e-06	-4.29422e-07	-1.26408e-05	-1.01971e-05	-4.50362e-06	-9.54949e-06	-8.69426e-06
-1.09204e-05	-7.30935e-06	8.25387e-06	-3.62708e-06	-1.15239e-05	-5.63088e-06	4.39301e-06	-8.48683e-06	-3.06135e-06	-2.19928e-06	2.01748e-06	3.55642e-06	4.12217e-06	3.45597e-06	-2.04294e-06	-1.77033e-05	-9.88189e-06	-2.44224e-05	-1.83097e-05	-2.02393e-05	-1.26141e-05	-4.0014e-05	-2.70337e-05	-2.68924e-05	-3.70696e-05	-3.55838e-05	-2.81398e-05	-3.57123e-05	-3.49527e-05	-3.11883e-05	-1.94552e-05	-2.90135e-05	-2.71341e-05	-3.17059e-05	-2.79688e-05	-2.58714e-05	-2.84361e-05	-1.80801e-05	-2.39968e-05	-2.72283e-05	-2.54789e-05	-3.41177e-05	-2.6574e-05	-2.39347e-05	-2.74741e-05	-3.3374e-05	-2.842e-05	-2.56168e-05	-2.32783e-05	-2.43267e-05
-1.61897e-06	1.25697e-06	-3.96368e-06	-2.62825e-07	1.21213e-05	-1.93817e-06	1.70189e-07	3.11093e-06	-1.02854e-05	4.4646e-06	4.05967e-06	9.33288e-06	4.94772e-06	-2.99776e-06	-1.01444e-05	-2.40565e-05	-2.0634e-05	-3.35252e-05	-1.70659e-05	-2.86627e-05	-2.74942e-05	-4.52466e-05	-2.73822e-05	-4.0354e-05	-4.55182e-05	-4.37012e-05	-3.56859e-05	-5.18052e-05	-4.45042e-05	-3.30737e-05	-2.59442e-05	-2.70325e-05	-3.18859e-05	-2.92703e-05	-2.67181e-05	-2.16282e-05	-2.23668e-05	-1.89973e-05	-1.47737e-05	-2.46192e-05	-2.5568e-05	-2.46554e-05	-2.53008e-05	-1.6452e-05	-1.71921e-05	-2.33399e-05	-1.27885e-05	-1.44308e-05	-2.38474e-05	-1.71536e-05
-5.3066e-06	-2.01902e-06	1.75152e-06	3.66329e-07	1.21055e-05	5.15045e-06	-9.39931e-06	2.40854e-06	-6.97478e-06	1.12012e-06	1.43859e-06	5.03412e-06	-3.03934e-06	3.23206e-06	-9.22236e-06	-6.97155e-06	-2.09845e-05	-9.98568e-06	-1.52671e-05	-1.7182e-05	-2.27733e-05	-2.38978e-05	-1.79197e-05	-2.56808e-05	-1.98033e-05	-1.29643e-05	-1.48698e-05	-1.78073e-05	-1.30482e-05	-1.36399e-05	-3.4734e-06	-1.01676e-05	-7.39895e-06	-1.17148e-05	-3.79444e-06	-9.4327e-06	1.97182e-06	-5.64417e-06	5.05623e-06	-5.35968e-07	-6.27006e-06	-2.75503e-06	1.0964e-06	1.17127e-07	1.60672e-06	1.81163e-06	1.31233e-05	-4.76306e-06	2.5911e-06	-2.7407e-06
1.09878e-06	1.58065e-06	7.67591e-07	3.72395e-06	-4.61726e-06	1.26689e-05	-8.44561e-07	1.98662e-06	8.07025e-06	3.21539e-06	-5.58647e-06	-1.46569e-06	9.99022e-07	8.74683e-06	-8.47216e-06	-5.05992e-06	-1.50088e-05	-2.40201e-06	-1.47824e-05	-1.61862e-05	-1.78005e-05	-1.5447e-05	-2.02769e-05	-9.1031e-06	-3.31174e-06	-1.16678e-05	3.75038e-07	2.13057e-06	6.8749e-08	-1.20192e-05	-1.59563e-06	-1.25525e-05	-1.56106e-06	-4.91864e-06	-5.10676e-07	3.71841e-06	-1.88027e-06	-5.47693e-07	6.48599e-06	2.14043e-06	-2.60485e-06	-1.91616e-06	3.91094e-06	-1.98196e-06	-7.83154e-06	1.86874e-06	3.4614e-07	-2.60082e-06	1.32079e-06	-3.31541e-06
1.36233e-05	7.03209e-06	8.44663e-06	1.25582e-06	7.07824e-07	4.91139e-06	1.55547e-07	5.07959e-06	-3.39836e-06	5.85324e-07	-7.35213e-06	-6.65613e-06	2.71676e-07	3.28214e-06	-6.20803e-06	-1.15811e-05	9.43045e-07	-5.39101e-06	-5.98219e-06	-4.87799e-06	-1.20468e-05	-2.95434e-07	-5.14388e-06	3.86627e-07	3.11467e-06	2.88028e-07	7.86499e-06	7.95791e-06	4.66544e-06	2.24956e-06	4.81318e-07	7.05061e-06	8.26989e-06	9.94065e-06	1.13421e-05	1.07512e-05	3.4829e-06	9.1973e-06	9.18351e-06	1.59974e-05	5.5852e-06	-1.45817e-06	1.86111e-06	2.61284e-06	1.91716e-06	1.1842e-05	9.71821e-07	8.67879e-06	3.10486e-06	8.49274e-06
4.41233e-06	9.21358e-06	5.48318e-07	-2.28674e-06	4.23326e-06	-8.55778e-06	4.50495e-06	-3.87147e-06	-4.69711e-07	5.34304e-06	2.63755e-06	-2.39014e-06	-2.97906e-06	-7.614e-06	-2.82157e-06	-3.3032e-06	4.78331e-06	4.83552e-06	4.91436e-06	2.30094e-05	1.02741e-05	3.31033e-05	2.86448e-05	2.91284e-05	3.13327e-05	3.46816e-05	2.97801e-05	4.19013e-05	2.9077e-05	4.14587e-05	3.48058e-05	4.00135e-05	4.26304e-05	4.44542e-05	4.25573e-05	2.76681e-05	3.20315e-05	4.3464e-05	3.60441e-05	4.1798e-05	3.22774e-05	4.24876e-05	2.87212e-05	3.54194e-05	4.30199e-05	3.58391e-05	2.25842e-05	3.06059e-05	2.80592e-05	4.20521e-05
-4.81126e-06	7.00214e-06	-1.32022e-05	4.26081e-08	2.37214e-06	-9.1866e-06	8.75706e-06	-4.14966e-07	1.08716e-05	1.23429e-06	6.84174e-06	-3.12932e-06	-2.02771e-06	-5.05951e-06	-7.03001e-07	1.04594e-05	9.64919e-06	3.46484e-06	2.36411e-05	2.53297e-05	2.16288e-05	3.52752e-05	3.70921e-05	3.92833e-05	3.56468e-05	4.19007e-05	3.41867e-05	4.78289e-05	3.55503e-05	3.89773e-05	4.05432e-05	4.21821e-05	4.43397e-05	4.88806e-05	3.91178e-05	3.72012e-05	3.64901e-05	2.69195e-05	3.81925e-05	3.65399e-05	4.10233e-05	4.25638e-05	3.72002e-05	3.65533e-05	4.08887e-05	2.85931e-05	3.07537e-05	3.01887e-05	3.82728e-05	4.3212e-05
-4.23019e-06	2.61841e-06	-1.41204e-05	-1.4803e-06	-3.97226e-06	-1.10544e-05	1.06847e-05	9.60366e-07	3.50892e-06	-4.41538e-06	5.11408e-06	-2.20353e-06	-9.69901e-06	6.37749e-06	5.54528e-06	2.23454e-05	1.87942e-05	2.53072e-05	3.08862e-05	2.91769e-05	3.95089e-05	5.2777e-05	3.68917e-05	4.16557e-05	4.503e-05	5.16241e-05	5.00072e-05	4.76352e-05	4.74528e-05	5.68548e-05	4.64707e-05	5.10852e-05	4.47704e-05	4.49276e-05	4.65726e-05	4.99931e-05	4.78629e-05	3.74959e-05	4.21799e-05	3.52667e-05	5.31529e-05	4.00778e-05	4.57753e-05	4.1189e-05	4.22305e-05	3.48403e-05	4.45566e-05	3.68846e-05	4.28645e-05	4.34206e-05
1.37555e-06	-3.33693e-06	-9.22226e-06	-7.62726e-06	-1.30913e-05	-1.5142e-05	3.43652e-06	-6.51312e-07	-2.03691e-06	1.74333e-06	8.24507e-07	-6.12839e-06	-1.30317e-05	7.79827e-06	1.30264e-05	2.47317e-05	2.46065e-05	3.12188e-05	3.75565e-05	3.37204e-05	4.80939e-05	5.80536e-05	4.91115e-05	5.13824e-05	5.3448e-05	7.40355e-05	6.12461e-05	5.98107e-05	5.83732e-05	6.0456e-05	5.18855e-05	6.25337e-05	4.70297e-05	5.18917e-05	4.9331e-05	5.61685e-05	5.85784e-05	4.25655e-05	4.5445e-05	4.74454e-05	4.97595e-05	5.71149e-05	5.10346e-05	4.40923e-05	3.50782e-05	4.5996e-05	4.76602e-05	4.52351e-05	4.42218e-05	3.71907e-05
1.05511e-05	7.07941e-06	2.77987e-06	-9.72812e-06	-1.05497e-06	-1.07623e-05	4.97777e-06	-7.95691e-06	8.79404e-07	5.01278e-06	-3.81136e-06	-8.58445e-06	-7.21541e-06	2.71503e-06	1.82837e-05	2.55548e-05	3.4517e-05	3.57075e-05	4.34739e-05	4.53844e-05	5.80242e-05	6.2607e-05	6.45216e-05	6.84963e-05	7.30398e-05	8.17406e-05	7.51435e-05	6.1471e-05	6.86626e-05	6.70121e-05	6.28053e-05	7.163e-05	5.96302e-05	6.7562e-05	5.3548e-05	6.41007e-05	7.63124e-05	5.47375e-05	5.06473e-05	5.85299e-05	5.55641e-05	6.40137e-05	6.19952e-05	4.54849e-05	3.43925e-05	6.01617e-05	4.96615e-05	5.59619e-05	4.41508e-05	4.71011e-05
2.33944e-06	1.13853e-05	-1.72248e-06	-4.60436e-07	5.10246e-06	-1.16763e-06	5.91404e-06	-9.28693e-06	-5.81424e-06	5.37579e-07	-8.06979e-06	1.7044e-06	2.20886e-06	1.21216e-06	1.9682e-05	3.18389e-05	3.23627e-05	3.90495e-05	3.2391e-05	5.36434e-05	4.56074e-05	6.06857e-05	6.72776e-05	6.01302e-05	7.00895e-05	7.72309e-05	5.50259e-05	5.49686e-05	6.44589e-05	6.60231e-05	5.50432e-05	5.7306e-05	4.97034e-05	5.63383e-05	4.36784e-05	5.3523e-05	5.87045e-05	3.75309e-05	3.31035e-05	4.78378e-05	4.97328e-05	5.01379e-05	4.9678e-05	3.13155e-05	3.12474e-05	4.36092e-05	3.62277e-05	5.10567e-05	3.87857e-05	3.36594e-05
-1.0141e-06	1.52341e-06	1.29022e-06	-3.74422e-06	1.65915e-07	7.39195e-06	3.49258e-06	-6.8301e-06	-8.11554e-06	3.19397e-06	-9.70967e-06	3.92335e-06	2.51381e-06	-3.64629e-07	1.47209e-05	3.06489e-05	3.05426e-05	4.28568e-05	3.53364e-05	4.5994e-05	4.74727e-05	5.03595e-05	5.50294e-05	4.73513e-05	5.203e-05	6.39911e-05	4.25044e-05	4.33039e-05	6.00103e-05	5.72102e-05	3.75844e-05	4.84045e-05	3.25893e-05	4.08204e-05	3.31868e-05	3.03058e-05	3.2693e-05	2.76961e-05	2.15122e-05	2.89151e-05	3.88498e-05	3.46036e-05	3.51151e-05	2.93424e-05	2.47731e-05	3.42443e-05	2.62514e-05	3.09642e-05	2.61959e-05	1.85216e-05
9.62592e-08	-5.10987e-06	2.19216e-06	4.37413e-07	-7.26389e-06	3.26893e-06	-1.28115e-06	-5.55671e-07	-1.58266e-07	-2.13109e-06	-4.97136e-06	-2.04098e-06	-1.70053e-06	-1.32972e-05	2.48313e-05	2.49954e-05	2.8034e-05	3.30571e-05	3.11882e-05	3.4838e-05	3.91027e-05	4.54342e-05	4.62269e-05	4.20338e-05	4.45612e-05	4.95862e-05	3.37027e-05	3.48586e-05	4.51805e-05	4.0128e-05	1.9746e-05	2.96429e-05	2.56202e-05	2.69259e-05	2.40792e-05	1.20717e-05	2.49589e-05	1.54469e-05	5.35866e-06	1.96469e-05	2.75677e-05	2.39831e-05	2.72004e-05	2.16251e-05	2.10376e-05	2.65112e-05	1.45514e-05	1.87559e-05	2.42511e-05	6.00979e-07
-2.97489e-06	2.09638e-06	-2.27294e-06	9.04239e-09	1.3214e-06	-2.96669e-06	1.39522e-07	6.10372e-07	5.04558e-06	-2.39599e-06	3.64943e-06	-1.29627e-06	3.77621e-06	-4.10135e-08	2.41052e-05	1.7893e-05	2.5216e-05	2.79886e-05	2.67464e-05	3.13134e-05	2.96781e-05	3.87784e-05	3.98158e-05	3.61352e-05	3.9091e-05	3.8456e-05	2.90371e-05	3.01107e-05	2.92862e-05	2.19909e-05	7.97123e-06	1.52641e-05	1.98973e-05	1.89811e-05	8.8594e-06	9.43797e-06	2.16441e-05	1.13928e-05	-4.42484e-06	6.90314e-06	1.79188e-05	2.14815e-05	2.03598e-05	1.1978e-05	1.08235e-05	1.58263e-05	9.63367e-06	4.78683e-06	1.24027e-05	2.46511e-06
1.48632e-06	-3.07081e-07	-5.7155e-07	4.8178e-06	3.16649e-06	-4.22112e-06	4.94741e-06	1.57098e-06	3.24626e-07	-3.32678e-07	7.6439e-06	-4.58038e-06	8.93764e-06	7.54398e-06	1.90293e-05	8.68617e-06	1.91826e-05	2.32074e-05	2.2827e-05	2.91905e-05	2.39331e-05	2.81556e-05	2.43682e-05	2.37504e-05	3.09627e-05	2.39238e-05	1.46606e-05	1.97007e-05	9.4076e-06	1.11357e-05	2.78742e-06	6.37391e-06	9.07299e-06	5.28191e-06	8.60238e-07	2.33521e-06	5.14245e-06	2.8097e-06	-7.83329e-06	1.27655e-06	6.23653e-06	8.13895e-06	1.03945e-06	2.73782e-07	3.14988e-06	7.61453e-06	-1.37853e-06	5.1882e-07	-8.80004e-07	-7.2209e-07
-3.86002e-06	-3.44304e-06	2.2642e-06	4.22513e-06	-2.3567e-07	1.16372e-06	4.24776e-06	-9.99425e-07	-3.26597e-06	-3.04766e-06	6.52892e-06	4.98994e-06	1.14766e-06	5.89731e-06	1.99148e-05	6.52924e-06	2.17385e-05	2.75955e-05	2.04636e-05	2.02492e-05	1.86387e-05	2.3082e-05	1.30934e-05	1.8008e-05	2.2705e-05	1.19995e-05	4.64389e-07	1.56242e-06	-2.6549e-06	4.69306e-06	-1.79707e-06	5.37557e-07	-3.47072e-06	-3.61183e-06	-3.0904e-06	-7.16176e-06	-1.67231e-06	-4.0821e-06	-1.13606e-05	9.45145e-06	-3.24809e-06	-4.26785e-06	-6.72988e-06	-5.75931e-06	-4.80563e-06	3.14465e-06	-4.07136e-06	5.47158e-06	-8.18437e-06	-3.70692e-06
1.1395e-06	8.08491e-07	-1.67567e-06	3.29388e-06	3.68195e-06	1.16691e-06	-3.49933e-06	-3.4034e-06	2.71635e-07	-4.74442e-06	9.94826e-07	3.30591e-06	-3.30188e-07	3.2065e-06	1.96752e-05	1.30295e-05	1.83489e-05	1.72084e-05	1.4731e-05	1.89736e-05	1.65999e-05	1.49265e-05	1.01711e-05	4.41069e-06	1.81508e-06	8.55001e-06	-9.95334e-06	-1.11053e-05	-9.54062e-06	-2.95613e-06	-1.12286e-05	-1.21652e-05	-1.54959e-05	-1.41051e-05	-1.12592e-05	-1.29563e-05	-7.82678e-06	-1.59349e-05	-1.68834e-05	-4.65015e-06	-7.99061e-06	-7.983e-06	-7.76734e-06	-1.30328e-05	-9.82293e-06	-6.36087e-06	-7.4344e-06	-2.116e-06	-6.2888e-06	-1.3129e-05
4.9878e-06	-1.88772e-06	-2.34156e-06	-1.53559e-06	3.24893e-06	-2.82583e-06	-8.57005e-06	1.66478e-06	-2.14649e-06	-3.88696e-06	-2.18267e-06	-1.47422e-07	6.17926e-06	-3.62821e-07	9.02158e-06	1.27242e-05	6.96173e-06	8.61189e-06	5.8417e-06	1.21856e-05	1.69567e-06	-4.63494e-07	-5.38407e-06	-1.49534e-05	-1.60225e-05	-7.49533e-06	-2.00041e-05	-2.29461e-05	-1.7174e-05	-1.49203e-05	-2.83323e-05	-2.53794e-05	-2.26577e-05	-2.51019e-05	-3.45615e-05	-2.58826e-05	-2.73207e-05	-2.71217e-05	-2.69546e-05	-2.46075e-05	-2.53395e-05	-1.91103e-05	-2.14234e-05	-2.61435e-05	-2.69201e-05	-2.58857e-05	-2.1139e-05	-2.30333e-05	-1.41982e-05	-2.40886e-05
2.79901e-06	-5.40301e-06	-1.3426e-06	4.32644e-06	8.40752e-07	-1.49695e-06	-2.83238e-06	3.54054e-06	7.33778e-07	-4.92424e-06	3.22938e-06	-1.67514e-06	1.14569e-05	-6.40878e-06	6.26973e-06	7.01757e-06	3.16874e-06	1.91914e-06	3.05589e-06	3.37972e-06	-4.66167e-06	-1.71719e-05	-1.28185e-05	-2.44054e-05	-1.75743e-05	-2.17429e-05	-2.97014e-05	-2.49792e-05	-2.72788e-05	-2.73661e-05	-3.02778e-05	-3.36219e-05	-2.77651e-05	-3.11234e-05	-4.25502e-05	-2.97295e-05	-3.50655e-05	-3.42114e-05	-3.65019e-05	-3.60548e-05	-3.65516e-05	-2.75037e-05	-3.60782e-05	-2.91645e-05	-2.85752e-05	-3.34856e-05	-2.42889e-05	-2.92984e-05	-2.62461e-05	-2.65604e-05
6.19288e-06	-5.31143e-06	1.7825e-07	5.66311e-06	-6.11267e-06	-4.78725e-07	1.24197e-07	7.63297e-07	1.71709e-06	-4.29614e-06	2.77827e-06	4.20466e-06	1.36905e-05	-7.6795e-06	4.89479e-06	5.36116e-06	1.93223e-06	1.84123e-06	1.31292e-06	-1.5092e-06	-6.45368e-06	-1.77068e-05	-2.06999e-05	-2.90009e-05	-2.26276e-05	-3.17963e-05	-3.23808e-05	-2.79537e-05	-3.33458e-05	-2.61257e-05	-3.47834e-05	-3.28307e-05	-3.44689e-05	-4.15409e-05	-4.12534e-05	-3.89661e-05	-3.94014e-05	-3.94779e-05	-4.59993e-05	-4.54117e-05	-4.36292e-05	-3.22086e-05	-3.6362e-05	-3.02912e-05	-3.46054e-05	-4.19131e-05	-3.09726e-05	-3.44128e-05	-3.67451e-05	-3.0533e-05
1.4847e-06	-5.81318e-06	-4.16973e-06	-8.25668e-06	-9.99552e-06	9.35287e-07	-2.62136e-06	-1.52397e-06	-1.01677e-06	-6.05798e-06	2.58353e-06	-3.51473e-06	5.98724e-06	4.31103e-06	3.1897e-08	-2.84366e-06	-2.74692e-06	-7.47652e-07	6.44134e-06	-1.21265e-05	-9.92804e-06	-9.23873e-06	-2.3385e-05	-2.66817e-05	-3.3019e-05	-3.28694e-05	-3.70099e-05	-3.55871e-05	-3.46578e-05	-4.15949e-05	-4.20051e-05	-3.81963e-05	-4.12803e-05	-4.27312e-05	-4.07938e-05	-4.02334e-05	-4.35829e-05	-4.62715e-05	-4.24528e-05	-4.17127e-05	-4.64977e-05	-3.58845e-05	-3.86346e-05	-3.77182e-05	-3.42307e-05	-4.17666e-05	-3.69079e-05	-3.79205e-05	-3.68408e-05	-3.29686e-05
3.41314e-06	-3.20039e-06	-7.02062e-07	-7.74352e-06	3.27921e-06	-2.09406e-06	-3.27931e-06	2.88111e-07	-1.85583e-06	-1.18843e-06	-2.15684e-06	-2.08112e-06	-1.65229e-06	7.1482e-06	-7.39073e-07	-5.47658e-06	-7.81537e-06	-1.1276e-05	-4.29633e-06	-1.97727e-05	-2.20093e-05	-2.621e-05	-2.40843e-05	-3.67302e-05	-4.26444e-05	-4.25052e-05	-5.2315e-05	-4.3172e-05	-4.72157e-05	-5.45744e-05	-4.61983e-05	-5.32161e-05	-5.05427e-05	-4.5844e-05	-5.35834e-05	-4.91007e-05	-4.70378e-05	-5.30415e-05	-5.09364e-05	-4.19256e-05	-4.97387e-05	-4.61546e-05	-4.67785e-05	-5.32155e-05	-4.90246e-05	-3.91886e-05	-4.5893e-05	-4.74802e-05	-4.41898e-05	-4.43968e-05
3.65763e-06	-5.99085e-06	5.08567e-06	1.43901e-06	6.48999e-06	-4.96397e-06	-6.77388e-08	-1.04094e-06	1.85028e-06	9.64006e-07	1.54018e-07	-3.04357e-06	-5.15043e-06	3.0109e-06	-4.76629e-06	-7.40165e-06	-1.30633e-05	-1.97802e-05	-1.59048e-05	-2.41477e-05	-3.01677e-05	-3.53255e-05	-3.17699e-05	-4.58049e-05	-4.73832e-05	-4.93008e-05	-5.31604e-05	-5.41899e-05	-5.56538e-05	-5.09357e-05	-5.46063e-05	-5.97553e-05	-4.98795e-05	-4.94643e-05	-5.97741e-05	-5.19538e-05	-5.67422e-05	-4.92335e-05	-5.37359e-05	-5.00604e-05	-4.98497e-05	-5.26611e-05	-5.08723e-05	-5.71842e-05	-5.14438e-05	-4.48621e-05	-4.5278e-05	-4.7733e-05	-4.79396e-05	-5.486e-05
-7.54531e-06	-4.19633e-06	8.46879e-06	7.29647e-06	5.09802e-06	5.7626e-06	3.99252e-06	-3.47155e-06	1.24092e-05	-2.11934e-06	3.53662e-06	4.64665e-06	3.53162e-06	3.74837e-06	-4.99772e-06	-6.33897e-06	-1.64211e-05	-2.21188e-05	-2.36267e-05	-1.90554e-05	-2.56436e-05	-4.25498e-05	-3.98892e-05	-4.68899e-05	-4.79899e-05	-5.76299e-05	-4.9453e-05	-5.19838e-05	-5.24371e-05	-6.0487e-05	-5.30665e-05	-5.46327e-05	-5.14733e-05	-5.61166e-05	-5.61377e-05	-4.9261e-05	-6.03491e-05	-4.80261e-05	-4.71436e-05	-5.40115e-05	-5.08582e-05	-5.81512e-05	-5.60201e-05	-5.00241e-05	-4.7772e-05	-5.49413e-05	-4.96033e-05	-4.83985e-05	-4.14392e-05	-5.43984e-05
-5.93619e-06	-6.34152e-06	7.66117e-07	4.76113e-06	-4.58744e-06	-4.18785e-07	-5.92512e-06	-8.59174e-08	1.26939e-05	-1.01713e-06	-3.72864e-06	4.87318e-06	1.96717e-06	2.10927e-06	-7.13704e-06	-6.29684e-06	-2.38703e-05	-2.83751e-05	-3.59691e-05	-3.06525e-05	-3.15649e-05	-4.49017e-05	-4.62912e-05	-5.09459e-05	-5.98538e-05	-6.00552e-05	-5.46531e-05	-5.93867e-05	-5.99277e-05	-6.50051e-05	-5.64476e-05	-6.03995e-05	-6.37809e-05	-6.33728e-05	-5.62227e-05	-5.60455e-05	-6.47727e-05	-5.87433e-05	-5.59827e-05	-5.25681e-05	-5.5815e-05	-7.07784e-05	-5.66472e-05	-5.09879e-05	-5.31534e-05	-6.30813e-05	-4.84318e-05	-5.68618e-05	-4.67642e-05	-6.32064e-05
4.27995e-07	-7.44059e-06	-1.93229e-06	4.7702e-06	-7.61602e-06	1.12034e-05	-2.31591e-06	-6.0306e-06	8.14581e-06	-1.24642e-06	-2.26645e-06	-5.47741e-07	-9.9655e-07	-7.1681e-06	-1.00765e-05	-7.91444e-06	-2.67498e-05	-3.08796e-05	-3.73578e-05	-4.23679e-05	-4.09468e-05	-5.77952e-05	-5.88492e-05	-5.54677e-05	-6.81025e-05	-7.36841e-05	-6.21701e-05	-6.7842e-05	-7.18742e-05	-6.77186e-05	-6.76733e-05	-7.02808e-05	-7.459e-05	-6.5602e-05	-6.52977e-05	-6.70315e-05	-6.84646e-05	-6.07943e-05	-6.97904e-05	-6.01688e-05	-6.34033e-05	-7.04117e-05	-6.73266e-05	-5.36453e-05	-6.31105e-05	-7.12895e-05	-5.80192e-05	-6.37198e-05	-5.37229e-05	-6.40714e-05
5.82378e-07	1.02329e-06	5.73971e-07	2.7344e-06	-7.30682e-06	9.15828e-06	-1.94451e-06	-2.43181e-06	2.89852e-06	7.09226e-06	1.09736e-06	-2.55438e-06	2.05999e-07	-1.04065e-05	-7.51547e-06	-1.30553e-05	-2.54946e-05	-2.98884e-05	-4.44572e-05	-4.52678e-05	-4.94169e-05	-6.42696e-05	-6.59223e-05	-6.47116e-05	-7.36483e-05	-7.89898e-05	-6.76963e-05	-6.90744e-05	-6.57094e-05	-6.8422e-05	-7.34855e-05	-7.02671e-05	-7.47619e-05	-6.29808e-05	-6.4856e-05	-6.06565e-05	-6.58478e-05	-5.91383e-05	-6.87166e-05	-6.8008e-05	-5.61399e-05	-6.48041e-05	-6.21349e-05	-5.72502e-05	-5.79452e-05	-6.75606e-05	-5.65829e-05	-5.5062e-05	-6.03132e-05	-5.22762e-05
1.8216e-06	-2.44007e-06	-5.85974e-06	1.76159e-06	3.25225e-06	5.19317e-06	-5.8437e-06	-1.34056e-06	-3.24083e-06	2.22895e-06	9.97832e-07	-2.74048e-06	-4.12352e-06	-6.39836e-06	-1.0758e-05	-1.51262e-05	-3.00299e-05	-3.56794e-05	-5.06258e-05	-4.80123e-05	-5.0534e-05	-5.83848e-05	-6.40954e-05	-6.8076e-05	-7.16905e-05	-7.27239e-05	-6.34453e-05	-6.19977e-05	-5.81898e-05	-6.70529e-05	-6.39634e-05	-6.3022e-05	-6.49553e-05	-5.8767e-05	-5.60381e-05	-5.81619e-05	-6.00421e-05	-4.41762e-05	-6.02225e-05	-6.49303e-05	-6.09942e-05	-5.83384e-05	-5.14052e-05	-5.20942e-05	-4.58688e-05	-5.57416e-05	-5.20178e-05	-4.77448e-05	-5.50078e-05	-4.09771e-05
1.50341e-06	-3.13665e-06	-1.97652e-06	-8.69734e-07	-3.55518e-06	2.12849e-07	-6.48053e-06	5.28275e-06	-1.92339e-06	1.2925e-06	2.30239e-06	-5.45964e-06	-4.53069e-06	-2.02106e-06	-1.23544e-05	-1.6962e-05	-3.11073e-05	-3.27889e-05	-4.76524e-05	-4.94381e-05	-4.76938e-05	-5.20018e-05	-6.09959e-05	-5.8883e-05	-6.19023e-05	-6.10404e-05	-5.67215e-05	-5.60796e-05	-5.63719e-05	-6.2357e-05	-5.24567e-05	-5.28315e-05	-5.0225e-05	-5.50497e-05	-4.86674e-05	-5.28524e-05	-4.97094e-05	-3.83623e-05	-4.61842e-05	-5.68743e-05	-5.9452e-05	-5.10173e-05	-4.91592e-05	-4.62013e-05	-4.01857e-05	-4.83254e-05	-4.685e-05	-4.35878e-05	-4.79506e-05	-3.94814e-05
-5.24993e-07	1.66054e-06	6.08721e-06	-1.02389e-07	-5.79024e-06	-2.41644e-06	-2.5039e-06	-3.77149e-06	2.08127e-06	2.58567e-07	2.53881e-06	-4.74117e-06	-6.12683e-06	8.42021e-07	-1.60796e-05	-2.13449e-05	-3.13993e-05	-3.66474e-05	-4.43948e-05	-5.14077e-05	-4.8163e-05	-5.83901e-05	-6.13665e-05	-5.46677e-05	-6.91122e-05	-6.3734e-05	-6.11696e-05	-5.91062e-05	-5.70197e-05	-5.77237e-05	-5.80303e-05	-5.4939e-05	-5.25996e-05	-5.87168e-05	-4.64538e-05	-5.0661e-05	-4.73297e-05	-4.43676e-05	-4.61772e-05	-5.76609e-05	-5.8468e-05	-5.65572e-05	-5.72845e-05	-4.1322e-05	-5.26841e-05	-5.24335e-05	-4.98211e-05	-4.41799e-05	-4.63261e-05	-4.73802e-05
-1.13058e-05	8.81416e-07	4.94517e-06	2.16289e-06	-4.90042e-06	-3.80936e-06	-9.79065e-07	-4.1084e-06	1.86115e-06	-7.12067e-06	3.86585e-07	6.23791e-06	-1.74615e-06	-4.02113e-07	-1.59374e-05	-2.42267e-05	-2.96297e-05	-3.64092e-05	-3.88943e-05	-5.09549e-05	-4.53987e-05	-5.87928e-05	-5.6887e-05	-5.64916e-05	-6.3952e-05	-6.45558e-05	-6.14857e-05	-5.73284e-05	-5.31889e-05	-5.40134e-05	-5.77411e-05	-5.34057e-05	-4.92954e-05	-5.25709e-05	-5.14961e-05	-4.59058e-05	-4.92297e-05	-4.58399e-05	-4.17787e-05	-5.07819e-05	-5.5142e-05	-5.22066e-05	-5.31654e-05	-4.15016e-05	-4.58917e-05	-4.302e-05	-4.54544e-05	-4.28314e-05	-4.24716e-05	-5.10823e-05
-7.54954e-06	2.45019e-06	2.01891e-07	-4.0664e-06	-3.65315e-06	5.33987e-07	-2.35693e-06	3.63325e-06	-3.94957e-06	-2.60061e-06	-5.18429e-06	1.06288e-05	-3.86447e-06	-1.17203e-05	-9.59935e-06	-2.01808e-05	-2.85143e-05	-3.1779e-05	-3.97557e-05	-4.87361e-05	-4.52821e-05	-5.41984e-05	-5.39666e-05	-5.24853e-05	-5.62253e-05	-5.64852e-05	-6.10617e-05	-5.27232e-05	-4.58988e-05	-5.00145e-05	-4.75338e-05	-4.54105e-05	-3.85748e-05	-4.5774e-05	-5.03129e-05	-4.11227e-05	-4.61525e-05	-4.01392e-05	-4.04089e-05	-4.38016e-05	-4.63297e-05	-3.92108e-05	-4.03267e-05	-4.54521e-05	-3.50013e-05	-3.64816e-05	-3.97374e-05	-3.702e-05	-4.23071e-05	-4.08817e-05
-4.32259e-06	-3.45555e-06	2.56289e-06	-6.47409e-06	-3.19607e-06	5.57152e-06	-2.58606e-06	7.35963e-06	-3.51687e-06	-2.69445e-06	-6.36714e-06	7.18878e-06	-6.02564e-07	-8.87108e-06	-8.02598e-06	-2.08529e-05	-3.31965e-05	-3.16116e-05	-4.34153e-05	-4.67116e-05	-5.04107e-05	-6.1226e-05	-5.5295e-05	-5.16722e-05	-5.96812e-05	-6.07734e-05	-5.74236e-05	-4.91032e-05	-4.27763e-05	-5.12494e-05	-4.13444e-05	-3.78449e-05	-3.70949e-05	-4.4237e-05	-4.37339e-05	-4.63135e-05	-4.18169e-05	-4.1069e-05	-3.64084e-05	-3.46146e-05	-3.42082e-05	-3.53472e-05	-3.29333e-05	-4.10052e-05	-2.61674e-05	-3.72718e-05	-3.52338e-05	-3.05247e-05	-3.31415e-05	-3.75348e-05
-1.51492e-06	-1.04923e-05	6.61247e-06	-7.91272e-06	-2.67561e-06	1.00433e-05	-1.55174e-06	2.85415e-06	-5.98082e-06	-1.54673e-06	-2.59028e-06	1.06771e-05	1.35525e-06	-5.6978e-06	-1.22356e-05	-2.42456e-05	-3.18619e-05	-3.22549e-05	-3.73781e-05	-4.39418e-05	-4.63879e-05	-5.48468e-05	-5.37283e-05	-4.59478e-05	-4.93217e-05	-5.37131e-05	-4.42612e-05	-3.68763e-05	-3.5062e-05	-3.97285e-05	-2.45347e-05	-3.30513e-05	-2.47558e-05	-3.58323e-05	-2.7249e-05	-3.33599e-05	-3.08409e-05	-2.60556e-05	-2.4931e-05	-2.70293e-05	-2.49808e-05	-3.22659e-05	-2.29778e-05	-1.9966e-05	-1.47644e-05	-2.74754e-05	-2.23332e-05	-2.2962e-05	-2.32444e-05	-2.79354e-05
3.23287e-06	-9.37035e-06	-2.56245e-06	-1.99724e-06	-7.20088e-07	5.2184e-06	5.88795e-06	4.18633e-06	-2.58327e-06	-1.58948e-06	-2.25541e-06	1.08241e-06	1.42518e-06	-8.39689e-06	-1.5387e-05	-2.28861e-05	-2.6941e-05	-3.40558e-05	-3.46023e-05	-4.38213e-05	-4.1292e-05	-4.59733e-05	-4.77094e-05	-4.04562e-05	-3.71827e-05	-4.59062e-05	-2.83813e-05	-3.47222e-05	-2.74097e-05	-3.0289e-05	-1.34649e-05	-2.33282e-05	-2.24825e-05	-2.25443e-05	-1.48888e-05	-2.18855e-05	-2.66809e-05	-1.30477e-05	-1.45928e-05	-1.9325e-05	-2.26852e-05	-2.62101e-05	-2.10939e-05	-1.27485e-05	-9.19451e-06	-1.82094e-05	-1.88472e-05	-2.56769e-05	-2.49105e-05	-1.37046e-05
3.40544e-06	-2.06193e-06	-2.74297e-06	2.8032e-06	3.51602e-06	-1.12778e-06	2.11919e-06	2.91508e-06	-4.08394e-06	3.9679e-07	-2.02108e-06	-2.34652e-06	-5.29741e-06	-9.9877e-07	-1.63441e-05	-2.03172e-05	-2.93472e-05	-3.45186e-05	-3.49301e-05	-3.63708e-05	-3.63217e-05	-3.71763e-05	-4.28313e-05	-3.73703e-05	-3.11369e-05	-3.51312e-05	-2.69195e-05	-3.06316e-05	-2.19164e-05	-1.87557e-05	-7.88523e-06	-2.22269e-05	-1.74303e-05	-1.02099e-05	-5.69873e-06	-1.07356e-05	-2.18565e-05	-1.39514e-05	-7.76796e-06	-1.27828e-05	-1.07652e-05	-1.66778e-05	-1.21736e-05	-1.00458e-05	-8.00971e-06	-1.67325e-05	-1.32295e-05	-1.113e-05	-2.11519e-05	-9.56947e-06
-7.1585e-06	-3.89373e-06	1.82434e-06	-2.39693e-06	-4.87302e-07	2.41984e-06	2.45658e-08	2.5618e-06	-2.30292e-06	-5.70829e-07	-5.07809e-06	-3.80104e-07	-2.57543e-07	-9.18723e-08	-2.2401e-05	-2.01232e-05	-2.60355e-05	-4.27461e-05	-3.65449e-05	-3.63246e-05	-3.77379e-05	-3.8061e-05	-3.55971e-05	-2.77752e-05	-2.81803e-05	-3.46651e-05	-2.15319e-05	-2.28515e-05	-1.49614e-05	-1.78864e-05	-1.19489e-05	-2.19328e-05	-1.14109e-05	-9.76583e-06	1.30553e-07	-1.08548e-05	-1.6749e-05	-1.38134e-05	-3.74877e-06	-8.01167e-06	-1.25225e-05	-9.96064e-06	-4.79818e-06	-1.06859e-05	-6.25445e-06	-1.39994e-05	-5.34861e-06	1.9497e-07	-1.02359e-05	-6.28563e-06
-1.65343e-06	-6.76286e-07	1.30144e-06	-2.23692e-06	1.08917e-06	3.66182e-06	-3.37787e-06	-1.72663e-06	-6.8693e-07	-5.21034e-07	-6.61422e-07	7.61214e-06	-2.9999e-06	-4.85364e-06	-2.08003e-05	-2.23323e-05	-2.16755e-05	-3.84434e-05	-2.81265e-05	-2.96916e-05	-3.74122e-05	-3.64696e-05	-3.05923e-05	-1.54998e-05	-2.58999e-05	-3.24734e-05	-1.48058e-05	-1.07041e-05	-1.35963e-05	-1.68492e-05	-7.20756e-06	-7.25416e-06	-1.10011e-05	-1.05121e-05	6.97321e-07	-5.08587e-06	-7.61799e-06	-6.29446e-06	1.60179e-06	-5.2209e-06	-4.79978e-06	-1.0267e-05	-4.24222e-06	-4.08569e-06	-3.35102e-06	-7.90891e-06	-4.23788e-06	-6.06831e-06	-6.29979e-06	-5.15138e-06
3.68951e-06	-6.29053e-06	-8.65574e-06	9.74432e-07	-2.65227e-06	4.49695e-06	-2.56885e-06	-3.24593e-06	3.30571e-06	3.86369e-06	2.32346e-07	7.54792e-06	-1.76148e-06	-3.89185e-06	-1.13025e-05	-1.37506e-05	-1.90454e-05	-2.91598e-05	-3.01314e-05	-2.50114e-05	-2.31154e-05	-2.9913e-05	-2.63386e-05	-1.19515e-05	-2.04495e-05	-1.92416e-05	-3.08818e-06	-1.02314e-06	-4.68557e-06	-9.91624e-06	4.12302e-06	6.99048e-06	-1.05248e-06	-3.91397e-06	3.94161e-06	-9.07133e-07	2.11775e-06	7.63061e-06	1.3045e-05	8.9109e-08	1.84368e-06	-5.08804e-06	-5.46188e-07	7.91695e-06	2.14304e-06	-2.79709e-06	-2.09035e-06	-1.1319e-06	-1.31151e-06	-1.72598e-06
1.45857e-06	-1.74864e-06	-2.55295e-06	2.53979e-06	8.28286e-07	-1.42016e-06	-5.06774e-06	-2.24782e-06	4.95411e-06	1.90156e-06	9.95434e-08	-2.53253e-07	1.38514e-06	-4.62212e-06	-1.29966e-05	-1.42217e-05	-1.35011e-05	-2.16733e-05	-2.50007e-05	-2.19696e-05	-1.34808e-05	-1.69547e-05	-1.53463e-05	-5.91376e-06	-2.00108e-06	1.16398e-06	6.45522e-06	8.65152e-06	8.73494e-06	4.96994e-06	1.47711e-05	1.23623e-05	1.37195e-05	4.47679e-06	1.87316e-05	1.43824e-05	9.13512e-06	2.28253e-05	2.20495e-05	1.21803e-05	1.20576e-05	8.85772e-06	1.42966e-05	1.18748e-05	1.31467e-05	8.47554e-06	1.1282e-05	1.31391e-05	6.56196e-06	1.00083e-05
-1.38689e-07	-1.86483e-06	2.13747e-07	1.48098e-06	5.84653e-07	-3.72509e-06	-8.8106e-06	1.35144e-06	2.44224e-06	-5.13609e-06	1.17837e-06	-3.26594e-06	-2.13596e-06	-4.47299e-06	-1.33977e-05	-1.62916e-05	-1.12703e-05	-1.85041e-05	-1.77865e-05	-2.04521e-05	-1.56888e-05	-1.1353e-05	-1.13764e-05	-6.80766e-06	-2.48063e-06	-1.12916e-06	2.41565e-06	3.71036e-06	7.43747e-06	3.25505e-06	1.44767e-05	3.00629e-06	1.32123e-05	5.68904e-06	1.37143e-05	1.6573e-05	5.34048e-06	2.03749e-05	1.88136e-05	1.264e-05	1.09875e-05	9.3775e-06	6.58627e-06	1.05743e-05	1.42641e-05	5.15562e-06	1.44878e-05	1.48159e-05	2.28245e-06	9.02324e-06
-1.79874e-06	-4.01373e-06	-2.52101e-07	-3.92379e-06	8.04681e-07	4.94533e-08	-6.11475e-06	-4.15725e-06	2.13113e-07	-1.00106e-06	1.19218e-06	-1.81841e-06	-4.42841e-06	-5.8453e-06	-8.89226e-06	-1.70829e-05	-1.06038e-05	-1.63552e-05	-1.6712e-05	-1.22928e-05	-1.31544e-05	-8.55835e-06	-3.11456e-06	-8.14553e-07	1.86276e-06	5.04692e-06	7.25208e-06	1.16451e-05	8.06989e-06	1.32979e-05	2.43503e-05	1.55946e-05	1.62972e-05	1.44974e-05	1.37229e-05	2.26993e-05	1.2353e-05	1.95109e-05	2.33363e-05	1.85679e-05	1.48902e-05	9.8236e-06	1.45985e-05	1.75088e-05	1.66239e-05	1.48338e-05	1.97282e-05	1.94629e-05	1.00031e-05	1.53817e-05
-5.20677e-06	-6.91819e-06	2.00289e-06	-5.88525e-06	3.34474e-06	1.42961e-06	-2.85002e-06	3.39051e-07	-6.6169e-06	1.99446e-06	4.99995e-07	-2.27639e-07	-2.89074e-06	-6.96338e-06	-1.20024e-05	-1.45934e-05	-1.10516e-05	-8.9092e-06	-1.05502e-05	-8.31881e-06	-6.28685e-06	-4.55969e-07	3.95552e-06	9.21097e-06	9.73243e-06	1.74715e-05	1.80298e-05	2.38736e-05	2.20625e-05	2.35598e-05	2.91239e-05	2.96093e-05	2.92495e-05	2.44166e-05	3.09561e-05	2.6991e-05	2.16193e-05	2.73325e-05	3.55872e-05	2.92824e-05	2.41608e-05	2.07778e-05	2.2025e-05	2.77687e-05	2.37413e-05	2.23425e-05	2.81835e-05	2.37395e-05	2.04338e-05	2.15243e-05
-5.42317e-06	-2.25146e-06	9.25566e-06	-8.79125e-07	1.40584e-06	7.76005e-07	2.83184e-06	6.9815e-06	-5.25344e-08	-1.03359e-06	-3.50767e-06	5.04539e-06	-2.54324e-07	-7.72986e-06	-1.11938e-05	-1.01939e-05	-1.37118e-06	1.63766e-06	-1.8851e-06	-4.1937e-06	8.00814e-07	6.56021e-06	1.52983e-05	2.08911e-05	2.53497e-05	2.41694e-05	3.12689e-05	3.69147e-05	3.96293e-05	3.52684e-05	3.96873e-05	3.11465e-05	3.90138e-05	3.71547e-05	4.05067e-05	3.28281e-05	3.5871e-05	3.44527e-05	4.23695e-05	3.93985e-05	3.91758e-05	3.7845e-05	3.28972e-05	3.10527e-05	3.62399e-05	4.11505e-05	3.21969e-05	2.71086e-05	2.72941e-05	3.3499e-05
-1.76648e-06	2.09553e-07	7.71854e-06	-3.34316e-06	-2.40193e-06	5.21974e-07	5.76225e-06	4.94233e-06	3.79517e-06	1.64959e-06	6.22792e-08	-1.20179e-06	-3.74118e-06	-6.31017e-06	-1.14615e-05	-1.12294e-05	1.28673e-06	2.66259e-07	2.36323e-06	-3.32387e-06	4.67041e-06	9.20631e-06	1.53397e-05	2.13968e-05	2.69754e-05	2.38585e-05	3.63585e-05	3.55817e-05	3.53347e-05	3.17804e-05	4.77391e-05	3.55101e-05	3.68149e-05	3.9937e-05	3.9653e-05	3.87429e-05	4.1728e-05	4.0904e-05	4.33223e-05	3.6792e-05	4.24893e-05	3.54975e-05	3.43515e-05	2.9682e-05	3.71381e-05	4.07595e-05	3.59896e-05	2.54809e-05	3.30904e-05	4.23984e-05
-3.34874e-06	-3.19453e-06	4.56618e-06	2.53867e-06	8.29785e-07	1.03107e-06	3.28879e-06	7.2255e-06	-3.91112e-06	4.74348e-06	1.59993e-06	1.55752e-06	-8.62762e-06	-2.5866e-07	-1.13324e-05	-1.19458e-05	-1.38018e-07	2.70576e-07	7.32284e-06	2.19406e-06	7.79559e-06	1.12153e-05	2.00113e-05	2.2454e-05	2.80471e-05	2.48369e-05	3.72966e-05	3.74064e-05	3.16778e-05	2.79646e-05	4.79689e-05	3.13438e-05	3.90029e-05	3.79374e-05	4.16387e-05	4.284e-05	4.00403e-05	4.01181e-05	4.45728e-05	3.7349e-05	4.05524e-05	3.63152e-05	3.41456e-05	3.66413e-05	3.59642e-05	3.76663e-05	3.49145e-05	2.7703e-05	3.39076e-05	4.20052e-05
-4.81298e-07	-3.16893e-06	2.41195e-06	1.55158e-06	-3.60189e-06	-2.68849e-06	-4.84178e-06	4.67105e-06	-7.072e-07	-4.56532e-07	-3.73558e-07	-1.6521e-06	-4.45832e-06	1.68217e-06	-1.13142e-05	-8.52229e-06	-5.71544e-06	6.30661e-06	7.51135e-06	1.12027e-05	1.67303e-05	1.92995e-05	2.71319e-05	3.06052e-05	3.29891e-05	3.09144e-05	3.70332e-05	4.44363e-05	3.74975e-05	3.2408e-05	4.37164e-05	3.8841e-05	4.64651e-05	3.94808e-05	4.80041e-05	4.34155e-05	4.19322e-05	4.86248e-05	5.16977e-05	4.13731e-05	4.40639e-05	4.38743e-05	4.01033e-05	4.58098e-05	3.95785e-05	4.19568e-05	3.86283e-05	3.68469e-05	3.98472e-05	4.1083e-05
-2.44841e-06	3.39347e-06	4.95709e-06	2.03332e-06	4.00409e-06	-1.02949e-06	-8.56961e-06	5.398e-06	6.61819e-07	-2.23223e-07	-7.18374e-06	1.39624e-06	1.07219e-06	2.45134e-06	-9.18608e-06	-7.3324e-06	7.40439e-07	8.15909e-06	9.8412e-06	1.48885e-05	1.74982e-05	2.56966e-05	3.526e-05	3.84913e-05	3.92751e-05	4.10067e-05	4.48596e-05	4.83299e-05	4.53818e-05	4.42185e-05	4.79836e-05	4.69777e-05	5.31347e-05	4.58811e-05	5.2132e-05	4.70862e-05	4.18777e-05	5.3351e-05	5.60084e-05	5.16786e-05	4.9285e-05	4.48442e-05	4.93134e-05	5.15768e-05	5.30212e-05	5.35422e-05	4.11584e-05	4.86444e-05	4.40773e-05	4.49675e-05
-3.86092e-06	3.59205e-06	1.91834e-06	9.84059e-08	5.79614e-06	3.03308e-06	-4.42322e-06	2.92507e-06	-5.76256e-06	3.35506e-06	-7.1891e-06	2.34941e-06	-2.67057e-06	4.29064e-06	-8.10769e-06	-1.95499e-06	3.23344e-06	2.69471e-06	9.22941e-06	1.39681e-05	2.26027e-05	2.66751e-05	3.37243e-05	3.90596e-05	3.44059e-05	4.34181e-05	5.20384e-05	5.14542e-05	4.02021e-05	4.51407e-05	5.07753e-05	5.34632e-05	5.39548e-05	4.7014e-05	5.23147e-05	4.84506e-05	4.4806e-05	5.53639e-05	5.78746e-05	4.96545e-05	4.85058e-05	4.56928e-05	4.97401e-05	5.20353e-05	5.0012e-05	5.05603e-05	4.17628e-05	4.28595e-05	4.43337e-05	4.70438e-05
2.99585e-06	2.66973e-06	4.67361e-06	1.06374e-06	4.55569e-06	5.56469e-06	-1.43574e-06	3.38063e-06	-7.73352e-06	3.04834e-06	1.15928e-06	4.33199e-06	-1.32206e-06	4.1954e-06	-4.45005e-06	2.01726e-07	1.9614e-06	7.55049e-06	1.27576e-05	1.45839e-05	2.69247e-05	2.4872e-05	2.98463e-05	3.91733e-05	4.19417e-05	4.42369e-05	5.22796e-05	4.66004e-05	4.67563e-05	4.34127e-05	4.79219e-05	4.9287e-05	4.52337e-05	5.02921e-05	4.9901e-05	5.00377e-05	4.37502e-05	5.43927e-05	5.75844e-05	4.77416e-05	4.78037e-05	4.48883e-05	4.47796e-05	5.40946e-05	4.7668e-05	4.08043e-05	4.51933e-05	4.25279e-05	4.55611e-05	4.39312e-05
2.95013e-06	4.87934e-07	4.93471e-06	2.13619e-06	1.71813e-07	7.90439e-06	-8.6289e-07	6.96271e-06	-2.34555e-06	3.92441e-06	-1.27837e-06	8.46937e-06	1.22716e-06	5.235e-06	-5.3492e-06	2.76158e-07	1.22967e-05	1.26923e-05	1.68426e-05	2.22756e-05	2.80507e-05	3.26685e-05	3.84161e-05	4.04793e-05	5.005e-05	4.51863e-05	5.24901e-05	5.02999e-05	5.41318e-05	4.78294e-05	5.34828e-05	5.64318e-05	5.7947e-05	5.31524e-05	5.61482e-05	5.88059e-05	5.44712e-05	5.89926e-05	6.12754e-05	5.23806e-05	5.23431e-05	5.04665e-05	4.63873e-05	5.23235e-05	5.35768e-05	4.69867e-05	4.80692e-05	4.91184e-05	5.25459e-05	5.80464e-05
-3.03846e-06	-4.46264e-08	8.37449e-07	2.32236e-06	2.6466e-06	1.31662e-06	-2.20699e-08	7.10282e-06	2.84974e-06	-2.9457e-07	4.55581e-07	5.55673e-06	7.62109e-06	3.31675e-06	5.48281e-07	2.77502e-06	1.98824e-05	1.27262e-05	2.10258e-05	2.68689e-05	3.6318e-05	3.76439e-05	4.61617e-05	4.91886e-05	5.36077e-05	4.70283e-05	5.55485e-05	5.63555e-05	5.84272e-05	5.67711e-05	5.81246e-05	5.88233e-05	6.2444e-05	5.79501e-05	6.35745e-05	6.57977e-05	6.19098e-05	6.42062e-05	6.89492e-05	6.63543e-05	5.90615e-05	5.91358e-05	5.35283e-05	6.285e-05	6.22366e-05	5.4592e-05	5.57902e-05	5.26702e-05	5.94185e-05	6.01186e-05
-9.03035e-06	8.53547e-07	-1.7941e-06	5.24746e-07	2.32463e-06	2.11057e-06	2.24676e-06	5.00046e-06	1.77471e-06	-1.17635e-06	4.57279e-06	2.59172e-07	1.62977e-06	3.53804e-06	-1.52642e-06	4.08349e-06	1.4895e-05	1.20108e-05	2.09067e-05	2.54308e-05	3.76291e-05	3.58826e-05	4.1614e-05	4.5058e-05	5.01704e-05	4.66863e-05	5.57645e-05	5.53445e-05	5.36392e-05	4.83467e-05	5.69247e-05	5.28612e-05	5.42348e-05	5.52555e-05	5.85216e-05	6.02406e-05	4.75554e-05	5.78044e-05	6.42842e-05	6.40037e-05	5.93619e-05	5.32769e-05	5.36377e-05	5.7753e-05	5.92352e-05	5.36442e-05	4.88323e-05	5.14444e-05	4.96052e-05	5.47724e-05
-8.14228e-06	4.41941e-06	-1.97028e-06	-6.90744e-07	-3.38263e-06	2.89563e-07	2.82683e-06	2.83875e-06	-9.01685e-08	1.89209e-06	5.49769e-06	1.37016e-06	-1.52939e-06	5.5424e-06	-3.40608e-06	6.95404e-06	1.18938e-05	1.70088e-05	1.83066e-05	2.73257e-05	3.77966e-05	3.69966e-05	3.82836e-05	5.05439e-05	5.21524e-05	4.48676e-05	5.56713e-05	5.17324e-05	4.4762e-05	4.59437e-05	5.51189e-05	5.55506e-05	5.13454e-05	4.82876e-05	5.85071e-05	5.46567e-05	4.31543e-05	5.43176e-05	5.6171e-05	5.53687e-05	5.48969e-05	4.60382e-05	4.79314e-05	5.6281e-05	5.2505e-05	5.53622e-05	5.0739e-05	4.9115e-05	4.77748e-05	5.45199e-05
-3.65356e-06	2.31637e-06	-3.69399e-06	3.19604e-06	2.88601e-06	8.44197e-06	9.24225e-07	5.19958e-06	9.89194e-07	6.15195e-07	-4.07037e-07	-4.10265e-06	4.46431e-06	8.95931e-06	3.06007e-08	8.69819e-06	1.10111e-05	2.66342e-05	2.52253e-05	3.17422e-05	4.15475e-05	4.72297e-05	4.5886e-05	5.21963e-05	5.36992e-05	5.47418e-05	5.80069e-05	5.61716e-05	5.26232e-05	5.42852e-05	5.79694e-05	5.99684e-05	5.83687e-05	5.41211e-05	6.36293e-05	6.09323e-05	5.47341e-05	6.40984e-05	6.10837e-05	5.79446e-05	5.60769e-05	5.06942e-05	5.30768e-05	6.07764e-05	5.99089e-05	6.12655e-05	5.45089e-05	5.26854e-05	5.77594e-05	5.80913e-05
-1.43098e-06	3.16049e-06	-1.86577e-07	-3.4953e-06	-2.31623e-06	8.32456e-06	-1.07387e-06	3.99137e-06	1.36088e-06	-1.07088e-06	-5.85953e-08	-3.38192e-06	4.73556e-06	1.13245e-05	2.50177e-06	9.78553e-06	1.62299e-05	2.83178e-05	2.86904e-05	3.43183e-05	3.98957e-05	4.28425e-05	4.95296e-05	5.24556e-05	5.15884e-05	4.97667e-05	5.48659e-05	4.91156e-05	4.94416e-05	5.17167e-05	5.53004e-05	5.40846e-05	5.83385e-05	5.24607e-05	6.01515e-05	5.58262e-05	5.11927e-05	5.92647e-05	6.14292e-05	5.83014e-05	5.70367e-05	5.38843e-05	5.38433e-05	5.4992e-05	6.0054e-05	5.39725e-05	5.16556e-05	5.0637e-05	5.76995e-05	5.68264e-05
9.12094e-07	-1.21479e-06	3.21343e-06	-1.60229e-06	-2.14909e-06	6.04372e-06	3.50838e-06	2.49729e-06	2.44106e-06	4.39811e-06	2.17019e-06	9.45645e-07	4.09137e-06	4.25693e-06	9.28551e-06	7.49389e-06	1.93222e-05	2.69003e-05	2.95274e-05	3.15466e-05	3.84937e-05	4.25764e-05	4.87948e-05	5.34775e-05	4.98641e-05	5.11162e-05	5.48673e-05	4.63762e-05	4.69168e-05	4.77625e-05	5.43299e-05	5.21139e-05	5.7387e-05	4.99161e-05	6.38535e-05	5.04884e-05	5.271e-05	5.36485e-05	5.76468e-05	5.66955e-05	5.74711e-05	5.93611e-05	5.73859e-05	5.52751e-05	5.5975e-05	5.62997e-05	5.07817e-05	4.69823e-05	5.36443e-05	5.56105e-05
-1.3559e-06	-1.08132e-06	5.05795e-07	-1.26565e-06	4.37636e-06	4.4915e-06	-4.48095e-06	3.35043e-06	-1.55235e-07	-9.74106e-07	-3.21541e-07	-3.22785e-07	1.07025e-06	6.77182e-06	7.49841e-06	6.58852e-06	1.77633e-05	1.88409e-05	2.00262e-05	2.75704e-05	3.32653e-05	3.40516e-05	3.85917e-05	4.11009e-05	4.22105e-05	4.12345e-05	4.16592e-05	3.314e-05	3.92495e-05	3.6013e-05	4.84438e-05	3.90501e-05	4.64526e-05	4.17337e-05	5.28186e-05	4.3072e-05	4.20114e-05	3.85638e-05	4.9934e-05	4.47157e-05	4.64652e-05	4.43226e-05	4.89624e-05	4.6417e-05	4.35347e-05	5.18199e-05	4.0381e-05	3.93854e-05	4.44112e-05	4.47338e-05
-2.92247e-06	4.04084e-06	6.59431e-07	2.52898e-06	4.80459e-07	4.94851e-06	-4.54267e-06	1.44397e-06	2.86266e-06	-2.83848e-06	9.56833e-07	-1.25925e-06	2.02028e-06	9.03369e-06	3.72455e-06	1.18701e-05	2.55272e-05	1.82015e-05	2.28974e-05	3.69579e-05	3.48234e-05	3.8159e-05	3.69615e-05	4.23672e-05	4.41459e-05	4.38998e-05	4.77764e-05	3.99184e-05	4.38104e-05	4.31884e-05	5.03127e-05	4.85256e-05	5.00929e-05	4.51472e-05	4.93949e-05	4.50323e-05	4.81622e-05	4.67036e-05	4.81726e-05	4.56919e-05	4.69143e-05	4.32306e-05	5.02975e-05	4.82106e-05	4.43195e-05	4.73042e-05	4.4411e-05	4.16733e-05	4.91381e-05	4.54769e-05
2.81271e-07	5.85827e-06	-1.83055e-06	3.54317e-07	1.802e-06	2.80947e-06	-9.65e-07	-2.31339e-07	8.04224e-07	-1.63097e-06	-1.06441e-06	9.91456e-07	8.42825e-06	9.41774e-06	4.5278e-06	1.17777e-05	1.76325e-05	2.23838e-05	2.70636e-05	3.28665e-05	3.3862e-05	3.44117e-05	3.89616e-05	4.1017e-05	3.97492e-05	3.7423e-05	4.31668e-05	4.0873e-05	3.93795e-05	3.99379e-05	3.98226e-05	4.48626e-05	4.45666e-05	4.53889e-05	4.21602e-05	3.99742e-05	4.26269e-05	4.37225e-05	4.94393e-05	4.0639e-05	4.25289e-05	3.85216e-05	4.08285e-05	4.38254e-05	4.64455e-05	4.35298e-05	3.41869e-05	3.32009e-05	4.35038e-05	4.02798e-05
-4.82333e-07	5.58225e-06	1.2181e-06	1.5042e-06	6.11324e-06	2.45549e-06	-1.15065e-06	-2.25117e-06	-3.19333e-07	-2.7916e-06	-3.8186e-06	4.65198e-06	3.98714e-06	6.16094e-06	7.52884e-06	1.08188e-05	1.77075e-05	2.45123e-05	2.95694e-05	2.73254e-05	3.53103e-05	3.06603e-05	3.97812e-05	3.93197e-05	3.81928e-05	3.71606e-05	3.89066e-05	3.51314e-05	3.22748e-05	3.98181e-05	3.60813e-05	3.31228e-05	3.76772e-05	4.30782e-05	3.41595e-05	3.3256e-05	3.63354e-05	3.59502e-05	4.17528e-05	3.75733e-05	3.94814e-05	3.13611e-05	3.70047e-05	3.69287e-05	3.68641e-05	3.81052e-05	2.96059e-05	3.05675e-05	3.52638e-05	3.75794e-05
2.75833e-06	1.58565e-06	2.33206e-06	1.23192e-06	4.66983e-06	-1.71318e-06	-1.7145e-06	3.34009e-06	-3.60515e-06	-8.91006e-07	-1.85559e-06	-1.86957e-06	6.6244e-07	5.50063e-06	9.05678e-06	1.43718e-05	1.72412e-05	2.79858e-05	2.64052e-05	2.34005e-05	3.13e-05	3.33345e-05	3.41997e-05	3.62014e-05	3.61177e-05	3.66337e-05	3.42495e-05	3.13979e-05	3.07079e-05	3.56278e-05	3.12175e-05	3.32205e-05	3.46133e-05	3.76138e-05	3.53934e-05	3.68283e-05	3.98321e-05	3.58756e-05	4.11875e-05	3.94609e-05	3.51901e-05	3.60858e-05	3.59435e-05	3.42657e-05	3.62186e-05	4.37986e-05	2.85071e-05	2.80157e-05	3.76702e-05	3.40147e-05
-1.18593e-06	4.96626e-06	3.80438e-06	-6.50041e-07	4.17318e-06	1.4285e-06	2.79142e-06	8.6228e-07	-4.17083e-06	5.0764e-06	-1.72015e-06	-2.39271e-06	3.9883e-06	6.13301e-06	1.02184e-05	1.50151e-05	2.0771e-05	3.17899e-05	2.51487e-05	2.35803e-05	2.94063e-05	3.50343e-05	3.32966e-05	3.47484e-05	3.55236e-05	3.4574e-05	3.90631e-05	3.34686e-05	3.08445e-05	3.63322e-05	3.43456e-05	3.80928e-05	3.83417e-05	3.81281e-05	3.9754e-05	3.74282e-05	4.57827e-05	3.34461e-05	4.2462e-05	4.33701e-05	3.15038e-05	4.0236e-05	3.76709e-05	3.47439e-05	4.07237e-05	4.27989e-05	3.70515e-05	3.65069e-05	3.67023e-05	3.61059e-05
-2.97862e-06	8.74177e-07	2.6166e-06	-2.24393e-06	-2.01673e-06	8.6963e-07	4.785e-06	1.13618e-06	-3.06284e-07	5.60317e-06	7.00334e-07	9.97481e-07	9.28916e-07	3.34064e-06	1.40351e-05	1.66852e-05	1.98323e-05	2.37447e-05	2.12846e-05	3.11412e-05	2.53216e-05	3.31549e-05	3.40476e-05	3.51912e-05	3.3481e-05	3.39926e-05	3.13633e-05	2.92859e-05	3.16664e-05	2.78042e-05	3.29922e-05	3.53036e-05	3.6385e-05	2.98939e-05	3.59603e-05	3.23779e-05	4.06836e-05	3.53465e-05	3.64186e-05	3.4222e-05	3.37049e-05	3.36708e-05	3.63666e-05	3.68499e-05	3.86305e-05	3.65028e-05	3.02568e-05	3.06686e-05	3.33207e-05	3.42894e-05
-2.19043e-07	1.02304e-06	-1.1786e-06	-7.79969e-07	1.69825e-06	3.99384e-07	2.58249e-06	-1.20092e-06	-6.52038e-07	2.14835e-06	3.94214e-06	9.87157e-07	-1.80127e-08	4.9166e-06	8.99047e-06	7.76808e-06	1.95632e-05	2.19502e-05	1.91534e-05	2.84932e-05	2.15105e-05	2.34443e-05	2.49662e-05	2.6902e-05	2.86552e-05	2.00068e-05	2.44895e-05	2.29133e-05	1.84244e-05	2.12182e-05	2.52422e-05	1.80839e-05	2.26965e-05	2.14367e-05	2.79663e-05	2.11087e-05	2.8835e-05	2.72545e-05	2.33089e-05	1.89246e-05	2.2813e-05	2.34975e-05	2.29225e-05	2.41549e-05	2.49437e-05	2.51674e-05	2.04658e-05	1.74585e-05	2.18946e-05	2.89727e-05
4.17262e-06	7.44451e-06	-8.32313e-07	-2.16177e-06	5.48124e-06	1.19187e-06	6.05135e-07	3.65278e-06	-5.79691e-06	2.38807e-06	5.74112e-06	-3.85682e-06	1.21808e-06	3.4878e-06	5.39137e-06	8.16546e-06	2.3373e-05	1.56355e-05	1.69868e-05	2.11729e-05	2.13331e-05	2.27496e-05	2.66035e-05	2.42252e-05	2.27135e-05	1.14613e-05	2.3778e-05	2.0349e-05	1.34158e-05	1.88075e-05	1.81015e-05	1.63433e-05	1.60905e-05	1.77991e-05	2.38824e-05	1.49186e-05	2.087e-05	2.03612e-05	1.73479e-05	1.34949e-05	1.38798e-05	2.19268e-05	1.58454e-05	1.96672e-05	2.21913e-05	2.40048e-05	1.90177e-05	1.58501e-05	1.87513e-05	2.50554e-05
4.40769e-06	5.77364e-07	-1.06763e-06	-2.13702e-06	3.40812e-06	1.51798e-06	4.77623e-06	-6.43917e-07	4.0859e-07	3.08768e-06	-1.07463e-07	-1.62786e-06	1.86422e-06	1.86149e-06	8.92071e-06	8.56388e-06	1.78032e-05	1.59273e-05	1.57414e-05	1.63786e-05	2.07323e-05	2.30757e-05	2.12634e-05	2.03214e-05	2.02342e-05	1.5357e-05	2.06082e-05	1.77182e-05	1.6479e-05	1.38964e-05	2.16545e-05	1.51101e-05	1.1789e-05	1.70047e-05	2.18204e-05	1.65816e-05	1.90698e-05	1.96031e-05	2.09333e-05	1.64278e-05	1.94839e-05	1.61565e-05	1.76103e-05	1.56927e-05	1.83751e-05	2.06618e-05	1.97933e-05	1.91439e-05	1.9963e-05	1.79025e-05
1.92555e-06	-3.00316e-06	-5.35865e-07	1.52234e-06	2.02634e-06	1.15683e-06	-1.82469e-06	-3.10947e-06	1.95353e-06	-8.01158e-08	1.78384e-06	-1.55128e-06	1.53874e-07	6.90199e-06	7.4208e-06	8.25393e-06	1.70006e-05	1.27048e-05	1.40145e-05	2.17399e-05	1.60821e-05	1.88299e-05	1.26196e-05	1.66223e-05	1.88832e-05	1.47723e-05	1.51821e-05	1.46299e-05	1.41497e-05	1.06837e-05	9.46048e-06	1.21558e-05	9.27079e-06	1.43919e-05	1.39212e-05	1.14345e-05	1.45419e-05	6.74107e-06	1.30623e-05	1.01537e-05	1.39996e-05	5.82873e-06	1.58823e-05	1.2645e-05	1.49589e-05	1.36263e-05	1.69192e-05	1.33681e-05	1.65866e-05	8.21737e-06
1.21382e-06	3.97888e-06	2.74136e-07	2.14442e-06	2.11288e-07	1.08355e-06	-1.8644e-06	5.84898e-07	-5.60682e-07	4.39621e-06	1.50155e-06	-2.77688e-06	-4.43323e-07	7.02732e-06	2.41552e-07	5.75439e-06	1.91197e-05	1.31877e-05	1.13479e-05	1.08064e-05	1.48952e-05	1.32983e-05	7.12107e-06	1.47085e-05	1.56323e-05	5.47192e-06	1.29511e-05	9.17309e-06	7.63753e-06	9.06945e-06	4.91969e-06	7.71987e-06	5.2808e-06	6.05684e-06	8.30207e-06	6.71357e-06	7.38403e-06	4.29247e-06	4.3046e-06	1.32116e-05	5.49476e-06	3.36577e-06	1.14058e-05	1.01521e-05	1.34736e-05	8.58187e-06	1.12827e-05	4.47776e-06	1.58072e-05	6.56307e-06
-6.39675e-06	8.25194e-07	3.18861e-06	3.15444e-06	4.25962e-06	2.01244e-06	-2.10576e-06	3.70816e-06	-4.17417e-06	4.32369e-06	4.59508e-06	1.97364e-06	2.58922e-06	-2.77677e-07	3.4184e-06	4.58308e-06	1.19329e-05	6.05327e-06	1.15709e-05	6.59763e-06	1.20938e-05	9.49019e-06	3.77788e-06	7.69494e-06	3.22919e-06	-1.27631e-06	1.08077e-05	3.68514e-06	-3.95011e-06	3.59884e-06	4.65016e-06	6.52494e-07	6.64904e-07	-1.35844e-06	2.21082e-07	5.03458e-06	-5.56872e-06	5.93332e-07	5.89369e-06	7.98759e-06	2.48238e-06	4.58032e-06	2.3872e-06	3.87652e-07	6.30112e-06	2.45737e-06	3.12877e-06	6.06069e-06	3.03538e-06	5.2373e-06
6.49659e-07	7.08726e-06	-3.57758e-06	-2.34708e-06	5.31798e-07	1.24865e-06	-7.8486e-06	3.75456e-06	3.6423e-07	-5.69157e-07	1.84458e-06	7.34297e-06	2.80686e-06	-4.93633e-06	3.07338e-06	-1.77218e-07	3.11457e-06	2.44577e-06	1.41412e-06	7.63367e-06	6.79888e-07	-1.77352e-06	-1.81492e-06	-7.67211e-06	-2.40512e-06	-3.71181e-06	-8.07343e-08	-5.59545e-06	-1.0546e-05	-2.06215e-06	7.35467e-07	-4.79953e-06	-9.13354e-07	8.8223e-07	-8.45943e-06	3.87479e-06	-8.68016e-06	-2.47145e-06	-2.25109e-06	-9.0656e-06	-3.62032e-06	2.38711e-06	-6.81178e-07	-4.15916e-06	-2.57034e-07	-9.04383e-06	-5.3919e-06	7.635e-06	-4.34742e-06	-1.78285e-06
6.30613e-08	4.06628e-06	6.94829e-07	5.0306e-06	1.8275e-06	1.90406e-06	1.17464e-06	1.59749e-06	-4.31478e-06	-1.11124e-06	6.95865e-07	6.90501e-06	4.46348e-07	2.80647e-07	-1.99653e-06	4.35962e-06	9.66552e-06	4.62113e-06	-1.1042e-06	-1.5178e-06	-4.45246e-08	-1.04026e-06	-3.63611e-06	-8.27461e-06	-7.96458e-06	-9.01577e-06	-5.83149e-06	-1.46002e-05	-1.01959e-05	-7.12369e-06	-8.41115e-06	-1.03232e-05	-8.45595e-06	-6.67212e-06	-1.01608e-05	-9.52878e-06	-7.03585e-06	-7.95613e-06	-7.26972e-06	-9.40404e-06	-6.38454e-06	-6.40537e-06	-6.6943e-06	-8.71608e-06	-9.42454e-06	-5.36618e-06	-1.09302e-05	-8.97589e-06	-1.29549e-05	-8.79705e-06
3.3925e-06	2.36357e-06	2.55059e-06	-6.21427e-07	-6.30684e-07	-1.69617e-06	-3.85593e-06	-3.57771e-06	3.35983e-07	-1.20432e-06	-2.49883e-07	6.09237e-06	-4.25584e-06	7.45431e-06	-2.71679e-06	-1.43518e-06	3.90959e-06	3.01489e-06	-1.81847e-06	-3.11716e-06	-8.22507e-07	-2.5502e-06	-7.09785e-06	-6.87916e-06	-8.72916e-06	-1.7762e-05	-1.1147e-05	-1.19553e-05	-6.93867e-06	-1.12342e-05	-8.33517e-06	-1.4309e-05	-1.26649e-05	-4.2351e-06	-1.0634e-05	-5.88975e-06	-9.07108e-06	-5.88465e-06	-5.39993e-06	-1.14563e-05	-8.97252e-06	-1.30162e-05	-9.3693e-06	-6.20628e-06	-3.14328e-06	-4.79165e-06	-5.47916e-06	-1.15145e-05	-8.50923e-06	-6.72817e-06
-5.06442e-06	1.56016e-07	-5.63223e-07	6.43446e-07	-4.64392e-06	-7.75309e-06	-8.60656e-06	-7.6107e-07	5.70033e-06	-4.5114e-06	-2.0015e-07	3.41904e-06	-2.82211e-06	2.43954e-06	4.25115e-06	-1.7596e-06	-2.84806e-06	1.24539e-06	2.81958e-07	-3.85951e-06	-4.4948e-06	-7.88249e-06	-8.31285e-06	-6.43901e-06	-1.05063e-05	-1.37924e-05	-1.3156e-05	-9.98155e-06	-4.78357e-06	-1.82774e-05	-1.46979e-05	-1.98146e-05	-1.59105e-05	-2.91035e-06	-1.40512e-05	-1.13773e-05	-8.89258e-06	-1.40998e-05	-1.35899e-05	-1.90264e-05	-7.96103e-06	-1.60869e-05	-1.46329e-05	-8.94483e-06	-6.27918e-06	-1.08463e-05	-1.40708e-05	-1.16055e-05	-6.72877e-06	-1.29411e-05
-6.40464e-06	1.40163e-06	4.25731e-06	2.31163e-06	-6.90368e-07	-4.51883e-06	-4.68642e-06	1.30757e-06	5.13389e-06	-2.27515e-06	-1.81956e-06	-3.9172e-06	4.4982e-06	-1.91112e-06	-9.3982e-07	9.36943e-07	-1.57369e-06	-7.08012e-06	-2.88758e-07	-6.71411e-06	-8.86484e-06	-1.20582e-05	-1.59179e-05	-1.6063e-05	-1.86835e-05	-2.43991e-05	-2.30535e-05	-1.71388e-05	-1.76455e-05	-2.70492e-05	-1.84549e-05	-2.49373e-05	-1.85714e-05	-1.7882e-05	-2.26824e-05	-1.87008e-05	-2.00135e-05	-2.09862e-05	-2.06626e-05	-2.14285e-05	-2.01797e-05	-2.25184e-05	-1.85896e-05	-1.81707e-05	-1.90675e-05	-1.73246e-05	-2.3078e-05	-1.76991e-05	-1.38419e-05	-9.54996e-06
2.31781e-06	4.86601e-06	5.38395e-06	-1.12133e-06	1.01909e-06	-3.32027e-06	1.91803e-06	1.46388e-06	-1.86792e-07	-2.45138e-06	-1.13268e-06	-4.57615e-06	3.579e-06	2.17256e-06	-4.87114e-06	-1.05021e-05	-2.96808e-07	-3.42841e-06	-7.57305e-06	-9.11592e-06	-7.83085e-06	-1.42089e-05	-1.9275e-05	-1.48504e-05	-1.91606e-05	-2.91036e-05	-2.20551e-05	-1.87563e-05	-2.45884e-05	-2.57732e-05	-1.67944e-05	-2.43377e-05	-1.96105e-05	-1.94756e-05	-1.79737e-05	-2.5167e-05	-2.08612e-05	-1.91463e-05	-1.87354e-05	-1.62462e-05	-1.59258e-05	-2.35639e-05	-1.24204e-05	-1.87377e-05	-1.39425e-05	-1.66803e-05	-2.12988e-05	-2.31712e-05	-1.57982e-05	-1.26948e-05
-3.22106e-06	3.63891e-06	-6.67473e-07	6.93235e-06	5.56644e-06	-2.74552e-06	-3.51783e-06	2.11932e-06	-7.57157e-07	-3.76854e-06	1.69844e-06	-2.58792e-06	-3.82839e-07	2.66226e-06	-1.04198e-05	-9.81807e-06	-2.89791e-06	-1.06456e-06	-1.22969e-05	-4.30006e-06	-1.48833e-05	-2.14418e-05	-2.13651e-05	-1.75836e-05	-1.56182e-05	-2.18661e-05	-1.25747e-05	-2.09408e-05	-1.82876e-05	-1.24782e-05	-1.51195e-05	-2.17361e-05	-2.42943e-05	-1.72257e-05	-1.45375e-05	-1.29418e-05	-1.35568e-05	-1.35536e-05	-1.0672e-05	-1.40522e-05	-1.19989e-05	-2.7398e-05	-1.48789e-05	-1.60352e-05	-1.11737e-05	-1.65636e-05	-2.04579e-05	-1.58863e-05	-1.34373e-05	-4.87075e-06
4.26745e-07	-1.02349e-05	-4.29536e-06	7.32582e-06	9.43168e-06	-1.05364e-06	-9.09098e-07	-2.89746e-06	3.11536e-06	-2.47318e-06	2.84549e-06	-7.30381e-06	-2.94469e-06	9.20452e-07	-1.11402e-05	-8.74838e-06	-7.22697e-06	-1.03289e-05	-8.17176e-06	-1.01715e-05	-1.26042e-05	-2.00975e-05	-2.18689e-05	-1.6316e-05	-1.60113e-05	-2.72447e-05	-1.72459e-05	-2.47199e-05	-2.60284e-05	-1.92397e-05	-1.522e-05	-1.96108e-05	-1.94052e-05	-1.76618e-05	-1.8614e-05	-2.45936e-05	-1.62186e-05	-1.69178e-05	-9.54993e-06	-1.58028e-05	-1.20674e-05	-2.33566e-05	-2.96507e-05	-2.96773e-05	-1.52613e-05	-2.62807e-05	-1.74809e-05	-1.70437e-05	-1.67735e-05	-9.20657e-06
5.19794e-06	-2.76577e-06	-4.7852e-06	-7.33833e-06	6.59417e-06	5.67903e-06	-1.8243e-06	-7.96795e-06	7.08125e-06	2.70146e-07	3.03431e-06	-3.29325e-06	4.9471e-06	4.52281e-06	-6.48585e-06	-3.87203e-06	-2.02925e-06	-1.19368e-05	-8.0161e-06	-1.61337e-05	-1.54714e-05	-1.5884e-05	-1.70282e-05	-2.60949e-05	-2.36488e-05	-2.40465e-05	-2.39111e-05	-2.61792e-05	-1.86882e-05	-2.3822e-05	-1.06012e-05	-2.27641e-05	-1.64087e-05	-1.86427e-05	-1.39765e-05	-1.21832e-05	-1.45365e-05	-1.38776e-05	-8.54318e-06	-2.10427e-05	-1.4379e-05	-1.78077e-05	-2.19746e-05	-1.41463e-05	-1.63693e-05	-2.00783e-05	-1.7668e-05	-1.54478e-05	-1.16361e-05	-1.50708e-05
7.12532e-06	2.84766e-06	4.58147e-06	4.15904e-06	3.1263e-06	4.67909e-06	2.49761e-06	2.251e-07	-3.60847e-06	-2.69188e-06	-6.73033e-06	-7.30978e-07	1.2932e-05	-2.69275e-06	-3.2655e-06	9.22975e-07	-1.0481e-05	-1.12867e-05	-8.95975e-06	-2.41944e-05	-1.48281e-05	-1.46452e-05	-9.64818e-06	-1.70874e-05	-3.02185e-05	-2.63338e-05	-2.21266e-05	-2.90995e-05	-1.61165e-05	-2.49034e-05	-2.42513e-05	-2.50819e-05	-2.96234e-05	-1.69764e-05	-2.06481e-05	-2.30593e-05	-2.39671e-05	-2.12725e-05	-2.64901e-05	-2.5989e-05	-1.29824e-05	-2.89152e-05	-2.25783e-05	-1.89557e-05	-2.7141e-05	-2.59298e-05	-1.62245e-05	-1.59023e-05	-1.31369e-05	-2.5347e-05
3.6605e-06	2.19226e-07	-1.53378e-06	-1.30396e-06	1.11281e-06	-2.13641e-06	1.33504e-06	3.53844e-06	4.52601e-06	6.3014e-06	4.84249e-06	-1.48371e-06	-1.29584e-06	-3.5434e-06	-5.42108e-06	-1.56673e-06	-7.50846e-06	-6.02879e-06	-1.27624e-05	-1.7717e-05	-1.04006e-05	-1.66054e-05	-2.48092e-05	-1.96788e-05	-2.14486e-05	-1.73155e-05	-1.97502e-05	-2.42572e-05	-1.84345e-05	-1.90016e-05	-3.16946e-05	-2.97265e-05	-2.95607e-05	-1.84718e-05	-2.41838e-05	-2.86532e-05	-2.9684e-05	-2.3385e-05	-2.86208e-05	-2.0009e-05	-2.19675e-05	-3.20056e-05	-2.53344e-05	-2.40709e-05	-2.52265e-05	-2.84773e-05	-1.88691e-05	-2.10363e-05	-2.29896e-05	-2.84986e-05
5.26403e-07	1.29647e-06	5.58468e-06	1.65607e-06	-1.17307e-07	1.58604e-06	-5.40486e-06	-5.20456e-06	1.14164e-05	6.3428e-06	7.64766e-06	-2.61931e-06	-6.0943e-06	-9.66817e-07	-9.617e-06	-1.00471e-05	-1.3484e-05	-2.96266e-07	-1.76042e-05	-1.44734e-05	-1.60028e-05	-1.39216e-05	-3.38802e-05	-1.75642e-05	-1.27815e-05	-1.10727e-05	-1.84327e-05	-1.7944e-05	-1.17734e-05	-2.03549e-05	-3.31801e-05	-2.12502e-05	-2.50957e-05	-1.38405e-05	-2.26672e-05	-2.53009e-05	-2.5613e-05	-1.89718e-05	-2.2648e-05	-1.2943e-05	-2.95636e-05	-3.18135e-05	-2.89871e-05	-2.64573e-05	-1.49741e-05	-2.83766e-05	-1.66315e-05	-2.19418e-05	-2.82129e-05	-2.8793e-05
1.20385e-06	-1.23067e-06	3.98152e-06	-7.19862e-06	3.15666e-06	1.98386e-06	-5.95426e-06	2.50159e-06	7.20199e-06	8.54606e-06	-5.53001e-07	-4.7345e-06	4.27638e-06	-2.17486e-06	-6.63095e-06	-1.81397e-05	-1.02392e-05	-9.3626e-06	-1.84482e-05	-2.4684e-05	-2.9234e-05	-2.58863e-05	-2.66411e-05	-2.28794e-05	-2.60281e-05	-3.19727e-05	-2.42865e-05	-2.18191e-05	-2.35189e-05	-1.92032e-05	-2.01856e-05	-1.83776e-05	-1.98379e-05	-2.96757e-05	-2.57425e-05	-2.28168e-05	-2.64761e-05	-2.548e-05	-1.96556e-05	-3.1788e-05	-2.00165e-05	-2.25556e-05	-3.38466e-05	-2.71568e-05	-3.19511e-05	-2.47495e-05	-2.57569e-05	-2.04543e-05	-3.28817e-05	-2.9678e-05
3.50011e-06	1.9693e-06	3.24568e-06	-2.98988e-06	-4.27021e-06	1.87802e-06	3.30201e-06	-4.41723e-06	-9.88999e-06	1.94641e-06	-6.61446e-07	-3.37663e-07	-2.01938e-06	2.75059e-06	-9.34216e-06	-1.78037e-05	-1.57264e-05	-1.88943e-05	-1.96148e-05	-3.04725e-05	-3.23948e-05	-3.38966e-05	-3.17658e-05	-1.81863e-05	-2.48001e-05	-4.19326e-05	-2.53213e-05	-3.1621e-05	-2.69559e-05	-2.72072e-05	-2.04274e-05	-2.60835e-05	-3.42633e-05	-2.66739e-05	-3.62661e-05	-2.60823e-05	-3.14611e-05	-2.80662e-05	-2.37914e-05	-3.79575e-05	-1.86393e-05	-3.55885e-05	-2.81584e-05	-3.04354e-05	-2.56723e-05	-3.16032e-05	-3.3116e-05	-2.51121e-05	-2.96931e-05	-2.75617e-05
-7.26239e-07	-1.9657e-06	-2.75292e-06	8.30473e-08	1.75099e-07	3.04775e-06	-3.79637e-06	-5.61397e-06	-3.65528e-06	-4.94372e-06	-9.53005e-06	-3.59875e-06	3.35658e-07	-6.19521e-06	-1.70206e-05	-2.25003e-05	-1.26919e-05	-1.91536e-05	-1.87703e-05	-2.56506e-05	-2.4446e-05	-2.98257e-05	-3.20565e-05	-2.8395e-05	-3.30617e-05	-3.37118e-05	-2.30704e-05	-2.58432e-05	-2.82468e-05	-2.50105e-05	-2.16999e-05	-2.80051e-05	-2.59903e-05	-2.64716e-05	-1.70074e-05	-2.3268e-05	-2.44008e-05	-2.10702e-05	-2.72497e-05	-3.11707e-05	-2.96296e-05	-2.31867e-05	-2.48321e-05	-2.27775e-05	-1.7399e-05	-2.59137e-05	-2.56426e-05	-1.83515e-05	-2.99666e-05	-2.58033e-05
6.9846e-06	1.34222e-06	3.34278e-06	4.48032e-07	1.89253e-06	-4.75714e-08	-2.85981e-06	-7.23374e-06	3.23881e-06	-3.46835e-07	-7.28185e-06	-4.11446e-06	-3.92713e-06	-3.19647e-06	-1.36058e-05	-1.95355e-05	-1.72922e-05	-1.8237e-05	-1.74431e-05	-2.86987e-05	-2.40847e-05	-3.04315e-05	-2.89106e-05	-2.90389e-05	-2.91259e-05	-3.26479e-05	-2.3936e-05	-2.31389e-05	-2.57427e-05	-2.56217e-05	-2.61604e-05	-2.97736e-05	-2.78454e-05	-2.75353e-05	-1.95692e-05	-2.35827e-05	-2.88129e-05	-3.0373e-05	-2.8706e-05	-3.13056e-05	-3.2915e-05	-3.20987e-05	-2.71659e-05	-2.7164e-05	-2.44611e-05	-2.73655e-05	-2.51816e-05	-2.40144e-05	-3.65676e-05	-2.08066e-05
-7.4992e-07	6.18199e-06	8.36053e-08	3.34277e-06	5.11013e-06	4.18945e-06	-1.57171e-06	5.49945e-06	4.99394e-07	2.78171e-06	-2.73796e-06	-5.87144e-06	-9.13979e-06	-1.78554e-06	-9.49585e-06	-1.71865e-05	-2.0593e-05	-2.0889e-05	-1.65342e-05	-2.45702e-05	-2.39679e-05	-3.03599e-05	-2.58184e-05	-2.64829e-05	-3.18098e-05	-3.04549e-05	-2.61891e-05	-2.5391e-05	-2.49895e-05	-2.10127e-05	-2.75096e-05	-2.8332e-05	-2.59818e-05	-2.87696e-05	-3.22791e-05	-2.31615e-05	-3.44901e-05	-3.22693e-05	-2.42255e-05	-3.83259e-05	-2.71128e-05	-3.59194e-05	-2.64103e-05	-2.85542e-05	-3.4327e-05	-3.40957e-05	-2.70593e-05	-2.51863e-05	-3.77485e-05	-2.15022e-05
-6.41907e-06	2.33011e-06	4.62735e-06	2.27427e-06	1.17848e-06	5.10855e-06	3.36373e-06	3.05204e-06	4.10449e-06	9.79318e-07	7.5313e-07	1.98028e-06	3.24463e-08	-5.06825e-06	-1.47084e-05	-1.55151e-05	-2.03668e-05	-1.97495e-05	-1.52568e-05	-2.2213e-05	-1.99229e-05	-2.42915e-05	-2.12321e-05	-2.47872e-05	-2.40576e-05	-1.96604e-05	-1.5626e-05	-2.11043e-05	-2.01448e-05	-1.72333e-05	-1.4575e-05	-1.70137e-05	-1.53126e-05	-2.05428e-05	-2.13399e-05	-1.78417e-05	-2.71195e-05	-1.63321e-05	-1.50909e-05	-2.59401e-05	-2.18153e-05	-2.10425e-05	-9.87094e-06	-2.46705e-05	-2.08721e-05	-1.58824e-05	-1.8048e-05	-2.09314e-05	-1.55296e-05	-1.61716e-05
-9.29407e-09	5.00873e-07	1.0512e-07	4.43115e-06	-2.2857e-06	-1.61209e-06	-9.2619e-07	1.79106e-06	1.18206e-06	6.73354e-06	-7.18535e-07	-2.02578e-06	1.17259e-06	-3.31528e-06	-1.48062e-05	-1.44343e-05	-2.4306e-05	-2.59555e-05	-1.20071e-05	-2.57668e-05	-2.54675e-05	-2.5791e-05	-2.17874e-05	-1.9651e-05	-2.2962e-05	-2.03701e-05	-1.58408e-05	-1.79862e-05	-1.28951e-05	-1.47767e-05	-1.62436e-05	-1.37134e-05	-1.14433e-05	-1.68919e-05	-1.94101e-05	-1.54982e-05	-2.43415e-05	-1.68794e-05	-1.29278e-05	-1.60421e-05	-1.22275e-05	-2.57864e-05	-2.25341e-05	-1.90814e-05	-1.58879e-05	-1.75218e-05	-1.82513e-05	-2.22955e-05	-2.28983e-05	-1.90636e-05
2.88703e-06	-4.8702e-07	-4.98421e-06	2.4863e-07	7.84925e-06	4.73516e-06	8.51974e-06	-6.9287e-06	-3.26254e-06	5.62755e-06	1.51338e-06	-2.88318e-06	2.13667e-06	3.49117e-06	-1.19979e-05	-1.08198e-05	-1.70419e-05	-1.11736e-05	-2.37117e-05	-1.90732e-05	-2.6599e-05	-1.84299e-05	-1.82065e-05	-2.29755e-05	-2.50442e-05	-1.79102e-05	-2.20766e-05	-1.33136e-05	-1.06073e-05	-2.21157e-05	-1.51665e-05	-2.19222e-05	-2.19616e-05	-2.24639e-05	-1.55061e-05	-2.33116e-05	-1.55099e-05	-2.60791e-05	-1.57544e-05	-1.35983e-05	-1.62649e-05	-2.38657e-05	-2.19944e-05	-1.75662e-05	-2.98258e-05	-2.23972e-05	-2.31683e-05	-2.01762e-05	-1.67807e-05	-2.09821e-05
-2.49689e-06	-2.46646e-07	-9.46634e-06	-8.2741e-06	1.21148e-05	7.16762e-06	1.02468e-05	-5.62521e-06	-4.95431e-06	-2.29026e-06	-7.0607e-08	-1.21207e-06	-1.96726e-08	-6.18237e-06	-3.89219e-06	-3.17226e-06	-1.01693e-05	-9.07526e-06	-1.794e-05	-9.3068e-06	-8.97672e-06	-8.1555e-06	-1.14502e-05	-1.12242e-05	-1.24612e-05	-1.20537e-05	-6.25765e-06	-2.69033e-06	-5.5508e-06	-6.63924e-06	-7.01871e-06	-1.11147e-06	-9.88126e-06	-1.20786e-05	-4.05333e-06	-9.83292e-06	-2.92942e-06	-8.07627e-06	-6.66372e-06	-6.29413e-06	-6.04699e-06	-7.95226e-06	-1.31207e-05	-1.57978e-05	-2.0156e-05	-6.54389e-06	-1.29011e-05	-8.44957e-07	-9.99591e-06	-7.55801e-06
-3.43536e-07	3.3117e-06	-7.34319e-06	-1.24891e-05	1.47415e-05	5.466e-06	3.07422e-06	-1.75675e-07	-1.00805e-06	-3.08527e-06	-4.40572e-06	-3.51635e-06	-2.65043e-06	-8.38383e-06	-4.9953e-06	-1.14972e-05	-5.62861e-06	-1.28103e-05	-1.87944e-05	-1.51216e-05	-1.45768e-05	-1.74196e-05	-1.46751e-05	-1.30211e-05	-1.46238e-05	-1.27524e-05	-1.2232e-05	-9.09433e-06	-7.85352e-06	-7.18472e-06	-1.21295e-05	-4.41937e-06	-1.07359e-05	-1.49407e-05	-6.08304e-06	-1.25454e-05	-7.82732e-06	-1.08206e-05	-1.01094e-05	-1.3386e-05	-9.69649e-06	-7.12471e-06	-1.36802e-05	-1.75505e-05	-1.64639e-05	-1.29521e-05	-1.36784e-05	-1.66027e-06	-1.28975e-05	-1.42834e-05
-2.76124e-06	-6.31459e-06	-1.714e-06	-1.21321e-05	-1.26257e-06	-2.99883e-06	-4.41389e-06	2.91583e-06	-5.59142e-06	-2.09104e-06	-7.25729e-07	-6.79052e-06	5.09656e-06	-7.75695e-06	-1.44119e-05	-1.42653e-05	-1.29398e-05	-1.56365e-05	-1.05155e-05	-1.61165e-05	-1.94224e-05	-1.90254e-05	-1.62665e-05	-2.04692e-05	-1.42282e-05	-1.98244e-05	-2.11067e-05	-2.18229e-05	-1.54624e-05	-1.79256e-05	-1.55762e-05	-1.97968e-05	-1.65875e-05	-1.82188e-05	-1.34825e-05	-1.28052e-05	-1.33561e-05	-1.8858e-05	-1.89677e-05	-2.33184e-05	-2.26116e-05	-2.09559e-05	-2.77886e-05	-2.60006e-05	-1.80828e-05	-2.71503e-05	-3.36384e-05	-1.55208e-05	-2.31094e-05	-2.43823e-05
2.62531e-06	-2.61911e-06	4.91879e-08	-1.18198e-05	-9.94753e-06	-3.05645e-06	-2.11476e-06	2.38445e-06	-1.1068e-05	-2.52034e-06	1.01881e-06	-6.99612e-07	3.40808e-06	-6.6838e-06	-1.00972e-05	-1.10081e-05	-1.82006e-05	-1.81253e-05	-9.73072e-06	-1.58248e-05	-2.1886e-05	-2.52098e-05	-1.32781e-05	-1.84737e-05	-1.66103e-05	-1.61871e-05	-1.43035e-05	-1.81614e-05	-5.72663e-06	-1.7351e-05	-1.50023e-05	-1.85484e-05	-1.79664e-05	-2.02415e-05	-1.98153e-05	-1.22396e-05	-2.03337e-05	-1.37507e-05	-1.29e-05	-1.74876e-05	-2.51185e-05	-1.68516e-05	-1.77526e-05	-2.1371e-05	-1.14428e-05	-1.5892e-05	-2.32531e-05	-1.20625e-05	-2.43138e-05	-1.24433e-05
-3.48223e-06	-3.37291e-06	9.1761e-06	-6.77491e-06	-1.26262e-06	-5.98238e-06	8.08758e-07	4.65185e-06	-7.47691e-07	-6.05553e-06	-1.96369e-07	-1.1927e-05	-6.36788e-07	-6.27996e-07	3.68387e-07	-8.6604e-06	-1.24116e-05	-1.46725e-05	-1.63817e-05	-1.5213e-05	-1.95247e-05	-2.14997e-05	-1.96231e-05	-1.99667e-05	-1.46682e-05	-1.26875e-05	-1.23544e-05	-8.31513e-06	-1.00462e-05	-1.42485e-05	-1.78574e-05	-1.17121e-05	-8.58034e-06	-1.11598e-05	-1.12151e-05	-1.13881e-05	-1.14677e-05	1.83425e-07	-5.69223e-06	-1.47548e-05	-1.25958e-05	-1.32082e-05	-8.79504e-06	-1.13928e-05	-2.94101e-06	-1.66767e-05	-1.38588e-05	-1.08671e-05	-1.35158e-05	-2.18577e-06
-4.35293e-07	5.07743e-07	1.33721e-05	-1.92367e-06	5.55308e-06	4.86295e-06	5.50266e-06	-3.65466e-07	8.81367e-06	-6.34122e-08	-1.14401e-05	5.851e-09	-5.66898e-06	-3.4344e-06	-3.67141e-06	-3.93548e-06	-1.46979e-05	-2.30253e-05	-1.48474e-05	-1.36873e-05	-2.28922e-05	-1.50022e-05	-1.16047e-05	-1.56252e-05	-1.91014e-05	-2.15603e-05	-1.41061e-05	-2.38647e-05	-1.78456e-05	-2.03521e-05	-1.82008e-05	-1.54034e-05	-2.28309e-05	-2.28578e-05	-2.51489e-05	-2.21064e-05	-2.59741e-05	-2.03332e-05	-1.23834e-05	-1.87934e-05	-2.11513e-05	-2.85207e-05	-2.22747e-05	-1.68553e-05	-1.78706e-05	-2.09784e-05	-1.42409e-05	-1.86815e-05	-2.31224e-05	-1.37709e-05
-7.7746e-07	4.25415e-06	7.203e-06	4.43101e-07	-9.01839e-06	-3.66275e-06	1.15707e-06	5.89653e-07	-8.37012e-06	1.19438e-06	-2.46503e-07	-4.91849e-06	-4.51749e-06	-7.11898e-06	-1.3506e-05	-6.4581e-06	-1.3162e-05	-1.23212e-05	-1.3029e-05	-2.00945e-05	-1.27975e-05	-1.60262e-05	-7.09591e-06	-5.06052e-06	-1.28879e-05	-1.9528e-05	-8.42384e-06	-6.65125e-06	-8.11483e-06	-9.8961e-06	-4.82864e-06	-7.96491e-06	-7.4968e-06	-1.29031e-05	-9.68468e-06	-6.01004e-06	-1.4705e-05	-1.13572e-05	-4.13431e-06	-1.27869e-05	-6.48369e-06	-1.48608e-05	-1.75096e-05	-1.53001e-05	-1.42297e-05	-1.59569e-05	-6.19191e-07	-9.72324e-06	-1.42564e-05	-1.45614e-05
-4.66708e-06	-8.79182e-08	5.62713e-06	1.59562e-06	-7.79558e-06	-4.14674e-06	-1.81921e-06	2.15725e-06	-1.05573e-05	1.54911e-06	5.27062e-06	-5.15327e-06	-4.48169e-06	-4.61807e-06	-1.07652e-05	-2.69428e-06	-9.49108e-06	-5.29177e-06	-7.50734e-06	-7.0723e-06	-5.15986e-06	-6.74984e-06	-6.7921e-06	-2.29254e-06	-3.73603e-06	1.4201e-06	-3.13102e-06	5.56659e-06	1.8029e-06	3.96066e-07	1.24447e-05	3.77976e-06	1.79112e-06	-5.38256e-06	-1.4829e-06	2.08062e-06	-2.78548e-06	-2.13252e-06	5.40345e-07	-2.01431e-06	6.88564e-06	-2.60526e-06	2.41772e-06	1.15289e-06	-1.94235e-06	-6.23255e-06	3.56682e-06	-4.98105e-07	1.42732e-06	-4.89821e-06
-1.25365e-06	8.63321e-07	-2.8129e-06	6.32781e-07	1.93533e-06	5.55317e-06	6.14296e-07	8.88206e-06	3.44383e-06	2.45369e-06	8.06068e-07	-3.5491e-06	2.85434e-06	-5.70991e-06	-2.28354e-06	-1.57351e-05	4.29028e-06	-7.8234e-06	-9.63895e-06	2.85482e-06	-6.90317e-06	-1.04056e-05	-9.91868e-06	5.03026e-06	3.83477e-06	3.72304e-06	8.35815e-07	4.09097e-07	-1.89699e-07	1.00395e-05	1.29313e-05	7.02806e-06	1.1781e-05	-1.73162e-06	-1.78025e-06	9.3077e-06	5.97155e-06	9.03629e-06	8.47577e-06	4.39248e-06	1.06808e-05	4.30156e-06	9.91827e-06	7.61315e-07	-2.31737e-06	-1.36466e-06	2.32042e-07	2.47157e-06	5.45766e-06	-1.69351e-06
3.80048e-07	-4.84027e-06	-1.36032e-06	-1.26159e-06	2.99037e-06	2.9653e-06	5.71282e-06	-4.13629e-06	6.95268e-06	-5.66783e-06	8.46419e-06	6.38837e-06	7.119e-06	-4.5806e-06	-2.97957e-07	-1.19755e-05	-5.51867e-06	-4.44972e-06	-4.04631e-06	-7.93178e-06	-4.09932e-06	-2.7978e-06	-1.43224e-06	3.1834e-06	1.56716e-06	-3.46896e-06	4.97073e-06	6.16374e-06	-1.61973e-06	6.45758e-06	1.21893e-05	2.31467e-06	7.09912e-06	-4.19287e-06	3.21039e-06	-2.4166e-07	7.68724e-06	5.17896e-06	8.2481e-06	6.49555e-06	2.9469e-06	-1.23112e-06	2.59056e-07	5.19617e-06	-3.24328e-07	7.29855e-07	6.10916e-06	6.6196e-06	4.06374e-06	2.17853e-06
-8.55727e-08	-5.96961e-06	3.08118e-06	-8.71425e-07	-1.98452e-06	2.43949e-06	5.99202e-06	-2.84715e-06	4.02962e-06	-8.80668e-06	6.36939e-06	3.24676e-06	6.47645e-06	-1.88739e-06	-2.83505e-06	-1.05861e-05	-8.34915e-06	-5.34231e-06	2.19952e-07	-1.03469e-05	-6.66796e-06	-4.78285e-06	-3.83793e-06	2.93862e-06	-7.34511e-06	-9.64017e-06	-5.62395e-08	4.4246e-06	-6.51852e-06	-1.6191e-06	9.15613e-06	2.54134e-06	2.87603e-06	-5.1596e-06	4.34335e-06	-3.83831e-06	-1.04769e-07	-2.59254e-06	3.22518e-06	6.6058e-06	4.86315e-06	-2.42678e-06	-1.77443e-06	5.13329e-06	-7.10889e-08	-9.55884e-07	5.44096e-06	3.36435e-06	2.88528e-06	5.21186e-06
-3.48946e-06	1.7999e-06	-4.52118e-06	4.31258e-06	-6.86895e-06	2.07352e-06	-1.29323e-06	3.04907e-06	-2.72076e-06	7.30917e-07	-1.77308e-06	-1.17542e-05	4.15116e-06	-1.01032e-05	-1.39626e-05	-3.14909e-06	-1.15562e-05	-5.32882e-06	-7.94554e-06	-1.70412e-06	-7.21199e-07	-7.05174e-06	-5.39243e-06	4.53265e-06	-6.03254e-07	-1.40234e-05	4.74502e-07	2.52362e-06	-2.09046e-06	2.72717e-06	-3.5465e-06	-3.58008e-06	-5.18637e-07	-1.46335e-06	-7.99485e-07	-3.06285e-06	-7.62949e-06	1.9795e-07	6.20299e-07	5.0397e-06	2.34811e-06	2.38561e-06	6.13945e-08	-5.11898e-08	-2.62119e-06	-3.64141e-07	2.70411e-06	1.80449e-06	-2.73008e-06	1.03879e-06
2.14527e-06	5.45325e-06	4.78898e-06	6.77598e-06	-8.6765e-07	-9.50484e-06	-1.48528e-06	-1.76913e-06	3.99158e-06	-1.12514e-06	2.02471e-07	1.93476e-06	5.4188e-06	-1.99e-06	-1.18411e-05	-4.25215e-06	5.92265e-06	2.36927e-07	-1.17966e-06	1.26849e-06	1.91097e-07	1.37371e-07	9.24728e-06	2.43302e-06	-1.8408e-06	-5.54804e-06	2.8176e-06	8.87693e-06	-2.47495e-06	4.1215e-06	6.04255e-06	-7.27022e-06	-2.72187e-06	7.34897e-06	4.34202e-07	-9.17494e-07	7.08633e-06	1.96629e-06	1.43904e-06	-1.16604e-06	-3.75359e-06	2.1847e-06	4.77851e-06	2.12929e-06	3.70211e-06	3.05888e-06	6.4333e-06	-7.69884e-08	-6.49068e-07	9.02765e-07
7.05088e-07	4.95061e-06	3.39234e-06	4.32346e-07	-2.68559e-06	8.38258e-07	-4.77762e-06	-5.69923e-06	5.70297e-06	-3.41082e-06	-1.44361e-05	-8.85053e-06	-6.5525e-06	7.81022e-07	-1.51453e-05	-1.90637e-06	5.24722e-07	-1.69445e-06	-2.13606e-06	-1.38056e-06	-6.00149e-06	3.24532e-07	-8.93105e-06	-2.80867e-06	-4.98499e-06	-3.46778e-06	-1.01058e-05	3.12216e-06	-6.81529e-06	-1.2063e-05	-1.68688e-07	-8.91197e-06	-6.98766e-06	-1.14657e-05	-9.1221e-06	-1.02945e-05	-5.98588e-06	-1.52367e-05	-9.75179e-06	-1.21357e-05	-1.15057e-05	-1.3402e-07	-1.51911e-05	-6.03012e-06	-8.65103e-06	3.17806e-06	6.8687e-07	-1.2491e-06	-4.12514e-07	7.24345e-07
-1.4648e-06	3.17402e-06	5.00514e-07	1.5787e-06	-9.64001e-06	-3.42062e-06	5.63581e-06	-2.47773e-06	4.60366e-06	-4.35955e-06	1.08644e-06	2.86431e-06	-1.05631e-05	-1.48335e-06	-6.44574e-07	2.91876e-06	-5.72092e-07	2.83041e-06	5.0701e-06	1.84932e-06	8.46855e-06	1.06945e-05	1.4034e-05	1.73255e-05	9.34706e-06	7.17272e-06	7.63778e-06	1.36259e-05	2.57941e-05	9.49696e-06	1.48802e-05	1.24095e-05	1.65896e-05	7.20722e-06	1.69925e-05	2.53702e-05	6.52167e-06	1.15217e-05	9.03425e-06	1.30295e-05	1.15329e-05	1.38541e-05	7.48863e-06	1.75663e-05	2.71602e-06	7.85166e-06	1.3044e-05	2.09053e-05	6.97693e-06	9.88448e-06
-3.61606e-06	-1.11461e-05	-1.71491e-06	4.61079e-06	7.11802e-06	-2.79394e-06	9.84127e-06	-5.53443e-07	-1.33192e-06	3.47017e-06	8.64109e-06	-1.40322e-06	1.50335e-06	-5.99378e-07	3.8995e-07	1.10589e-05	-1.81523e-06	7.44938e-06	-4.45374e-06	4.78376e-07	7.47205e-06	2.24164e-06	4.70805e-06	3.72144e-06	7.87647e-06	1.31365e-05	1.2391e-05	1.59759e-05	1.24008e-05	1.59712e-05	1.45662e-05	1.13903e-05	1.51106e-05	1.7543e-05	1.73877e-05	1.4745e-05	1.16251e-05	1.24758e-05	1.61748e-05	1.71759e-05	2.0378e-05	2.53315e-05	1.61318e-05	7.24635e-06	1.39213e-05	1.88443e-05	1.8736e-05	2.14595e-05	1.67538e-05	8.30607e-06
2.59667e-06	-2.74961e-06	-5.27183e-06	4.26529e-06	1.30924e-06	-4.29116e-06	-3.95316e-06	-2.55923e-06	-3.92964e-06	3.79739e-06	5.09235e-06	-9.46184e-07	-5.13595e-06	-6.56584e-06	2.25755e-06	1.06531e-05	-5.86532e-07	6.4802e-06	4.15143e-06	7.5995e-07	3.2598e-06	8.26856e-06	8.18543e-06	2.38792e-07	1.11347e-05	8.71051e-06	6.43559e-06	-3.76183e-06	4.91724e-06	1.07884e-05	9.8745e-06	1.46464e-06	-1.41537e-06	1.20541e-05	5.33202e-06	9.61714e-06	5.42696e-06	4.54435e-06	9.53674e-06	1.81546e-05	8.99828e-06	6.71627e-06	4.9495e-06	2.09287e-06	1.51236e-05	8.72784e-06	8.72259e-06	9.83239e-06	9.67522e-06	7.23775e-06
-1.14784e-05	-2.08578e-06	-4.87293e-06	-8.69139e-07	7.69441e-06	-6.09226e-06	-1.84005e-07	7.6697e-07	-4.31887e-06	-6.80515e-06	3.49384e-06	-3.10772e-06	1.6458e-07	-5.12112e-06	-7.53483e-07	-2.84667e-06	6.32762e-06	1.33769e-05	9.62107e-06	1.19692e-05	6.80118e-06	1.82501e-05	2.15072e-05	7.30964e-06	2.24112e-05	1.81434e-05	1.8016e-05	1.26496e-05	1.36882e-05	8.54948e-06	1.07208e-05	2.33424e-05	2.05502e-05	1.79591e-05	1.39857e-05	5.88747e-06	2.21046e-05	9.32413e-06	1.59438e-05	2.10726e-05	1.81227e-05	1.91441e-05	1.46484e-05	1.10366e-05	1.51953e-05	1.48669e-05	1.44403e-05	2.51798e-05	1.7781e-05	1.0654e-05
3.77813e-06	-9.3566e-06	-2.01817e-06	1.37367e-05	-8.68551e-06	-1.04068e-05	-4.98946e-06	-5.31339e-09	-8.18024e-06	1.41597e-05	3.56516e-06	-1.82623e-06	-5.67385e-06	6.00431e-07	1.67283e-05	6.4667e-06	7.84368e-06	7.09589e-06	2.44793e-06	1.53099e-05	1.63126e-05	1.85034e-05	1.21376e-05	-2.95129e-07	1.15406e-05	2.11541e-05	1.25742e-05	1.11423e-05	1.2356e-05	1.78455e-05	6.55453e-06	1.49142e-05	1.67951e-05	1.9161e-05	1.35983e-05	2.05296e-07	9.0276e-06	2.10628e-05	7.67539e-06	1.18116e-05	2.91306e-05	7.56064e-06	1.41141e-05	2.16284e-05	1.7445e-05	2.45403e-05	9.56158e-06	1.47172e-05	1.3289e-05	6.17457e-06
-1.30942e-06	2.69656e-07	-2.40239e-07	9.22977e-06	1.65191e-05	-1.22957e-05	-3.73564e-06	-4.28835e-07	3.77438e-06	1.36551e-06	2.817e-06	5.10446e-06	7.85035e-06	-6.80308e-07	1.79161e-05	1.1207e-05	1.28095e-05	1.22728e-05	1.59152e-05	3.06094e-05	2.50265e-05	2.7646e-05	2.25435e-05	2.42715e-05	1.67079e-05	3.06952e-05	3.08303e-05	1.37295e-05	2.67597e-05	3.03114e-05	2.70321e-05	2.47363e-05	1.90882e-05	2.18514e-05	2.5883e-05	2.6773e-05	2.30433e-05	2.34682e-05	2.15995e-05	2.76401e-05	2.2475e-05	2.15615e-05	3.01202e-05	1.9549e-05	2.0159e-05	2.67159e-05	2.2787e-05	1.87941e-05	1.65537e-05	2.53057e-05
-8.74579e-06	-6.0623e-07	-9.01593e-06	-7.3414e-06	-4.78142e-06	9.25164e-06	-1.03083e-06	-3.22641e-06	7.10086e-06	3.2652e-06	-3.80065e-06	1.57321e-06	5.15518e-06	4.28564e-06	2.78811e-06	1.48386e-05	1.69685e-05	1.13239e-05	6.91694e-06	1.99253e-05	1.59525e-05	2.20791e-05	1.90573e-05	1.81861e-05	2.72731e-05	2.8686e-05	2.13001e-05	2.16243e-05	2.14949e-05	1.56651e-05	2.1653e-05	2.12111e-05	2.92467e-05	1.64004e-05	2.9197e-05	2.1699e-05	2.17325e-05	2.37008e-05	2.57452e-05	2.78637e-05	3.11792e-05	3.28266e-05	1.62987e-05	3.42244e-05	2.94093e-05	2.12048e-05	2.20139e-05	1.68542e-05	1.46655e-05	2.67255e-05
-2.4275e-06	-2.45329e-06	-1.20575e-05	-1.36041e-05	-1.61398e-06	2.09062e-06	2.80168e-06	-6.40528e-06	-1.35983e-05	2.62689e-07	-2.13123e-06	-6.65441e-06	3.35866e-06	3.68093e-06	8.07957e-06	6.67696e-06	2.35781e-06	1.13568e-05	1.14128e-05	1.61152e-05	2.19828e-05	1.47382e-05	2.772e-05	1.81168e-05	1.34711e-05	3.36275e-05	1.15561e-05	1.40641e-05	2.06492e-05	9.57229e-06	1.69022e-05	2.04153e-05	2.68642e-05	1.30776e-05	1.76165e-05	2.5993e-05	1.5761e-05	1.83476e-05	1.97583e-05	2.57198e-05	2.79392e-05	2.04009e-05	1.58249e-05	2.98689e-05	2.06703e-05	2.20404e-05	1.91518e-05	2.71506e-05	2.08719e-05	1.83642e-05
1.00235e-05	-3.05384e-06	-2.69495e-06	-4.82312e-06	-2.47889e-06	-4.54105e-06	-3.39843e-06	1.39762e-06	-1.21989e-05	7.43344e-06	3.5287e-06	4.64368e-07	3.02737e-06	-4.88682e-06	1.0026e-05	1.04933e-05	6.23167e-06	1.63804e-05	3.5555e-06	2.3839e-05	2.24189e-05	1.48198e-05	1.68812e-05	1.87331e-05	2.18287e-05	2.71929e-05	1.92551e-05	1.68914e-05	2.7879e-05	2.61051e-05	2.80041e-05	2.09742e-05	2.46923e-05	3.05303e-05	2.35863e-05	1.80545e-05	2.31157e-05	3.48543e-05	2.73058e-05	2.15688e-05	2.1968e-05	2.07583e-05	2.99117e-05	2.0892e-05	2.25936e-05	2.4503e-05	2.036e-05	1.75768e-05	1.68876e-05	2.74477e-05
-1.66922e-06	8.0031e-06	1.01989e-06	-5.17925e-06	4.51416e-06	2.93988e-06	1.33938e-06	9.10706e-06	-1.9768e-06	-9.29355e-06	-2.46541e-06	4.896e-06	3.4752e-07	1.31131e-05	8.04752e-06	1.56675e-05	9.42937e-06	2.36742e-05	1.53748e-05	3.02726e-05	2.04709e-05	2.28364e-05	2.72731e-05	3.06722e-05	2.14235e-05	4.11411e-05	2.87765e-05	2.94659e-05	3.72008e-05	2.58468e-05	3.13807e-05	4.21291e-05	1.58451e-05	2.93172e-05	3.51469e-05	2.64647e-05	3.14364e-05	3.24746e-05	2.97774e-05	2.69084e-05	2.58616e-05	2.35775e-05	3.37128e-05	2.63427e-05	3.16237e-05	4.00529e-05	3.95876e-05	3.60193e-05	3.74389e-05	1.97208e-05
1.02912e-05	4.24531e-06	1.46937e-05	1.76405e-06	8.75654e-06	-1.67622e-05	-4.96247e-06	7.18663e-06	-1.57663e-06	6.24699e-06	-6.08357e-06	1.05933e-07	1.21874e-05	7.73645e-06	1.29691e-05	1.25711e-05	2.23183e-05	2.43379e-05	1.04514e-05	3.26865e-05	2.18436e-05	3.17671e-05	3.93493e-05	2.71687e-05	2.73871e-05	4.57508e-05	3.06513e-05	3.37334e-05	3.31003e-05	5.04283e-05	4.42592e-05	3.58133e-05	3.96347e-05	3.32794e-05	3.76089e-05	4.48226e-05	3.52783e-05	3.69211e-05	3.87466e-05	3.0242e-05	2.91408e-05	4.39247e-05	4.36487e-05	3.44145e-05	3.76064e-05	3.89062e-05	5.14561e-05	4.41016e-05	3.75194e-05	4.03451e-05
2.63079e-06	1.25328e-05	-1.95604e-06	3.93143e-06	-1.19838e-05	-1.16307e-05	-2.11793e-06	-2.74069e-06	-2.11504e-06	-6.84697e-06	5.25147e-06	-3.69895e-07	6.03393e-06	1.50295e-05	1.36654e-05	2.39732e-05	1.174e-05	2.78017e-05	1.86067e-05	1.43923e-05	2.61683e-05	1.99547e-05	3.07156e-05	3.88293e-05	1.89464e-05	2.92133e-05	2.39951e-05	3.24776e-05	2.74438e-05	3.19866e-05	3.18826e-05	2.5553e-05	2.6279e-05	3.7452e-05	2.04389e-05	2.84808e-05	2.87143e-05	2.47542e-05	3.603e-05	2.01024e-05	2.6594e-05	3.49378e-05	3.05069e-05	2.3461e-05	2.00126e-05	2.27254e-05	2.5314e-05	2.48206e-05	3.18184e-05	1.72743e-05
4.99811e-06	2.88254e-06	-3.30882e-06	4.51556e-06	-5.71829e-06	1.86813e-06	-7.15526e-06	-2.50524e-06	4.08743e-07	-6.13481e-06	1.00817e-06	-2.54279e-06	4.21695e-06	7.91278e-06	4.99865e-06	4.71128e-06	1.75267e-05	1.37141e-05	4.13085e-06	1.36447e-05	7.28481e-06	8.60959e-06	1.13862e-05	1.98648e-05	2.0682e-05	2.0044e-05	1.62077e-05	1.31524e-05	2.11798e-05	1.15709e-05	2.32789e-05	1.13613e-05	1.68031e-05	1.2886e-05	2.26481e-05	1.18199e-05	2.45299e-05	3.21632e-05	9.62245e-06	1.8372e-05	1.96872e-05	2.10266e-05	2.00024e-05	2.02721e-05	1.63535e-05	2.05296e-05	1.74238e-05	1.49057e-05	1.6682e-05	4.78286e-06
2.38343e-06	-2.57858e-06	-1.21442e-05	4.9974e-07	1.16765e-05	-7.6716e-06	6.19779e-06	7.66204e-06	-1.24801e-05	-1.05062e-05	-6.97295e-06	4.04324e-07	9.48355e-07	5.8638e-06	1.43298e-05	8.3346e-06	1.68105e-05	1.40052e-05	1.20109e-05	1.14705e-05	2.20726e-05	2.37027e-05	2.43848e-05	2.85098e-05	2.24298e-05	2.74068e-05	2.23953e-05	2.72402e-05	1.03445e-05	2.23294e-05	2.15396e-05	2.55558e-05	2.08314e-05	2.41881e-05	2.25316e-05	2.5034e-05	3.15587e-05	3.17011e-05	1.48537e-05	2.64553e-05	2.83131e-05	3.60031e-05	2.07902e-05	2.54041e-05	2.44504e-05	3.06688e-05	2.25059e-05	2.4411e-05	2.09656e-05	1.64498e-05
-2.4977e-06	1.4073e-06	-9.36293e-06	7.92639e-06	3.84883e-06	-5.02172e-06	5.22264e-06	3.08018e-07	-4.9944e-07	-3.51096e-06	3.66831e-06	-1.3077e-06	8.70366e-06	1.81573e-06	2.52463e-06	8.49314e-06	9.89342e-06	4.52658e-06	1.90164e-05	1.17843e-05	1.9348e-05	2.22711e-05	8.71332e-06	1.34483e-05	1.21637e-05	1.15475e-05	7.98577e-06	1.55161e-05	7.89674e-07	9.19048e-06	6.89343e-06	1.58918e-05	1.26546e-05	2.72031e-05	1.84308e-05	5.46699e-06	1.05845e-05	1.56463e-05	1.43533e-05	1.9216e-05	1.08507e-05	2.01452e-05	1.76995e-05	1.68774e-05	1.80508e-05	5.88344e-06	2.05111e-05	1.32194e-05	1.964e-05	2.08827e-05
-2.95065e-06	6.54604e-06	-4.44748e-06	7.28038e-07	5.20796e-06	-3.99033e-07	2.38277e-06	6.26802e-06	3.32497e-07	-3.98284e-06	5.5685e-06	-6.77488e-06	2.49499e-06	-3.01156e-07	1.34757e-05	1.08385e-05	1.51817e-05	2.46192e-05	1.77748e-05	8.20737e-06	1.48094e-05	1.845e-05	-3.3996e-06	1.07642e-05	1.009e-06	8.58588e-06	5.96751e-06	1.18941e-05	1.39686e-05	1.01227e-05	1.33417e-05	1.73902e-05	1.55975e-05	2.03547e-05	1.3552e-05	7.60032e-06	9.98907e-06	1.09623e-05	1.41434e-05	1.98266e-05	1.14877e-05	1.71995e-05	1.24377e-05	1.11526e-05	1.71933e-05	8.29758e-06	1.32071e-05	1.66715e-05	1.63255e-05	1.29363e-05
-4.02543e-06	-4.86602e-06	-6.74478e-06	1.64052e-06	1.19021e-05	5.10743e-06	-3.34559e-06	-4.81532e-07	-3.28427e-06	-3.79127e-06	1.16234e-05	5.33673e-06	1.05933e-06	6.27615e-06	1.26943e-05	-2.58814e-06	1.15248e-05	2.10826e-05	1.11538e-05	3.39951e-06	7.48332e-06	1.09631e-05	6.97193e-06	1.52548e-05	8.91459e-06	8.27202e-06	5.20688e-06	1.36792e-05	1.88299e-05	1.37163e-05	9.35023e-06	7.53913e-06	8.55501e-06	2.61319e-06	1.35388e-06	7.33995e-06	1.00928e-05	7.66511e-06	9.16528e-06	1.73509e-05	1.07023e-05	1.07755e-05	5.41613e-06	7.55371e-06	1.30488e-05	1.07101e-05	8.81193e-06	1.40829e-05	6.12848e-06	2.27396e-05
-1.88623e-06	-1.13116e-05	-6.99805e-06	7.02718e-06	3.66096e-06	-2.86561e-06	-1.85705e-06	5.68954e-06	-3.24303e-06	2.16163e-06	3.18966e-06	1.17374e-05	4.69693e-06	1.28607e-05	1.13926e-05	-3.89624e-06	5.98491e-06	1.11135e-05	1.42948e-05	2.54815e-06	8.26598e-06	4.57801e-06	1.13035e-05	1.17234e-05	-3.26622e-06	7.33589e-06	-6.25749e-07	8.90468e-06	1.71113e-05	-2.36082e-06	-5.70343e-06	5.81254e-06	-3.22704e-06	-2.68643e-06	2.14252e-06	-3.18088e-06	2.5042e-06	-4.00375e-06	3.016e-06	-3.32928e-06	-3.26255e-06	1.8318e-06	-4.53151e-07	-7.10925e-06	1.77002e-06	6.35648e-06	5.86273e-06	-5.26682e-06	6.31116e-06	4.5804e-06
-1.14973e-05	-5.95787e-06	3.89275e-06	-1.08773e-05	-6.14063e-06	-1.81459e-06	-1.11857e-06	-1.2824e-06	-4.13227e-06	9.77583e-06	1.60684e-06	1.64335e-05	-2.15861e-06	6.8936e-06	6.73785e-06	4.58649e-06	1.73148e-05	1.675e-05	1.55061e-05	3.72931e-06	1.59131e-05	2.06734e-05	2.77942e-05	1.74466e-05	4.54632e-06	1.50503e-05	8.9716e-06	1.31667e-05	1.72781e-05	4.49818e-06	1.11723e-05	8.47179e-06	9.63824e-06	8.78495e-06	1.3123e-05	5.81319e-06	1.36168e-05	6.25681e-06	1.08495e-05	7.45852e-06	4.09433e-06	1.90067e-05	6.44127e-06	4.39234e-06	1.34963e-05	1.1061e-05	1.17756e-05	8.18875e-06	1.87569e-05	2.51854e-06
-8.69162e-06	-8.16721e-06	7.62023e-06	-5.16719e-06	6.60847e-06	3.36444e-06	-7.6698e-06	3.68741e-07	-5.15317e-06	1.81293e-05	-3.11005e-06	1.26241e-06	4.72102e-06	4.28903e-06	-1.10266e-07	1.61058e-05	4.34409e-06	5.98814e-06	6.30024e-06	-3.3105e-06	1.53202e-06	-4.23778e-06	-6.3577e-06	-2.10206e-06	-5.81458e-06	-4.05736e-06	-1.48727e-05	-5.10274e-06	-1.36707e-05	5.21293e-06	-1.83494e-05	-1.31432e-05	-1.61918e-05	-5.62355e-06	-1.65655e-05	-1.82934e-05	-4.93553e-06	-1.44507e-05	-6.55323e-06	-1.29458e-05	-1.45493e-05	-1.54392e-05	-9.98809e-06	-1.02511e-05	-1.18681e-05	-2.61769e-05	-5.26697e-06	-9.0597e-06	-1.50261e-05	-8.49377e-06
3.92928e-06	-4.64665e-06	-1.77291e-06	-9.59907e-06	-6.87907e-06	-6.95628e-07	-3.52202e-06	6.88846e-07	3.21831e-06	6.76047e-06	-4.8439e-06	-7.83253e-07	8.64227e-07	6.77689e-06	7.20112e-06	1.19126e-05	1.24398e-05	3.83804e-06	3.62024e-06	3.04769e-06	2.10628e-06	1.10392e-06	5.4972e-07	2.90177e-06	1.94196e-07	7.30129e-07	-2.68149e-06	-1.54525e-05	-9.55886e-06	-8.88591e-06	-8.45299e-06	-8.07798e-06	-1.25673e-05	-1.26659e-05	-1.78387e-05	-1.47915e-05	-1.10196e-05	-1.16687e-05	-1.33283e-05	-2.63825e-06	-9.91906e-06	-5.75566e-06	-4.75701e-06	-1.4773e-05	-4.75369e-06	-1.837e-05	-1.25701e-05	-1.28205e-05	-1.00723e-05	1.83229e-06
1.72157e-06	9.18508e-06	-2.36068e-06	-3.81648e-06	-7.10028e-06	-1.41656e-06	-6.92568e-07	-5.74865e-06	-9.15067e-07	4.43682e-06	-7.36922e-06	-1.61208e-07	-6.25689e-06	-1.12442e-06	8.10392e-06	1.60054e-05	1.07364e-05	1.34421e-05	9.95186e-06	2.29008e-05	1.14038e-05	1.07054e-05	4.18643e-06	1.06636e-05	1.41605e-05	1.36746e-05	6.755e-06	4.70379e-06	4.68039e-06	-4.75487e-06	8.41694e-06	3.08204e-07	9.33562e-07	-3.66277e-06	-4.97678e-06	6.64612e-06	6.54498e-06	-1.02858e-06	-2.16123e-06	7.97956e-07	1.33295e-06	-8.95628e-07	1.36717e-06	3.62885e-06	9.23992e-07	-1.83474e-06	1.86548e-06	6.99552e-07	2.20279e-06	-3.35158e-06
1.39781e-06	-9.28245e-06	-5.13745e-06	-1.23943e-05	3.80869e-06	-1.00378e-07	8.57319e-06	-1.37075e-06	-2.22019e-06	5.35562e-06	7.73273e-07	-6.67702e-06	-1.28948e-06	-3.75435e-06	-5.00906e-06	1.46875e-05	8.95024e-06	1.60633e-06	5.92405e-06	1.29782e-05	1.88998e-05	9.98962e-06	-2.77618e-06	8.31e-06	6.72484e-06	-1.50045e-06	-1.53809e-06	1.31827e-05	-1.57864e-06	-3.78968e-06	2.89702e-06	8.97146e-07	-2.90044e-06	-8.47411e-06	-2.61267e-07	-2.69536e-06	-2.0163e-06	6.51832e-06	-2.50992e-06	-3.96024e-06	-4.14503e-06	-3.70321e-06	8.06434e-06	3.32296e-06	-5.0354e-07	4.8907e-06	-1.32663e-06	-1.02393e-06	1.5163e-06	-1.4405e-06
-6.66713e-06	2.85852e-07	-6.72634e-06	-1.14329e-05	4.73403e-08	-1.07419e-06	-3.3204e-06	-4.88359e-06	3.31732e-06	5.26204e-06	-1.51851e-06	3.49122e-06	1.14331e-06	5.58576e-06	8.97254e-06	7.5657e-06	5.13703e-06	7.43243e-06	4.08768e-06	1.07024e-05	8.38953e-06	4.0563e-06	4.14414e-06	8.60868e-06	-4.61456e-07	8.71091e-06	-2.05751e-07	1.21519e-05	-6.5639e-06	6.68637e-06	3.29096e-06	4.52716e-06	1.85742e-06	4.49137e-06	5.17711e-06	2.08345e-06	-1.85717e-06	8.38716e-06	-4.02833e-06	5.39481e-06	-7.81167e-07	3.26104e-06	7.36802e-06	4.51431e-06	2.74406e-06	7.03409e-06	-2.45899e-06	5.53981e-06	3.52567e-06	2.80596e-06
6.98199e-06	3.9938e-06	-2.97738e-06	-9.82154e-06	-3.39979e-06	-2.3082e-06	-1.00918e-05	-6.35946e-06	7.23219e-07	-3.57696e-06	-1.31492e-06	5.45561e-06	-2.22442e-06	5.32175e-06	-1.76593e-06	4.85503e-06	3.15737e-06	6.77126e-06	6.8813e-06	9.03254e-06	6.32418e-06	4.76649e-06	2.49273e-07	2.38441e-06	-1.00591e-06	-4.436e-06	5.55132e-06	1.9565e-06	-5.68772e-06	-1.7829e-06	4.75669e-07	-4.37901e-06	1.5133e-06	-2.95456e-06	-5.13996e-06	-4.49939e-06	3.82842e-06	5.88775e-07	-1.45403e-06	-3.92688e-07	-4.99964e-06	-7.46007e-07	2.91395e-06	-6.14853e-07	-2.80474e-06	4.37893e-06	4.52234e-06	3.56847e-06	-4.99448e-06	-2.71424e-06
6.52443e-06	-3.17048e-06	-2.44766e-06	-1.2848e-05	-9.60389e-06	1.81193e-07	-3.33978e-06	-1.70303e-06	3.14646e-06	-3.67798e-06	-2.06798e-06	3.96603e-06	2.62627e-06	3.07801e-06	7.51932e-06	1.68777e-06	6.60593e-06	5.07616e-06	3.80248e-06	3.59076e-06	5.63883e-06	6.31981e-06	-8.94877e-06	-4.61891e-06	7.16376e-06	-2.9494e-06	3.07585e-06	-7.14321e-06	-7.39603e-06	-7.0153e-06	1.07656e-06	-8.69762e-06	4.55298e-06	-1.67289e-06	-3.62844e-06	-5.26652e-06	7.11202e-06	1.52265e-06	1.1061e-06	-1.006e-05	-7.14562e-06	-1.61488e-06	7.08755e-07	-6.79484e-06	-6.8202e-06	-4.87274e-06	-4.99222e-07	-4.45979e-06	3.53847e-06	-9.74025e-06
-8.19436e-06	2.5642e-07	-7.92703e-07	-1.89982e-06	-8.21685e-06	2.32636e-07	3.89137e-06	-1.84203e-06	-1.59195e-06	8.50364e-06	-7.10808e-07	-2.46211e-06	-2.44797e-06	4.03811e-06	1.79601e-06	5.42068e-07	1.87919e-06	4.12123e-06	-2.72935e-06	-8.10302e-06	2.27808e-06	4.74791e-06	-1.02053e-05	-7.90115e-06	1.43849e-06	-1.10644e-05	8.11477e-07	-5.66e-06	-5.51089e-06	-3.20993e-06	-8.57127e-06	-1.28062e-05	-9.92691e-06	5.11417e-06	-5.05488e-06	-8.06816e-06	-3.45393e-06	1.05366e-06	-8.78896e-06	-1.18749e-05	-5.35409e-07	-2.98216e-06	-3.28686e-06	-6.63795e-07	-1.3772e-05	1.47835e-07	-6.24316e-06	-6.53967e-06	-9.28832e-06	-7.45073e-06
-7.61273e-07	-3.2147e-06	2.5941e-06	-8.46187e-06	-5.62148e-06	1.10386e-05	-6.68684e-06	-3.98251e-06	2.54339e-06	2.35735e-06	-6.31259e-06	-5.95896e-06	-2.78855e-06	5.14562e-06	3.0925e-07	3.31612e-06	2.95805e-06	3.7601e-06	-4.72323e-06	3.28542e-06	-1.60716e-06	5.47498e-06	-1.00896e-07	-5.0052e-06	1.10432e-06	3.62109e-06	-5.06038e-06	1.4563e-06	-4.72026e-06	-4.44641e-07	-7.45892e-06	-1.06293e-06	-6.76435e-06	1.4156e-06	9.78863e-07	-3.16166e-06	-8.19595e-06	-9.94008e-06	-8.52299e-06	-4.69839e-06	-8.52278e-06	-5.23095e-07	-9.95332e-07	-4.39624e-06	-7.68494e-06	1.59993e-06	-3.85847e-06	-3.23139e-06	-4.53463e-06	-8.47614e-06
-1.0205e-05	8.98033e-06	1.67446e-06	-1.14227e-05	-5.00606e-06	8.20809e-06	2.81804e-06	1.96809e-06	4.04518e-06	2.24916e-07	7.99469e-07	-2.497e-06	1.72041e-06	2.24375e-06	1.39727e-06	-3.09219e-06	-5.08247e-07	6.9883e-07	-1.14517e-06	-8.3587e-07	6.74874e-07	8.08666e-06	-8.78408e-08	3.76081e-06	3.03807e-06	-2.09702e-06	-4.03395e-06	-1.79313e-06	7.82115e-07	-7.56023e-06	-6.04464e-06	7.26935e-06	2.26498e-06	1.25692e-06	5.54808e-06	-1.14157e-06	3.74556e-06	-1.93973e-06	-2.56866e-06	1.33729e-06	-3.07807e-06	3.9307e-06	5.26923e-06	5.15791e-06	8.68007e-07	-1.79841e-06	2.62814e-06	-7.08781e-06	6.34387e-06	2.10286e-06
-2.46084e-06	-1.71336e-05	4.71202e-06	1.28223e-06	-1.09772e-05	-4.67855e-06	-2.90156e-06	-1.27508e-06	-4.3923e-06	-5.79574e-06	1.76338e-06	3.90506e-06	-4.05351e-06	6.06276e-06	4.20857e-06	2.79081e-06	6.66635e-06	-1.48939e-05	-8.97246e-06	-1.36205e-05	-1.03179e-05	-4.93153e-06	-1.3784e-05	-1.32035e-05	-8.01713e-06	-7.67909e-06	-1.05141e-05	-1.01116e-05	-1.09147e-05	-1.24791e-05	-1.38171e-05	-1.4422e-05	-1.76003e-05	-8.00504e-06	-1.90896e-05	-2.39343e-05	-7.25948e-06	-2.0767e-05	-2.37914e-05	-1.2454e-05	-1.15803e-05	-2.67379e-05	-1.03704e-05	-1.00408e-05	-1.53811e-05	-1.23182e-05	-1.50302e-05	-1.28232e-05	-2.30082e-05	-2.20608e-05
3.56069e-06	-6.76562e-06	4.93117e-06	3.54046e-07	-3.77871e-06	-7.74499e-06	-3.33717e-06	-1.552e-06	-1.67122e-06	-7.2411e-07	-1.85505e-07	2.10201e-06	-2.42332e-06	-4.08869e-06	-3.82212e-06	5.95246e-07	-6.33871e-07	-1.38879e-05	-6.07355e-06	-1.4057e-05	-2.2393e-05	-2.75765e-05	-2.94181e-05	-2.55848e-05	-2.38638e-05	-2.76291e-05	-3.25402e-05	-2.99175e-05	-3.58483e-05	-2.72246e-05	-3.36564e-05	-3.28877e-05	-3.568e-05	-3.40602e-05	-3.71552e-05	-3.59246e-05	-3.30825e-05	-2.43893e-05	-3.70164e-05	-3.29877e-05	-2.46847e-05	-3.93291e-05	-3.03771e-05	-2.91998e-05	-3.2202e-05	-3.88484e-05	-2.3585e-05	-3.57454e-05	-4.3436e-05	-3.93317e-05
7.60894e-06	8.28215e-06	5.90735e-06	-3.13477e-06	2.89614e-07	-5.80824e-06	2.55235e-06	1.02921e-06	2.08928e-06	-6.33175e-06	1.97534e-07	-2.96381e-06	2.15921e-07	-1.43093e-06	7.03628e-06	-9.66194e-07	-7.27697e-06	-1.80154e-05	-2.56391e-06	-5.46735e-06	-1.23894e-05	-8.71302e-06	-2.55389e-06	-1.68813e-05	-8.03141e-06	-8.43896e-06	-7.93837e-06	-1.62547e-05	-1.03532e-05	-6.08479e-06	-1.19432e-05	-9.96698e-06	-1.67499e-05	-5.69255e-06	-1.6124e-05	-1.76605e-05	-8.29626e-06	-1.1998e-05	-8.52389e-06	-6.92887e-06	-1.20788e-05	-8.77028e-06	-9.447e-06	-9.25995e-06	-1.25927e-05	-2.17035e-05	-7.81229e-06	-1.6968e-05	-1.55548e-05	-1.62336e-05
-6.38403e-06	5.15556e-06	-8.3085e-07	4.26072e-06	2.22502e-05	-8.17462e-07	9.55106e-06	1.32521e-06	6.52654e-06	6.48871e-06	-2.13486e-06	6.37167e-06	-1.43848e-06	-6.98963e-06	6.6666e-06	5.37469e-06	-9.0606e-06	-3.63725e-06	-3.96683e-07	6.28141e-06	-1.59401e-05	-1.20711e-05	-1.31889e-05	-1.82916e-05	-1.1114e-05	-1.06321e-05	5.95453e-07	-3.55831e-06	-1.76264e-05	-7.68719e-06	-1.93809e-05	-1.56904e-05	-1.22484e-05	-1.78944e-05	-1.72942e-05	-1.11123e-05	-1.93989e-05	-1.09096e-05	-1.66884e-05	-1.66439e-05	-1.73554e-05	-1.99854e-05	-1.91138e-05	-4.85057e-06	-1.48215e-05	-1.21245e-05	-1.87925e-05	-1.81661e-05	-7.38968e-06	-1.54596e-05
4.00935e-06	7.72957e-06	-1.50765e-06	-3.75723e-06	1.96511e-05	-1.53579e-06	6.03429e-06	-3.40618e-06	-6.83434e-06	3.08542e-06	-6.27133e-06	8.29135e-07	-7.38604e-07	-5.94455e-06	-2.25217e-06	3.45529e-06	-6.22022e-06	-5.84666e-06	1.76e-07	2.0249e-06	-2.89342e-06	-4.1283e-06	-3.33052e-06	-1.37118e-05	5.56159e-06	-1.96289e-06	-6.41638e-06	-5.93761e-06	-1.52059e-06	4.65783e-06	-5.3176e-06	-7.51506e-06	-2.85837e-06	-5.25888e-06	-9.7724e-06	-4.03537e-06	-8.05153e-06	-1.24842e-05	-1.60505e-05	5.44435e-07	4.14088e-07	-1.15878e-05	-1.51997e-05	-1.23974e-05	-7.79597e-06	-4.27002e-06	-8.32695e-06	-3.43689e-06	-1.18198e-05	-3.34801e-06
-4.58331e-07	5.64156e-06	-3.79881e-06	2.12688e-06	5.69616e-07	-3.46938e-06	6.16356e-06	-6.6854e-06	-5.20814e-06	-6.21196e-06	4.7852e-07	-1.66423e-06	-2.63631e-06	-7.8612e-06	-7.46185e-07	8.80859e-08	-1.07179e-05	-8.74992e-06	1.17195e-06	-1.14789e-05	-4.89861e-06	-1.22122e-07	-9.62605e-06	-1.40356e-05	-2.66661e-06	7.63427e-06	-9.01209e-06	-1.12384e-05	-5.88194e-06	-1.29211e-05	-1.29499e-05	-6.05553e-06	-1.33741e-05	-3.09049e-06	-1.30221e-05	-8.95567e-06	-6.66552e-06	-1.33918e-05	-1.23821e-05	-1.22978e-05	-1.74699e-05	-1.32822e-05	-1.30826e-05	-1.0531e-05	-1.45257e-05	-2.55867e-05	-1.35281e-05	-2.0758e-05	-1.30829e-05	-1.47445e-05
4.94072e-06	9.15061e-06	-6.48717e-06	1.06178e-05	-5.83404e-06	-6.60724e-07	9.24732e-06	-7.52056e-06	1.0799e-05	-8.01316e-06	4.70979e-07	-7.20987e-06	4.79919e-06	-9.54564e-07	-2.76248e-06	-1.53124e-06	1.04022e-06	-8.29551e-06	4.57362e-06	-7.147e-06	-1.37338e-05	-1.73484e-05	-7.87822e-06	-1.67317e-05	-1.61262e-05	1.33269e-06	1.53712e-06	-1.54045e-05	7.15061e-06	-4.71424e-06	-1.63729e-05	-4.7699e-06	8.20005e-07	-1.93605e-06	-8.44448e-06	-2.61545e-05	-5.62126e-06	-9.16219e-06	-1.59429e-05	-7.51792e-06	-1.08674e-05	-2.57847e-05	-1.75208e-06	1.36522e-06	-4.35725e-06	-4.05463e-06	5.53255e-08	-7.52412e-06	-1.60646e-05	-1.66286e-05
6.22096e-06	1.93993e-06	4.17819e-06	1.99565e-06	-8.79178e-06	5.23211e-06	-1.84159e-06	5.5159e-07	-7.9315e-06	-3.23698e-06	-2.18885e-06	2.2277e-06	4.92786e-06	3.3266e-06	-1.63366e-06	-1.16673e-05	-6.19041e-06	-1.61389e-05	-1.81823e-05	-2.57914e-05	-2.2113e-05	-3.055e-05	-2.67291e-05	-2.18499e-05	-3.60922e-05	-3.18216e-05	-3.52428e-05	-3.67409e-05	-3.48917e-05	-3.86182e-05	-5.49406e-05	-3.30252e-05	-4.89943e-05	-4.12218e-05	-4.50939e-05	-4.544e-05	-5.13165e-05	-4.69327e-05	-4.36513e-05	-4.20971e-05	-3.55137e-05	-4.40343e-05	-3.71366e-05	-4.19458e-05	-4.47591e-05	-4.29293e-05	-3.31101e-05	-4.31815e-05	-3.71003e-05	-3.76274e-05
3.65807e-06	7.80232e-06	-3.89718e-06	1.38843e-06	-3.4679e-06	-4.73871e-06	4.81679e-06	-7.96068e-06	-5.52123e-06	1.93575e-06	6.96314e-06	-2.50047e-06	3.20702e-06	1.72368e-06	1.39358e-06	-8.36731e-06	-6.97776e-06	-1.38145e-05	-2.65954e-06	-6.44841e-06	-1.27281e-05	-1.97506e-05	-2.0587e-05	-7.45596e-06	-1.18614e-05	-1.98791e-05	-1.24617e-05	-1.53789e-05	-1.65181e-05	-1.88717e-05	-2.33739e-05	-2.0889e-05	-2.0856e-05	-1.6138e-05	-1.93619e-05	-1.34931e-05	-9.15877e-06	-1.76442e-05	-2.64795e-05	-1.99119e-05	-1.54824e-05	-1.40521e-05	-1.95831e-05	-1.90068e-05	-3.12096e-05	-1.58727e-05	-1.92525e-05	-2.05979e-05	-1.14926e-05	-1.05234e-05
1.35994e-05	2.41527e-06	-6.91242e-06	-1.0262e-05	1.15023e-05	-1.99637e-06	8.24156e-06	-4.00703e-06	-7.07829e-06	6.01165e-06	1.33798e-06	-3.68322e-06	-5.57148e-06	3.17091e-06	-4.54788e-06	-5.94705e-06	-9.41065e-06	-6.88711e-06	-1.20917e-05	5.91736e-09	-1.1764e-05	-9.1238e-06	-1.97878e-05	-1.2521e-05	-2.44962e-05	-2.29744e-05	-1.93851e-05	-1.73375e-05	-9.77157e-06	-1.49756e-05	-5.36218e-06	-3.06293e-05	-1.59098e-05	-8.03743e-06	-1.65376e-05	-9.85687e-06	-1.23484e-05	-1.67414e-05	-2.04424e-05	-2.0973e-05	-1.98218e-05	-7.16324e-06	-1.03896e-05	-2.41195e-06	-1.68226e-05	-1.64885e-05	-2.11921e-05	-2.05214e-05	-2.16462e-05	-6.40075e-06
5.78521e-07	-9.9498e-06	-7.74113e-06	8.1329e-06	4.10182e-06	2.72034e-06	-4.30097e-06	8.29934e-06	3.27058e-06	4.32969e-06	-2.45532e-06	2.46724e-06	-1.22126e-05	4.11211e-06	1.02069e-05	-2.3988e-07	-4.14967e-06	-1.37337e-05	-7.16069e-06	-4.74601e-06	-1.09413e-05	-1.24127e-05	-1.11786e-05	-1.28968e-05	-1.42191e-05	-5.13305e-06	-1.00861e-05	-1.09753e-05	-1.55359e-05	-1.72268e-05	-7.40028e-06	-1.33862e-05	-1.4336e-05	-1.46348e-05	-1.14579e-05	-8.64074e-06	-1.41714e-05	-1.50323e-05	-8.74568e-06	-1.82772e-05	-8.18229e-06	-5.13625e-06	-8.29719e-06	-4.5681e-06	-3.56068e-06	-9.76638e-06	-1.185e-05	-2.1829e-05	-1.2752e-05	-1.13423e-05
-9.36648e-06	-7.8909e-06	-8.45164e-06	7.56517e-06	-5.71456e-06	-8.68344e-06	7.07393e-06	5.37511e-06	4.82548e-09	1.11334e-06	-6.87725e-06	9.83745e-06	1.83966e-06	-6.93884e-06	-3.27395e-06	2.67128e-06	-1.20387e-06	-1.48449e-05	-1.0698e-05	-1.86779e-05	-2.01168e-05	-2.47613e-05	-1.71465e-05	-2.61416e-05	-1.42435e-05	-1.5124e-05	-2.24988e-05	-2.03866e-05	-2.28541e-05	-1.54291e-05	-2.23451e-05	-1.85004e-05	-2.2764e-05	-2.94757e-05	-1.88682e-05	-2.2127e-05	-2.81627e-05	-2.16008e-05	-1.5931e-05	-2.57403e-05	-2.39661e-05	-3.06731e-05	-2.51476e-05	-1.60864e-05	-2.30581e-05	-2.16457e-05	-2.52459e-05	-3.16688e-05	-2.60449e-05	-2.54949e-05
9.80777e-07	-7.84947e-06	-1.60853e-06	5.53229e-06	2.05065e-06	9.53676e-06	9.54012e-06	3.79941e-06	-4.73987e-06	-6.58015e-06	7.51329e-06	5.87556e-06	1.25288e-06	-2.1397e-06	-7.76184e-06	-6.07098e-06	-1.86093e-05	-6.49989e-06	-1.61976e-05	-2.76243e-05	-2.29016e-05	-2.93922e-05	-2.75246e-05	-3.20271e-05	-2.5907e-05	-2.67204e-05	-2.50953e-05	-3.10237e-05	-2.67256e-05	-2.19798e-05	-2.98975e-05	-2.84191e-05	-3.79612e-05	-4.01484e-05	-2.93207e-05	-3.12647e-05	-3.6386e-05	-2.84806e-05	-3.77912e-05	-4.18988e-05	-3.6903e-05	-3.2617e-05	-4.79937e-05	-1.53319e-05	-3.01972e-05	-2.79899e-05	-3.50409e-05	-3.0674e-05	-3.14858e-05	-3.63505e-05
-3.7101e-06	-2.10143e-06	1.05013e-05	-5.54013e-06	7.98666e-06	3.79064e-06	-1.60526e-06	-6.38656e-06	-5.22797e-06	1.10923e-05	3.9514e-06	5.61531e-06	-1.11433e-06	-1.11599e-05	-4.84767e-06	-1.18629e-06	-2.86684e-06	-1.13163e-05	-1.67883e-05	-1.9789e-05	-7.74525e-06	-5.33389e-06	-1.08814e-05	-1.78843e-05	-1.75699e-05	-1.26269e-05	-2.87341e-05	-1.64006e-05	-1.2403e-05	-1.90292e-05	-1.53201e-05	-1.77893e-05	-1.28628e-05	-2.10873e-05	-1.63907e-05	-2.5359e-05	-1.88623e-05	-1.68813e-05	-2.52685e-05	-1.65017e-05	-1.9687e-05	-2.14908e-05	-2.31441e-05	-1.81603e-05	-1.89137e-05	-1.65848e-05	-3.10471e-05	-1.36858e-05	-1.65175e-05	-2.764e-05
7.82992e-06	9.36587e-06	5.50796e-06	-9.38156e-07	6.33039e-06	4.11497e-06	1.24347e-06	9.32639e-06	-6.84342e-07	5.06317e-06	3.65986e-06	4.64488e-06	-1.04203e-06	-9.68312e-06	-7.72605e-06	-9.52711e-06	-1.63948e-05	-5.83005e-06	-1.86512e-05	-2.17801e-05	-6.59353e-06	-1.70111e-05	-2.12771e-05	-1.58953e-05	-1.65319e-05	-2.02724e-05	-1.12617e-05	-2.59282e-05	-2.12108e-05	-2.42669e-05	-1.93582e-05	-2.57961e-05	-2.4066e-05	-2.00055e-05	-1.38178e-05	-1.52911e-05	-2.32201e-05	-2.51153e-05	-1.76176e-05	-2.63065e-05	-2.59186e-05	-2.10131e-05	-3.15513e-05	-2.43528e-05	-2.93786e-05	-2.13657e-05	-1.81433e-05	-2.20939e-05	-1.59645e-05	-2.11282e-05
-1.24274e-06	5.39228e-06	4.40086e-06	7.43605e-06	5.46305e-06	4.14433e-06	1.19057e-07	4.59582e-06	3.42347e-06	-1.7958e-06	1.29436e-06	1.06628e-06	4.54491e-07	-9.0418e-08	-9.23231e-06	-1.61903e-05	-1.60446e-05	-6.02659e-06	-9.86593e-06	-1.51934e-05	-2.04858e-05	-6.50007e-06	-4.85654e-06	-1.60479e-05	-1.38796e-05	-1.91153e-05	-1.83458e-05	-1.08766e-05	-1.67065e-05	-1.30043e-05	-8.59865e-06	-1.72898e-05	-1.68777e-05	-1.36844e-05	-1.44626e-05	-5.40276e-06	-1.83786e-05	-1.42813e-05	-1.42195e-05	-1.21513e-05	-1.78385e-05	-1.17143e-05	-2.01643e-05	-2.1345e-05	-8.08029e-06	-9.76949e-06	-6.79642e-06	-6.60544e-06	-9.05176e-06	-8.82721e-06
-6.0947e-06	-4.04334e-07	1.49119e-06	4.52277e-06	-1.0028e-06	3.62462e-06	-2.16194e-06	4.64313e-06	-3.24796e-07	-3.48768e-06	-1.37913e-06	3.99783e-06	-1.27846e-05	-1.48876e-06	-1.52421e-05	-1.55538e-05	-1.40305e-05	-3.51803e-06	-1.01145e-05	-5.84201e-06	-1.16179e-05	-8.98777e-06	8.3347e-07	-1.76124e-05	-2.02938e-05	-1.34103e-05	-1.41738e-05	-1.4794e-05	-2.17678e-05	-1.47647e-05	-1.20798e-05	-8.82453e-06	-7.88219e-06	-1.03226e-05	-1.91117e-05	-3.30184e-06	-2.1989e-05	-1.83867e-05	-1.59851e-05	-9.56942e-06	-1.87493e-05	-1.80723e-05	-1.27968e-05	-2.02425e-05	-1.37696e-05	-2.28091e-05	-1.48094e-05	-1.7312e-05	-1.21637e-05	-2.33261e-05
-5.59136e-06	-6.513e-06	-3.09244e-06	-7.044e-08	-6.31648e-06	-2.6408e-06	2.4114e-06	5.65473e-06	2.54502e-06	1.12e-07	-6.18875e-06	-4.66751e-06	-4.00378e-06	-8.20622e-06	1.97965e-07	-1.16367e-05	-6.76415e-06	-1.28177e-05	-9.08385e-06	-1.41845e-05	-1.35583e-05	-1.56214e-05	-1.44388e-05	-1.26687e-05	-1.33454e-05	-1.51126e-06	-3.12092e-06	-1.88095e-05	-1.4925e-05	-1.46461e-05	-1.80942e-05	-1.4602e-05	-6.96978e-06	-1.11831e-05	-1.38205e-05	-2.20007e-05	-7.52511e-06	-1.91413e-05	-2.1872e-05	-1.3075e-05	-1.33807e-05	-1.49645e-05	-1.06867e-05	-2.06474e-05	-9.75485e-06	-2.42331e-05	-2.16512e-05	-2.25536e-05	-1.47308e-05	-1.93638e-05
-6.0413e-06	-2.37248e-06	-1.57702e-06	-4.83888e-06	-7.74859e-06	1.47247e-06	2.16676e-06	8.21426e-06	-5.62275e-07	-3.19735e-06	-8.61023e-07	-3.39889e-07	-8.00085e-06	-6.48484e-06	-4.7017e-06	-1.25746e-05	-1.4435e-05	-8.91866e-06	-1.45269e-05	-1.30221e-05	-2.03446e-05	-1.22575e-05	-9.42148e-06	-1.224e-05	-1.08289e-05	-5.04514e-06	-2.03286e-05	-1.77544e-05	-1.75595e-05	-1.52808e-05	-3.3498e-05	-1.29868e-05	-1.07865e-05	-6.86321e-06	-2.24489e-05	-1.91037e-05	-1.65386e-05	-2.27116e-05	-1.78669e-05	-2.20539e-05	-2.13063e-05	-1.97409e-05	-1.40976e-05	-2.09413e-05	-9.5154e-06	-1.72962e-05	-1.37197e-05	-2.06159e-05	-1.69435e-05	-2.35487e-05
-8.74346e-06	-1.16958e-05	5.76995e-06	-5.31973e-06	3.65551e-06	7.54119e-06	-2.32887e-06	4.17324e-06	-5.94393e-06	-6.28334e-06	9.95104e-07	-6.22204e-06	-2.20022e-06	-1.18281e-05	-5.95315e-06	-8.47704e-06	-1.13106e-05	-1.1527e-05	-1.57433e-05	-1.30808e-05	-1.54549e-05	-1.62636e-05	-1.14462e-05	-1.09364e-05	-2.23003e-05	-1.28448e-05	-2.46557e-05	-1.85092e-05	-1.17817e-05	-1.50489e-05	-2.16646e-05	-1.75488e-05	-1.77645e-05	-1.80456e-05	-1.89579e-05	-1.91211e-05	-2.54696e-05	-2.41766e-05	-1.75676e-05	-1.96923e-05	-1.94669e-05	-2.59043e-05	-7.48838e-06	-1.10483e-05	-1.25186e-05	-1.71554e-05	-2.00375e-05	-2.51005e-05	-1.86389e-05	-1.33732e-05
2.94341e-06	-7.57451e-06	-2.63006e-06	3.15091e-06	6.94699e-06	-1.37992e-06	-2.35287e-06	-3.54696e-06	-7.36401e-06	1.10224e-06	2.14034e-06	-6.98596e-06	-2.43165e-06	-7.20023e-06	-5.83136e-06	-1.65393e-05	-1.0348e-05	-8.8113e-06	-1.85581e-06	-1.32659e-05	-1.40939e-05	-1.30997e-05	-1.09622e-05	-9.40169e-06	-1.40409e-05	-2.01717e-05	-1.03494e-05	-1.1869e-05	-2.15212e-05	-1.70809e-05	-1.31847e-05	-2.25124e-05	-1.3082e-05	-1.7387e-05	-1.47385e-05	-1.62121e-05	-2.31425e-05	-6.07576e-06	-2.09301e-05	-1.97825e-05	-1.87776e-05	-1.65704e-05	-5.59589e-06	-1.49178e-05	-2.19208e-05	-1.08704e-05	-1.24095e-05	-2.59197e-05	-1.58669e-05	-1.4274e-05
-2.64123e-07	-9.99264e-06	5.86364e-06	-7.37906e-06	-3.55288e-06	7.12389e-06	-6.36923e-06	6.40381e-06	-3.77206e-06	-1.83528e-07	-3.72025e-08	-8.77477e-06	-6.77745e-07	1.88328e-07	-1.1705e-05	-6.5163e-06	-1.08861e-05	-1.35375e-05	-1.08105e-05	-5.58596e-06	-1.21765e-05	-5.27335e-06	-2.0961e-05	-6.09097e-06	-1.09674e-05	-4.99217e-06	-1.28782e-05	-1.14994e-05	-1.86167e-05	-1.52119e-05	-1.0922e-05	-1.17134e-05	-4.99473e-06	-1.39712e-05	-9.36334e-06	-1.78673e-05	-9.40683e-06	-3.24534e-06	-5.786e-06	-9.22669e-06	-1.24079e-05	-4.36007e-06	-7.76446e-06	-2.65959e-06	-2.27784e-05	-7.25824e-06	-6.07626e-06	-1.18779e-05	-1.49183e-05	-6.93476e-06
-1.44721e-05	-7.28029e-06	3.37899e-07	6.12155e-06	-6.96262e-06	1.30663e-06	8.75562e-06	-8.75674e-07	7.67943e-06	-1.05163e-06	-4.21327e-07	5.51437e-06	-9.47237e-06	-7.96605e-06	-8.99945e-06	-1.80331e-05	-3.97559e-06	-7.59815e-06	-1.13614e-05	-8.72294e-06	-6.84731e-06	-1.34944e-05	-1.21596e-05	-1.40219e-05	-2.37312e-05	-9.42911e-06	-5.74746e-06	-1.12852e-05	-8.83388e-06	-5.53805e-06	-9.55465e-06	-1.49225e-05	-1.01277e-05	-1.71588e-05	-1.15999e-05	-1.11055e-05	-1.49158e-06	-4.35941e-06	-1.3767e-05	-1.33211e-05	-1.97679e-05	-1.15596e-05	-1.28603e-05	-3.54076e-07	-9.10306e-06	-7.13308e-06	-1.3214e-05	-1.04254e-05	-1.00273e-05	-5.61317e-06
-2.10628e-05	-7.37483e-06	4.92354e-06	1.28513e-06	6.41873e-06	6.53776e-06	-7.22297e-06	-7.85898e-06	7.93988e-06	6.01262e-07	-8.65017e-07	-1.16959e-06	8.90585e-06	-5.59844e-06	-1.52558e-05	-9.9804e-06	-8.97116e-07	-5.76383e-06	3.99191e-07	-4.04893e-06	-1.18564e-05	-1.54574e-05	-1.85969e-06	-1.83933e-05	-7.56239e-06	-6.10535e-06	-1.17259e-05	-1.04368e-05	-2.8559e-06	-1.13482e-05	4.56329e-06	-6.82271e-06	-7.00104e-06	-4.96842e-06	3.73344e-06	-1.18175e-05	6.5228e-06	-6.56665e-07	-2.38156e-06	4.16561e-06	-2.53186e-06	-6.91966e-06	-2.75962e-06	-9.33375e-06	-6.63016e-06	3.27723e-06	3.81683e-06	-1.21315e-05	-3.88909e-06	1.00237e-05
1.27727e-06	-4.43034e-06	8.1886e-06	5.84786e-06	-2.91711e-06	1.14281e-05	-5.77573e-06	-4.16255e-06	6.53986e-06	2.703e-06	-6.70877e-06	1.80081e-07	1.88809e-06	-1.00095e-05	-2.26847e-06	-5.14926e-06	-4.59003e-06	-5.95446e-07	-1.12091e-05	-9.29599e-06	-1.44039e-05	-2.06566e-05	-1.58914e-05	-2.50217e-05	-1.27733e-05	-1.57577e-05	-1.33704e-05	-1.93219e-05	-1.96793e-05	-1.71087e-05	-3.3113e-05	-1.15584e-05	-2.06544e-05	-1.62482e-05	-2.02655e-05	-2.4456e-05	-2.19504e-05	-2.27017e-05	-2.61723e-05	-2.20876e-05	-2.90437e-05	-1.31524e-05	-1.89149e-05	-2.70624e-05	-2.70778e-05	-2.00049e-05	-2.10515e-05	-2.37333e-05	-1.03452e-05	-1.67554e-05
-2.61689e-06	9.16738e-06	9.31079e-06	1.43982e-05	-3.85504e-06	1.50045e-05	-2.18128e-06	1.75582e-07	-6.92679e-08	3.28666e-06	-5.03549e-06	-3.08861e-06	3.72385e-06	-3.15004e-06	-6.4666e-07	-5.31646e-06	-1.11879e-05	-9.11993e-06	-1.00953e-05	-1.00632e-05	-5.06196e-06	-7.56165e-06	-7.64013e-06	-1.75764e-05	-1.04029e-05	-2.31591e-05	-1.26146e-05	-1.4242e-05	-1.25346e-05	-1.00493e-05	-1.34806e-05	-6.68459e-06	-1.61035e-05	-7.03295e-06	-8.34933e-06	-9.33995e-06	-1.01174e-05	-1.64735e-05	-5.81285e-07	-1.89457e-05	-2.42553e-05	-7.97706e-06	-2.2946e-05	-5.95276e-06	-1.50865e-05	-1.72879e-05	-9.06156e-06	-9.77438e-06	-4.80336e-06	-1.72459e-05
-5.00168e-07	-1.46184e-05	-2.52307e-07	1.32337e-05	-3.8589e-06	-1.17182e-06	2.57158e-06	9.03081e-07	2.91433e-06	1.97664e-07	1.48906e-06	-3.43496e-06	-3.75326e-07	4.02683e-06	-1.38338e-06	-6.34264e-06	-7.19291e-06	-4.04598e-06	2.27959e-07	-3.8628e-06	9.54912e-06	1.87734e-06	5.47041e-06	4.21547e-06	1.10364e-06	-5.44532e-06	-5.67288e-06	4.67947e-06	-2.36393e-06	6.93234e-06	1.48444e-06	-1.20605e-06	2.34458e-06	-7.26804e-07	2.60748e-06	7.13155e-06	3.86089e-06	-5.27861e-07	9.04773e-06	1.03414e-05	-1.13544e-05	1.38032e-06	-6.10099e-06	-3.43445e-06	-2.8299e-06	5.67919e-06	-8.65811e-06	4.79317e-06	2.34243e-06	-1.67638e-05
-1.13249e-05	-5.41721e-08	2.00245e-06	2.91149e-06	-1.09446e-06	4.03479e-07	2.86447e-06	1.62303e-06	2.23039e-06	5.5964e-06	-4.89157e-06	-3.97874e-06	1.41095e-06	-1.40748e-06	-5.04324e-06	1.95264e-06	-1.98176e-06	-1.62026e-06	-6.80547e-06	-1.81659e-06	-5.50224e-06	4.55022e-06	-5.8265e-06	-3.79355e-06	1.91056e-06	-5.73306e-06	-4.15353e-06	-7.68486e-06	1.07767e-06	-9.08095e-06	-7.71105e-06	-8.30984e-07	-4.8749e-06	-1.11371e-05	-7.52422e-06	-5.12346e-06	-9.39064e-06	-1.35238e-05	-1.35746e-05	-4.76774e-06	-8.71957e-06	-1.14417e-06	-2.21935e-05	-1.19338e-05	-1.21109e-05	-7.45903e-06	-1.25586e-05	-3.27166e-06	-1.47526e-05	-6.96009e-06
9.94417e-06	-4.11051e-07	2.58653e-06	5.15271e-06	-1.10229e-05	3.73115e-06	-6.18118e-06	8.6991e-06	8.89992e-06	5.79621e-06	-2.8337e-06	-7.91181e-06	-6.01681e-07	-5.42736e-06	2.61178e-06	-9.02723e-06	-1.21306e-05	1.65856e-06	1.04442e-06	-6.29679e-06	1.88116e-06	6.64048e-06	-4.43304e-06	-5.52821e-06	-7.08463e-06	1.72212e-06	-1.2799e-06	-1.15486e-06	-6.01415e-06	4.34118e-06	-1.53285e-07	2.95077e-06	9.87295e-06	-5.21472e-06	-6.02562e-06	8.483e-06	3.87691e-06	3.47032e-06	-1.72575e-06	4.12631e-06	1.00847e-05	-7.19949e-06	-4.4767e-07	-2.04024e-06	2.62385e-06	-2.38808e-06	7.04181e-07	-2.50604e-06	1.24663e-06	6.47414e-07
1.42828e-06	-2.27063e-06	3.6311e-06	2.46481e-06	-4.18731e-06	6.38095e-07	-8.33064e-06	-2.90272e-06	1.44988e-06	6.46385e-06	-5.9253e-06	-3.62209e-06	4.71657e-07	-3.42263e-06	2.50965e-06	-1.02676e-05	1.82519e-06	-2.33875e-06	-2.01411e-06	-5.41745e-06	-1.73802e-06	-2.49314e-06	-1.89177e-06	-4.17809e-07	-3.12806e-06	-6.12036e-06	-9.44444e-07	1.89096e-06	5.06727e-07	-3.99495e-06	3.73137e-06	1.09418e-07	9.79088e-06	3.01812e-06	3.56656e-06	3.19209e-06	2.70348e-06	1.22392e-06	-4.90589e-06	2.63889e-06	-1.13838e-06	-9.59337e-07	1.22012e-05	-8.8038e-07	2.6389e-06	5.24146e-06	-2.45523e-06	1.19374e-05	-1.31059e-06	5.94771e-06
4.89981e-06	-1.34061e-06	-3.08279e-06	-1.17237e-05	4.24934e-06	4.88572e-06	-7.61978e-08	4.56501e-06	7.41362e-06	4.90188e-07	-5.59969e-06	-9.89544e-06	-4.76827e-06	-3.50955e-08	-9.90958e-07	-5.35181e-06	-1.4163e-06	-6.04474e-06	2.58855e-06	-1.27886e-07	-2.12402e-06	-2.06408e-06	1.0151e-06	-3.08776e-06	-8.85857e-06	-4.58022e-06	-4.57667e-06	7.28622e-07	1.68691e-06	-6.54217e-06	-5.24619e-06	-1.08669e-06	-4.68196e-07	-1.01548e-05	-4.26433e-06	1.58894e-06	-7.32152e-07	-9.57318e-07	-2.53018e-06	-1.57728e-06	-8.18587e-06	4.65751e-06	2.55806e-06	-4.82773e-07	-1.22916e-05	2.18023e-07	-2.81812e-06	-5.68276e-07	4.49893e-06	-3.04605e-06
7.6002e-06	-8.64548e-06	-1.11137e-05	-1.35901e-06	9.66949e-06	1.00838e-05	4.08947e-06	-6.10297e-06	6.91099e-07	-7.20468e-06	1.11023e-07	-1.58709e-06	-2.22334e-06	1.45753e-06	-4.17098e-06	3.9135e-06	-4.84887e-06	-2.91277e-06	1.25626e-06	1.10438e-05	8.41206e-06	7.62821e-06	1.58859e-05	8.68757e-06	1.5086e-05	1.67745e-05	1.26252e-05	1.60805e-05	1.4105e-05	1.88076e-05	1.08938e-05	1.85393e-05	1.30841e-05	2.02784e-05	8.96789e-06	2.64535e-05	7.00815e-06	9.31722e-06	3.39692e-06	1.98943e-05	6.90426e-06	1.01829e-05	2.67009e-05	9.89333e-06	1.34986e-05	6.65286e-06	1.61167e-05	2.51504e-05	1.72805e-05	8.06459e-06
-1.03705e-05	-1.15603e-07	1.97215e-06	1.21443e-06	-8.74907e-07	4.48954e-06	5.32932e-06	-2.11504e-06	-2.20551e-06	-1.93378e-06	1.11429e-06	7.0917e-06	-4.2786e-06	-3.52186e-06	6.64115e-07	-4.76599e-06	6.1059e-07	-2.37763e-06	1.14856e-06	3.7934e-06	7.67045e-06	4.66988e-06	6.01728e-06	4.26865e-06	4.62854e-06	5.60809e-06	-2.69992e-06	8.35084e-06	7.14168e-06	8.22646e-06	3.3673e-06	-1.46406e-06	7.43202e-06	1.25562e-05	9.84395e-06	5.04177e-06	1.26111e-05	8.0513e-06	6.31679e-06	7.07774e-06	3.47714e-06	6.96401e-06	7.79172e-06	1.18538e-05	1.83418e-05	2.83717e-06	2.40947e-06	1.65645e-05	7.62441e-06	1.08258e-05
1.08037e-05	-1.85001e-06	-3.70569e-06	5.48741e-06	-1.97801e-06	6.94125e-07	-1.82358e-06	6.69368e-06	1.09317e-05	-9.47714e-07	5.63542e-06	-6.78591e-06	-3.67982e-08	1.85179e-06	-1.53004e-07	4.25188e-07	-3.52936e-06	-2.81431e-06	-5.46483e-06	-4.30244e-06	-2.69753e-06	-6.55321e-06	-7.95336e-06	-5.01561e-07	-8.15933e-06	-1.45509e-06	-9.80036e-06	-2.10951e-06	-1.14525e-05	-1.6338e-05	-4.56781e-06	-6.77977e-06	-6.94157e-06	-1.09616e-05	-2.40726e-06	-6.8114e-06	-6.45438e-06	-7.25625e-06	-5.31656e-06	-4.43983e-06	-3.10147e-06	7.33649e-06	-5.22538e-06	-1.13968e-05	-7.28161e-07	-1.85815e-05	-5.70686e-06	-1.17654e-05	-9.18443e-06	-7.58878e-06
2.1722e-06	-1.25727e-06	-8.40182e-06	6.46125e-06	3.63563e-06	5.01542e-06	2.98562e-06	-2.81406e-07	5.57775e-06	-1.2426e-06	-4.34364e-06	-7.15166e-07	3.89255e-06	-5.3014e-06	5.12414e-06	-1.53753e-06	-1.34343e-06	-4.39759e-06	-2.3311e-06	-2.88716e-06	-8.01318e-06	-1.5038e-06	-1.1936e-05	-6.12247e-06	-3.67289e-06	-5.36472e-06	-1.17693e-05	-6.4372e-06	-2.85259e-06	-1.54431e-05	-1.11548e-05	-1.5457e-05	-2.07368e-05	-8.92987e-06	-3.9067e-06	-5.18191e-06	-4.37345e-06	-1.63662e-05	-1.68414e-05	-8.96356e-06	-4.57916e-06	-1.80186e-05	-7.22695e-06	-1.64923e-05	-1.20669e-05	-9.10184e-06	-9.97987e-06	-1.53371e-05	-4.72049e-06	-1.34376e-05
-7.78602e-06	8.49843e-06	-9.97011e-06	-1.57873e-06	-1.28217e-06	-1.15199e-05	5.8272e-06	1.40883e-06	5.63995e-06	-5.27082e-06	-4.98438e-06	1.8672e-06	-3.30143e-07	1.90293e-07	-1.55761e-07	1.93505e-07	2.99354e-06	4.86353e-06	4.0153e-06	8.29261e-06	8.35532e-06	6.52331e-06	7.14112e-06	2.64074e-06	1.80607e-06	8.14329e-06	7.13308e-06	7.21279e-06	9.59567e-06	3.62546e-06	9.7533e-06	4.0365e-06	9.66365e-06	5.37363e-06	1.10158e-05	6.03677e-06	7.67386e-06	1.48104e-05	8.94835e-06	1.05502e-05	4.43072e-06	1.15159e-05	5.32421e-06	7.20735e-06	1.14911e-05	6.13306e-06	1.5501e-05	8.20428e-06	1.11221e-05	8.32814e-06
-1.0427e-06	-6.1937e-06	-1.79344e-06	-1.96488e-06	5.8053e-06	-2.29383e-07	-5.50497e-07	-2.15667e-06	1.41911e-06	-3.48915e-06	3.6913e-06	4.91299e-06	1.66124e-06	-6.38673e-08	5.08901e-06	8.59218e-08	-9.89136e-08	1.91345e-06	1.70013e-06	7.54324e-06	1.56431e-05	1.37688e-05	7.43725e-06	2.9503e-06	3.27097e-06	1.2967e-05	1.03372e-05	1.03534e-05	1.0059e-05	3.90189e-06	1.0317e-05	8.40425e-07	1.35981e-05	4.11491e-06	-7.29005e-06	9.76112e-06	9.71587e-06	6.42473e-06	1.65911e-06	9.87519e-06	8.24988e-06	6.18725e-06	8.63606e-06	9.23196e-06	4.62502e-06	2.33636e-06	9.87999e-06	-4.10057e-06	5.69441e-06	9.88164e-07
-4.48514e-06	-5.1323e-06	3.6231e-06	4.33974e-08	-2.63054e-06	-4.95051e-06	-5.49083e-06	3.52336e-06	2.96498e-06	-8.61202e-06	4.66865e-06	3.52783e-06	-3.78827e-06	-3.29672e-06	6.3802e-06	3.70129e-06	-2.4549e-06	8.10579e-06	1.09797e-05	1.14866e-05	1.11269e-05	4.52706e-06	1.77062e-05	9.74005e-06	1.49705e-05	7.97612e-06	1.60545e-05	1.79079e-05	1.56932e-05	1.91498e-05	2.21448e-05	2.09564e-05	2.66939e-05	1.19648e-05	1.64935e-05	1.70885e-05	2.057e-05	2.0776e-05	2.18571e-05	1.79192e-05	1.48456e-05	1.42581e-05	1.74657e-05	1.28092e-05	1.52303e-05	3.01684e-05	1.54457e-05	1.32058e-05	5.0231e-06	1.6239e-05
[truncated: 58 more columns]

## Sheet: Fig 3a
-1.91374e-05	2.84115e-05	-6.02644e-06	-2.41186e-05	-1.10653e-05	7.47954e-06	-5.68385e-06	5.26805e-06	-3.61757e-06	4.73029e-06	7.99318e-06	1.58589e-05	-7.10154e-06	2.24884e-06	2.93558e-05	6.26667e-06	1.42654e-05	2.82808e-05	2.09654e-05	2.95253e-05	2.83679e-05	2.48906e-05	4.77503e-05	2.88123e-05	3.29077e-05	3.40407e-05	1.73358e-05	3.52581e-05	4.15875e-05	6.10687e-05	3.73264e-05	4.25989e-05	3.99159e-05	5.79014e-05	2.32047e-05	5.07391e-06	3.82944e-05	3.10289e-05	1.65394e-05	1.37565e-05	4.30275e-05	4.31729e-05	-5.10399e-06	1.88883e-05	3.25309e-05	1.87613e-05	3.66135e-05	1.08666e-05	2.13101e-05	9.49619e-06
-1.05801e-05	1.22123e-05	-4.84923e-06	-3.20687e-05	-8.81628e-06	1.78815e-05	7.96998e-06	1.40524e-05	-1.30244e-06	-1.38251e-05	3.25264e-06	7.29375e-06	1.50783e-06	6.88357e-06	3.09903e-05	-7.25267e-07	1.78026e-05	1.71265e-05	1.89833e-05	1.05675e-05	1.79267e-05	3.16244e-05	2.57343e-05	2.09395e-05	5.20861e-05	3.83558e-05	7.32158e-06	3.70062e-05	2.9164e-05	5.07233e-05	2.64826e-05	4.21016e-05	2.68562e-05	5.69703e-05	3.13512e-05	2.20095e-05	3.72051e-05	1.84607e-05	2.47413e-05	2.58433e-05	3.54104e-05	3.22208e-05	2.91563e-06	9.33451e-06	2.49119e-05	3.61183e-05	3.5437e-05	1.818e-05	1.55788e-05	7.83165e-07
1.65755e-06	4.38612e-06	-6.67083e-06	-1.7358e-05	8.83503e-06	-1.50777e-06	2.16098e-07	2.70948e-06	-1.18467e-05	-1.24994e-05	-4.58289e-06	7.05084e-06	1.04512e-05	9.35095e-06	2.38045e-05	5.3396e-06	5.15059e-06	7.68378e-06	8.67813e-06	2.34316e-05	2.42213e-05	3.38824e-05	2.5346e-05	2.24289e-05	4.90812e-05	2.42935e-05	2.42281e-05	3.23821e-05	2.68918e-05	4.47897e-05	1.74553e-05	2.63527e-05	2.48366e-05	3.10777e-05	2.79039e-05	1.95096e-05	2.92759e-05	2.8039e-05	2.76539e-05	2.01434e-05	6.18206e-06	2.69923e-05	1.58754e-05	7.10729e-06	1.35657e-05	3.68742e-05	1.22985e-05	-1.05987e-05	5.06381e-06	4.63781e-06
2.97447e-06	1.36775e-05	1.7303e-05	7.57081e-06	3.5533e-06	-9.07307e-06	-1.75716e-05	3.24803e-06	1.04458e-05	-5.92089e-06	1.28324e-05	-3.0322e-06	-6.75565e-06	-3.08833e-06	3.52797e-05	8.87798e-06	6.84952e-06	-1.33555e-05	5.29453e-06	2.05275e-05	3.27484e-05	1.53233e-05	2.02587e-05	1.7857e-05	2.35828e-05	1.3534e-05	1.25845e-05	3.31365e-05	4.11198e-05	2.12431e-05	6.36345e-06	7.83136e-06	2.32737e-05	2.19718e-05	1.98001e-05	2.26595e-05	1.95769e-05	1.77893e-05	1.92057e-05	1.39653e-05	-9.58976e-06	2.68143e-05	-7.10539e-06	2.18613e-05	-1.56584e-05	1.59878e-05	1.17934e-06	-1.25191e-05	1.40759e-05	1.45043e-06
1.30768e-05	2.60886e-05	2.29911e-05	4.72841e-06	5.43916e-06	-5.43848e-06	-4.44682e-06	1.27697e-05	2.71804e-05	9.77137e-07	1.04641e-06	3.13898e-06	5.9019e-06	-2.58084e-06	1.25862e-05	5.14395e-06	1.57989e-05	-2.92242e-06	1.84986e-05	1.20986e-05	4.40853e-05	2.74755e-06	8.40039e-06	6.75725e-06	2.05205e-05	1.13013e-06	4.80627e-06	1.20668e-05	-9.6749e-07	6.18714e-06	-5.72851e-06	9.70006e-06	-1.71545e-06	2.15994e-05	1.76321e-05	-4.00907e-07	2.28251e-05	3.49468e-06	1.40818e-06	8.9432e-06	1.15684e-05	9.05332e-06	4.30547e-06	4.4293e-06	-1.72354e-05	2.19895e-05	6.13841e-06	3.33086e-06	9.50436e-06	3.94016e-07
-3.42117e-06	1.47691e-05	-9.02906e-06	9.84651e-06	-4.53147e-07	4.14516e-06	7.29072e-06	2.01052e-05	1.03814e-05	4.32808e-06	-1.13377e-05	1.43138e-05	5.72677e-06	7.63043e-06	1.14338e-05	4.47795e-06	1.78495e-05	1.30747e-05	1.48683e-05	3.17221e-05	2.58e-05	1.16851e-05	2.23079e-06	-3.51716e-06	4.36861e-06	4.35586e-06	-2.08819e-05	4.31676e-06	-1.35868e-05	6.2667e-06	-6.76087e-06	1.07699e-05	-8.01508e-06	2.04773e-06	-6.80164e-07	3.89132e-06	8.96933e-06	-9.50566e-06	-5.8697e-06	1.17906e-05	1.69183e-05	9.21925e-07	1.99002e-05	-4.24981e-06	-5.33994e-06	3.9721e-06	-1.18656e-05	-3.22488e-06	2.20841e-05	-1.21333e-05
-1.39334e-05	7.13674e-06	-2.88963e-06	7.6218e-06	1.11403e-05	7.04404e-06	7.09926e-06	-2.76762e-06	7.38453e-06	1.4259e-05	4.53411e-06	8.4628e-06	-5.55427e-06	7.73743e-06	1.7777e-05	5.79828e-06	9.26367e-06	1.82576e-05	2.00665e-05	2.82795e-05	2.33337e-05	8.66792e-06	1.43931e-05	1.06927e-05	-1.72792e-05	4.72589e-06	-1.86964e-06	1.01494e-05	-6.88559e-06	1.51181e-05	-2.17598e-06	1.77608e-06	1.16474e-05	9.66062e-06	1.06384e-05	-6.47625e-06	-1.00204e-06	-1.83034e-05	-8.77273e-06	1.15084e-06	-1.29945e-05	8.95803e-06	7.52108e-06	-9.37581e-06	9.28704e-06	1.9996e-05	-1.96335e-05	5.70382e-06	8.4297e-06	-1.8439e-05
-1.15527e-07	2.89549e-05	9.7412e-06	6.8923e-06	6.68744e-06	4.03891e-06	8.44868e-06	-8.85269e-06	2.86904e-06	5.02008e-06	-3.4128e-06	-5.13762e-06	-1.21447e-05	1.97422e-05	2.3907e-05	1.73911e-05	2.6445e-06	8.35401e-06	1.26061e-05	2.83182e-05	2.94106e-05	3.42062e-06	1.63353e-05	1.2007e-05	9.86745e-06	5.86633e-06	1.8273e-05	1.12046e-05	-2.16218e-05	9.54434e-06	-1.6968e-05	8.89548e-07	4.3499e-06	-6.50952e-06	2.41042e-06	-1.77803e-05	-5.97179e-06	-1.47706e-05	-2.19892e-05	-4.83778e-06	-1.76744e-05	-9.39253e-06	5.59685e-06	-1.21081e-05	3.06368e-06	-7.17337e-06	-8.71122e-06	-5.20542e-06	1.18514e-05	-1.77327e-05
7.51761e-06	1.64446e-05	3.85988e-06	-1.63842e-05	9.75925e-06	6.5625e-07	-6.8468e-09	-1.48212e-05	-8.55559e-07	1.53792e-05	-2.10046e-05	2.36265e-07	9.13572e-07	1.84779e-05	1.42127e-05	2.17609e-05	7.29868e-06	7.96134e-06	1.18865e-05	1.0755e-05	9.75237e-06	1.26111e-07	1.5642e-05	8.51173e-06	3.97059e-06	1.05114e-05	3.1227e-06	-8.23823e-06	-2.37458e-05	-8.72327e-06	-1.28075e-05	-6.55805e-06	-1.63756e-05	-6.6646e-06	-1.19834e-05	-1.156e-05	-1.09075e-05	-2.14548e-05	-9.05633e-06	-3.40278e-06	-1.04003e-05	-1.76874e-05	-3.26892e-06	-1.49642e-05	2.99231e-06	-1.3904e-05	1.44031e-06	-7.40731e-06	-1.87939e-06	1.06824e-06
1.00375e-05	1.99869e-05	2.37804e-05	-1.27644e-05	1.58443e-05	8.33626e-06	1.45374e-05	-6.00267e-06	8.9994e-07	2.52447e-05	-1.03008e-05	2.24308e-06	7.23882e-07	-3.99654e-06	4.33793e-06	1.18987e-05	1.01878e-05	1.60813e-05	2.01746e-05	-1.32833e-05	-8.51466e-06	-3.56936e-06	4.23696e-06	-1.49474e-06	-1.90416e-05	-1.40257e-05	-4.63024e-06	-1.87437e-05	-2.66898e-05	-5.58439e-06	-2.42017e-05	-1.03627e-05	-2.83285e-05	-5.13622e-06	-2.27621e-05	-2.06697e-05	-1.93132e-05	-1.47821e-05	1.26894e-06	-1.00894e-05	-2.06741e-05	-2.11121e-05	-9.5899e-06	-7.29629e-06	-7.6035e-06	-1.6249e-05	-1.62172e-06	-3.82182e-06	-2.017e-05	-6.22927e-06
-4.33441e-06	2.07318e-05	1.06147e-05	-1.95805e-05	4.60838e-07	9.56348e-06	1.03886e-05	-3.80368e-06	1.73874e-06	1.17055e-06	-1.25827e-05	2.05984e-06	-6.94507e-06	-1.43057e-05	-8.88151e-06	1.10649e-05	1.01495e-05	4.46921e-06	8.92311e-06	-2.34907e-06	-6.72744e-06	-1.04142e-05	4.92588e-06	-1.07224e-05	-1.73282e-05	-2.25828e-05	-2.32698e-06	-1.92837e-05	-9.9208e-06	4.86097e-06	-3.63935e-06	-9.12688e-06	-3.59454e-05	-1.14332e-05	-2.88104e-05	-2.73557e-05	-1.62886e-05	-2.36012e-05	-8.63039e-06	-1.60695e-05	-2.64355e-05	-1.77253e-05	-3.46556e-07	-1.1069e-05	-1.7559e-05	-8.28094e-06	-1.11701e-05	-6.48577e-06	-2.62069e-05	-1.5515e-05
-2.62852e-06	1.02079e-05	-5.91115e-06	-8.88411e-06	1.1661e-05	-3.7743e-06	6.40838e-06	4.38132e-06	3.46343e-06	-2.4804e-06	-1.3933e-05	-1.88323e-06	-2.38144e-06	-1.22742e-05	-1.77859e-05	2.04836e-05	8.45573e-07	-1.03569e-05	-1.1021e-05	-9.68191e-07	-7.74047e-06	-1.22558e-05	1.08421e-06	-1.07674e-05	-9.89867e-06	-1.45051e-05	-1.56917e-06	-2.47271e-05	-6.91391e-06	-2.83148e-05	-9.00449e-06	-1.55731e-05	-4.0035e-05	-2.75392e-05	-2.3071e-05	-1.77736e-05	-1.21813e-05	-3.59927e-05	-2.39375e-05	-2.70006e-05	-1.79732e-05	-7.05405e-06	-7.59607e-06	-1.34992e-05	-1.61667e-05	-7.69904e-06	-1.62644e-05	-1.60774e-05	-1.80492e-05	-2.63907e-05
-4.13047e-06	1.38536e-05	4.16104e-06	-2.70324e-06	1.20459e-05	-9.19874e-06	8.60632e-06	5.54358e-06	5.78085e-06	1.45885e-06	-3.78248e-06	2.37777e-07	-7.69089e-07	-1.1138e-06	-1.7224e-05	9.23057e-06	-6.74156e-06	-4.38994e-06	-1.87171e-05	-1.02748e-05	-5.34773e-06	-1.66445e-05	-1.10812e-05	-7.98984e-06	-1.29383e-05	-3.87816e-06	-4.11035e-06	-2.92289e-05	-1.58622e-05	-3.47911e-05	-2.20782e-05	-1.61227e-05	-2.63051e-05	-2.027e-05	-1.90271e-05	-1.79046e-05	-1.77418e-05	-2.34827e-05	-2.24848e-05	-4.00687e-05	-2.43265e-05	-7.61552e-06	-1.45017e-05	-1.86399e-05	-2.45309e-05	-1.76157e-05	-2.35435e-05	-2.47193e-05	-2.20865e-05	-1.39134e-05
-1.12219e-05	1.40733e-05	1.1496e-05	9.70238e-06	5.5469e-06	-1.98979e-08	1.07298e-05	-5.52758e-06	1.2878e-05	-5.43604e-06	2.92488e-06	-7.06319e-06	-8.5539e-06	1.20475e-05	-8.84423e-06	3.54568e-06	-4.21899e-07	4.05557e-06	-1.74649e-05	-1.18767e-05	4.42426e-07	-2.84832e-05	-1.7245e-05	-7.42332e-06	-1.71549e-05	-2.02549e-05	-2.76526e-05	-2.92032e-05	-2.19023e-05	-2.57745e-05	-2.18626e-05	-1.9619e-05	-2.52721e-05	-2.31673e-05	-1.09481e-05	-3.26998e-05	-2.73303e-05	-2.76721e-05	-3.38084e-05	-2.479e-05	-2.39207e-05	-2.0763e-05	-1.34823e-05	-1.87591e-05	-2.33261e-05	-2.84203e-05	-1.80898e-05	-1.83318e-05	-1.23027e-05	-1.1559e-05
-1.2077e-05	7.32906e-07	5.19207e-06	6.97143e-06	-7.64924e-06	-6.85349e-06	8.84038e-06	-1.22308e-05	1.40318e-06	5.89393e-06	6.60205e-07	-1.15953e-05	-7.9306e-06	7.57321e-06	5.4712e-07	8.8421e-06	-8.22367e-06	7.14402e-07	-3.82747e-06	-1.55992e-05	1.29484e-06	-6.5778e-06	-1.85558e-05	-2.26442e-05	-3.12594e-05	-1.33302e-05	-3.23351e-05	-3.13958e-05	-2.17418e-05	-2.00633e-05	-2.99724e-05	-1.92429e-05	-3.49066e-05	-4.84438e-05	-2.03445e-05	-2.15081e-05	-1.55673e-05	-2.95403e-05	-2.84522e-05	-1.97806e-05	-2.05285e-05	-2.38739e-05	-1.78456e-05	-2.80332e-05	-2.41547e-05	-2.93825e-05	-1.53436e-05	-2.05223e-05	-1.10057e-05	-1.67596e-05
-9.79923e-06	5.0017e-06	1.01516e-05	-5.95288e-06	3.73564e-06	-1.60224e-05	-1.49948e-07	3.2692e-06	-1.66107e-06	1.17802e-05	-1.01881e-06	-1.07648e-05	-1.07377e-05	3.75714e-07	-2.56632e-06	-3.29872e-06	-1.63334e-05	-1.37349e-05	-1.67506e-07	-2.51709e-05	-6.59685e-06	-1.48504e-05	-1.93359e-05	-2.12448e-05	-3.14602e-05	-1.54916e-05	-2.44968e-05	-2.96964e-05	-2.42335e-05	-2.88721e-05	-3.3114e-05	-2.48681e-05	-3.20934e-05	-3.94031e-05	-3.36082e-05	-1.80938e-05	-2.74304e-05	-9.33874e-06	-8.3578e-06	-1.50401e-05	-2.46386e-05	-1.99482e-05	-2.02296e-05	-2.78252e-05	-1.97296e-05	-2.52979e-05	-2.18827e-05	-2.49637e-05	-2.32216e-05	-1.2756e-05
1.55175e-06	8.49637e-06	1.62027e-05	-2.87953e-06	5.41614e-06	-4.21654e-06	-4.29575e-06	9.62007e-07	6.32045e-06	1.52809e-05	5.48392e-06	1.11394e-05	-6.42341e-06	-3.666e-06	2.84967e-06	1.61106e-06	-1.24227e-05	-1.64742e-05	-7.4518e-06	-2.02165e-05	-5.46059e-06	-2.65689e-05	-1.89061e-05	-2.87137e-05	-2.62579e-05	-2.95012e-05	-3.65729e-05	-2.05884e-05	-2.90605e-05	-1.81554e-05	-3.4622e-05	-3.20759e-05	-2.32592e-05	-3.18707e-05	-3.9285e-05	-2.64872e-05	-4.21907e-05	-1.0476e-05	-1.32601e-05	-2.23214e-05	-1.89525e-05	-1.82572e-05	-3.10134e-05	-1.49328e-05	-2.40482e-05	-3.33311e-05	-1.77672e-05	-2.82093e-05	-2.56158e-05	-2.11367e-05
-6.6488e-06	-7.86785e-06	1.45444e-05	2.39305e-06	-9.76184e-07	-4.2325e-06	-1.03553e-05	1.93044e-06	7.91754e-06	2.60485e-06	5.15084e-06	5.12653e-06	-2.0875e-06	-5.39562e-06	-1.30495e-06	-1.03508e-05	-1.27224e-05	-1.8106e-05	-1.03552e-05	-2.31403e-06	-9.60944e-06	-2.83972e-05	-4.12329e-05	-2.66618e-05	-2.43005e-05	-3.16941e-05	-2.93016e-05	-2.74899e-05	-2.48683e-05	-2.43897e-05	-3.6145e-05	-2.7553e-05	-2.73855e-05	-4.72741e-05	-2.28802e-05	-1.70742e-05	-3.17011e-05	-2.10319e-05	-1.9731e-05	-4.52223e-05	-2.96585e-05	-2.43079e-05	-2.5435e-05	-1.16738e-05	-7.24933e-06	-3.70354e-05	-2.78703e-05	-2.1989e-05	-2.99636e-05	-2.02791e-05
-5.0441e-06	-9.99386e-07	9.56505e-06	-5.44069e-06	3.56933e-06	-9.8866e-06	-1.12914e-05	3.93291e-07	4.93896e-06	-6.03988e-06	-1.76078e-06	-2.61204e-06	1.12723e-05	-4.10144e-06	1.48658e-06	-7.32224e-06	-1.0775e-05	-1.66079e-05	-1.29049e-05	-1.46079e-05	-1.19816e-05	-3.46432e-05	-3.95556e-05	-2.37276e-05	-2.83203e-05	-2.24963e-05	-3.75018e-05	-1.53881e-05	-2.18287e-05	-3.48333e-05	-3.41475e-05	-2.64283e-05	-4.24084e-05	-4.49747e-05	-2.23374e-05	-3.89956e-05	-2.67348e-05	-3.44082e-05	-1.70965e-05	-4.00873e-05	-3.48159e-05	-2.41304e-05	-2.70882e-05	-1.88265e-05	-4.56072e-06	-1.74632e-05	-2.83025e-05	-2.11668e-05	-3.18678e-05	-1.42616e-05
-2.53258e-06	1.05809e-06	-1.24991e-05	-7.94054e-06	6.00322e-06	-1.14177e-05	-1.27497e-05	-1.36022e-06	-5.40254e-06	3.78604e-06	2.73733e-06	-6.34033e-06	-4.74122e-06	-1.21537e-05	-1.67205e-06	-1.44228e-05	-1.70526e-05	-1.52582e-05	-1.50578e-05	-2.05562e-05	-2.20329e-05	-2.78228e-05	-4.21103e-05	-1.72737e-05	-3.27662e-05	-2.87251e-05	-4.33219e-05	-1.89092e-05	-3.98295e-05	-2.79307e-05	-3.51906e-05	-4.21632e-05	-3.10906e-05	-4.11772e-05	-3.03765e-05	-3.40688e-05	-2.57663e-05	-2.90391e-05	-2.46643e-05	-2.47201e-05	-3.39315e-05	-1.99311e-05	-1.56398e-05	-2.3417e-05	-1.19577e-05	-1.05155e-05	-1.34518e-05	-2.17961e-05	-2.33359e-05	-1.56224e-05
-9.11391e-07	4.49551e-06	-5.45856e-07	3.07156e-06	1.56312e-05	6.58721e-06	7.52537e-06	-4.44431e-06	-3.25385e-06	-1.74884e-06	1.57736e-06	5.44199e-07	-1.41846e-06	-7.95872e-06	-7.17112e-06	-4.9919e-06	-2.18372e-05	-1.84247e-05	-1.38147e-05	-2.00981e-05	-2.29929e-05	-3.2597e-05	-4.54528e-05	-2.00031e-05	-2.28043e-05	-2.90431e-05	-3.98164e-05	-3.1155e-05	-3.58536e-05	-2.91433e-05	-2.89908e-05	-3.84849e-05	-2.96124e-05	-2.91532e-05	-4.1999e-05	-2.28546e-05	-2.13148e-05	-1.38033e-05	-3.12116e-05	-2.39771e-05	-3.09277e-05	-2.06384e-05	-1.25086e-05	-2.8183e-05	-1.13675e-05	-1.60707e-05	-2.20596e-05	-1.89951e-05	-2.08111e-05	-2.64832e-06
1.05793e-05	1.54635e-05	2.79512e-06	3.65331e-06	-1.02944e-06	-7.91422e-06	2.50987e-06	2.03083e-06	-5.88075e-07	1.35342e-06	6.70621e-06	-2.77e-06	-5.08327e-06	-2.52436e-06	-2.54092e-06	-1.31625e-05	-1.54612e-05	-1.98343e-05	-1.23898e-05	-1.14148e-05	-2.96639e-05	-2.5492e-05	-4.18455e-05	-2.96182e-05	-2.66758e-05	-2.04927e-05	-3.63096e-05	-2.34769e-05	-3.00587e-05	-3.39517e-05	-3.34976e-05	-2.97302e-05	-3.20122e-05	-2.96003e-05	-3.28959e-05	-2.34364e-05	-2.56964e-05	-2.61734e-05	-2.05457e-05	-2.78201e-05	-2.81581e-05	-2.57214e-05	-2.21952e-05	-2.91828e-05	-5.92666e-06	-2.12085e-05	-1.91985e-05	-1.58613e-05	-2.63429e-05	-5.41046e-06
1.88791e-07	8.78725e-06	4.64104e-06	-3.94144e-06	3.01407e-06	-3.85747e-06	-5.45462e-06	4.5802e-06	1.82263e-06	-1.06165e-05	3.51615e-06	-1.24246e-05	-7.61885e-06	-5.27025e-06	6.21392e-07	-1.32703e-05	-4.77737e-06	-2.26395e-05	-5.5278e-06	-1.67283e-05	-3.05716e-05	-1.73949e-05	-2.24469e-05	-1.8721e-05	-2.31598e-05	-2.1412e-05	-2.2178e-05	-1.62035e-05	-3.40345e-05	-3.43952e-05	-2.66164e-05	-3.16056e-05	-2.28095e-05	-2.597e-05	-3.02862e-05	-3.5543e-05	-2.71723e-05	-4.06673e-05	-1.76477e-05	-2.05302e-05	-3.00491e-05	-2.10303e-05	-3.07001e-05	-1.7402e-05	-1.71425e-05	-2.80896e-05	-1.73537e-05	-1.6849e-05	-1.89283e-05	-1.19835e-05
-8.29918e-06	-9.97468e-06	9.83922e-06	-8.55819e-06	4.73275e-07	-6.2737e-06	1.14744e-05	4.5378e-06	5.39267e-06	-1.2329e-05	-3.59846e-06	-8.73829e-06	5.49703e-06	-8.09754e-06	-8.49366e-06	-9.68638e-06	-3.30532e-06	-1.76663e-05	2.47805e-07	-1.80055e-05	-1.93466e-05	-2.61447e-05	-1.86902e-05	-1.19126e-05	-2.03265e-05	-2.7871e-05	-2.79766e-05	-3.33999e-05	-3.51891e-05	-2.69178e-05	-2.05956e-05	-2.82829e-05	-2.32565e-05	-1.64685e-05	-3.33589e-05	-3.93111e-05	-1.92673e-05	-3.75216e-05	-2.42207e-05	-1.2999e-05	-2.08474e-05	-2.49365e-05	-2.49395e-05	-1.21892e-05	-2.26329e-05	-2.44511e-05	-2.15901e-05	-2.71435e-05	-2.00727e-05	-1.87877e-05
8.32846e-06	-1.48356e-05	6.84692e-06	-1.2843e-05	6.72221e-06	-8.37377e-06	1.95791e-06	1.09275e-06	-1.2583e-06	-7.35657e-06	-9.86984e-06	-8.90699e-06	-4.37339e-06	-1.29397e-05	-1.04871e-05	-1.60051e-05	-8.15504e-06	-1.14121e-05	-3.78169e-06	-1.22657e-05	-1.96473e-05	-3.39585e-05	-2.86753e-05	-1.46862e-05	-2.08646e-05	-2.75818e-05	-2.4802e-05	-4.07627e-05	-3.24447e-05	-1.60292e-05	-2.7422e-05	-3.08519e-05	-2.23256e-05	-2.3184e-05	-3.58564e-05	-3.73154e-05	-3.45047e-05	-4.22235e-05	-3.00319e-05	-1.80812e-05	-5.16572e-06	-2.175e-05	-1.34997e-05	-1.22292e-05	-2.95165e-05	-1.5222e-05	-2.10431e-05	-3.13371e-05	-1.86484e-05	-1.25689e-05
6.20202e-06	-8.00541e-06	7.27664e-06	5.08171e-07	4.11438e-06	-8.38538e-06	-7.21792e-06	1.48526e-06	5.16281e-06	-4.41587e-07	-1.13023e-05	-1.21783e-05	-8.08529e-06	-1.07267e-05	-8.49643e-06	-1.84178e-05	-1.07305e-05	-1.54499e-05	-2.07303e-05	-1.26282e-05	-2.71222e-05	-3.23595e-05	-3.46084e-05	-2.36897e-05	-9.11677e-06	-2.46555e-05	-1.88919e-05	-3.1889e-05	-2.86106e-05	-2.38911e-05	-2.09151e-05	-3.49024e-05	-1.42456e-05	-2.43138e-05	-3.53492e-05	-3.63141e-05	-3.15353e-05	-4.33043e-05	-2.46489e-05	-2.25281e-05	-3.3448e-06	-6.14018e-06	-1.18489e-05	-1.88577e-05	-2.42309e-05	-2.17053e-05	-2.53724e-05	-2.51712e-05	-2.22435e-06	-6.7325e-06
3.36797e-06	-9.68789e-06	5.47515e-06	1.12028e-05	-3.66683e-06	-5.90425e-06	-6.41502e-06	5.61165e-06	5.62178e-06	6.68046e-06	-6.1483e-06	-9.70725e-06	-5.70435e-06	-7.21229e-06	-6.02469e-06	-8.25335e-06	-1.30061e-05	-1.58673e-05	-1.59204e-05	-2.16047e-05	-1.54272e-05	-3.17137e-05	-2.07052e-05	-2.27049e-05	-2.1131e-05	-2.38723e-05	-1.52705e-05	-1.71658e-05	-2.54832e-05	-1.99359e-05	-1.0072e-05	-1.9025e-05	-1.13938e-05	-2.14758e-05	-1.18765e-05	-2.70268e-05	-1.84861e-05	-2.01362e-05	-1.81124e-05	-1.52958e-05	-7.63943e-06	-4.82403e-06	-7.29657e-06	-2.72858e-05	-1.80407e-05	-1.42942e-05	-2.26119e-05	-2.13678e-05	-2.08868e-06	-3.53752e-06
1.25784e-05	-3.63002e-06	-4.56216e-06	1.28086e-05	-1.09858e-05	1.76165e-06	-5.48846e-06	2.33571e-06	5.43809e-06	4.85481e-06	5.11449e-06	-3.12405e-06	-8.81245e-06	-4.3246e-06	-1.58135e-05	-1.03208e-05	-1.31111e-05	-2.01032e-05	-7.72631e-06	-2.74881e-05	-1.91637e-05	-2.29678e-05	-1.98267e-05	-2.79969e-05	-2.43179e-05	-2.29712e-05	-1.4053e-05	-1.50498e-05	-1.54301e-05	-1.90454e-05	-1.31092e-05	-1.33252e-05	-2.44769e-05	-1.87295e-05	-7.11621e-06	-2.41758e-05	-2.67158e-05	-1.85009e-05	-1.66259e-05	-5.66888e-06	-2.26601e-05	-7.91545e-06	-1.82348e-05	-8.27614e-06	-6.92646e-06	-9.75633e-06	-2.26778e-05	-1.53449e-05	-9.24481e-06	-6.62062e-06
1.41959e-06	2.31745e-06	-3.49238e-06	6.2686e-06	-7.39485e-07	-3.09558e-06	-2.24511e-06	-5.19691e-06	-2.54723e-06	2.83169e-06	1.73741e-05	2.15863e-06	-3.06679e-06	-2.50457e-06	-1.78241e-05	-1.76334e-05	-1.29236e-05	-2.55619e-05	-8.95224e-06	-2.26165e-05	-2.9362e-05	-1.47549e-05	-2.27831e-05	-2.1973e-05	-1.80976e-05	-2.34741e-05	-1.06015e-05	-1.21247e-05	-1.2858e-05	-1.9627e-05	-1.17365e-05	-1.37878e-05	-2.10312e-05	-1.50438e-05	-1.47453e-05	-1.04351e-05	-1.70723e-05	-1.45634e-05	-1.12368e-05	-1.61102e-05	-2.38177e-05	-8.7694e-06	-1.28181e-05	-5.2782e-06	-1.63488e-05	-7.96161e-06	-1.90464e-05	-2.38314e-05	-1.98367e-05	-3.28759e-06
6.1454e-06	4.35994e-06	-1.39588e-06	8.79457e-06	7.54723e-06	-1.19061e-05	-1.24295e-06	9.69416e-06	2.99009e-06	-7.653e-06	1.20075e-05	-5.85492e-06	-3.18664e-06	-3.57911e-06	-1.54254e-05	-1.31706e-05	-7.8233e-06	-2.13388e-05	-1.18071e-05	-2.08386e-05	-2.55466e-05	-8.66978e-06	-1.44164e-05	-1.95961e-05	-2.0986e-05	-2.68157e-05	-1.30393e-05	-1.04291e-05	-1.55578e-05	-2.28615e-05	-2.16829e-05	-1.23405e-05	-1.44861e-05	-1.60929e-05	-1.38895e-05	-1.5635e-05	-8.54073e-06	-2.27787e-07	-3.66953e-06	-1.03085e-05	-1.3206e-05	-3.12126e-06	-6.28854e-06	-1.30306e-05	-1.25058e-05	-1.02085e-05	-8.30601e-06	-1.48035e-05	-1.18836e-05	4.35778e-06
-1.2286e-06	6.44062e-06	1.07345e-05	-6.07803e-06	2.45996e-06	1.24631e-06	-9.38412e-06	-2.50631e-06	1.427e-05	-8.09374e-06	7.60659e-06	1.58917e-06	-2.29187e-06	-5.87396e-06	-1.61308e-05	-1.04641e-05	-9.92203e-06	-1.92868e-05	-1.18535e-05	-1.78448e-05	-1.84773e-05	-1.22222e-05	-1.30237e-05	-2.03705e-05	-1.92243e-05	-2.23331e-05	-2.13745e-05	-4.02493e-06	-1.59486e-05	-1.78135e-05	-2.23179e-05	-1.07701e-05	-1.58088e-05	-2.16465e-05	-1.90754e-05	-1.3317e-05	2.6405e-06	-1.01973e-05	-9.36328e-06	-4.55462e-06	-1.26848e-05	-7.24261e-06	-9.79632e-07	-5.73028e-06	-1.81003e-05	-1.70397e-05	-1.05972e-05	-6.19064e-06	-2.23163e-06	-8.68251e-06
-4.97338e-06	3.09797e-06	7.02975e-06	-8.81314e-06	-4.78212e-06	5.97306e-06	-2.79049e-06	-5.21379e-06	5.12144e-06	-9.30122e-06	5.32258e-06	3.16603e-06	-3.83885e-06	-1.30631e-05	-4.63148e-06	-1.00358e-05	-2.91449e-06	-1.47051e-05	-1.58164e-05	-1.9027e-05	-2.07155e-05	-1.36898e-05	-1.2406e-05	-1.00195e-05	-1.4791e-05	-9.29305e-06	-1.08491e-05	-2.19288e-06	-9.88666e-06	-1.0633e-05	-1.39168e-05	1.37633e-06	-1.32156e-05	-2.53272e-05	-2.56663e-05	-1.61874e-05	8.46559e-06	-6.89111e-06	-1.37077e-05	9.2461e-08	-1.62929e-05	-4.89323e-06	-5.45396e-06	-2.30938e-06	-1.54273e-05	-9.43553e-06	-7.56382e-06	-1.93907e-06	2.80446e-06	-1.52253e-05
1.38068e-05	1.40121e-05	9.46779e-06	-2.65325e-06	-8.54879e-06	-1.02608e-06	3.46007e-06	6.46063e-06	-2.97099e-06	-6.15154e-06	4.87099e-06	-4.53416e-06	-5.92694e-06	-1.86683e-05	-3.16703e-06	-1.39008e-05	-1.51732e-05	-7.65359e-06	-1.8672e-05	-1.54915e-05	-1.42399e-05	-1.0197e-05	-1.09254e-05	-2.68181e-06	-1.31757e-05	-2.02418e-06	-8.06121e-06	-9.01573e-07	-1.05857e-05	-8.31588e-06	-6.43244e-06	6.80047e-06	-4.6215e-06	-1.08148e-05	-2.37051e-05	-9.73218e-06	1.05143e-05	5.2616e-06	-5.46825e-06	1.22587e-06	-1.08931e-05	4.71452e-06	-1.95753e-06	-2.04358e-07	3.33769e-06	-3.9063e-06	-9.93035e-06	-8.71477e-07	1.52999e-06	-1.37636e-05
-5.98486e-06	-8.10091e-07	9.69554e-06	-3.36729e-06	-1.26567e-05	2.42653e-06	4.99778e-06	1.01033e-05	-3.8881e-06	-2.91942e-06	-1.74181e-06	8.60665e-07	-6.15276e-06	-8.49179e-06	-1.00073e-06	-1.03494e-05	-1.15827e-05	3.42467e-06	-1.72921e-05	-1.62113e-05	-9.36636e-06	-1.46572e-05	-6.296e-06	-1.81666e-05	-8.24861e-06	4.02697e-06	-9.294e-06	-1.59305e-05	-1.81769e-06	6.99428e-07	-1.32332e-05	-6.77295e-06	-2.92152e-06	-3.00752e-06	-1.87642e-05	-9.656e-06	4.78251e-06	-2.75637e-06	1.65509e-06	5.68751e-07	-2.30172e-06	2.90409e-06	-7.43624e-06	9.17776e-06	-2.40144e-06	3.31329e-06	-8.98753e-07	1.23596e-06	5.01914e-06	-8.6615e-06
-1.64885e-06	-1.95569e-06	1.67261e-05	-1.23956e-05	7.04682e-06	-2.99644e-07	-4.3339e-07	1.6032e-05	-9.33817e-07	-6.47679e-06	-6.59571e-07	-2.35319e-06	-3.28194e-06	-5.29867e-06	-7.2172e-06	-7.85151e-06	-1.70842e-05	4.59162e-07	-6.70352e-06	-6.28598e-06	-1.88249e-05	-4.33469e-06	-6.94756e-06	-1.37925e-05	-6.95578e-06	-9.15781e-06	-1.33673e-05	-1.23259e-05	-6.10093e-07	-3.79244e-06	-4.04088e-06	-1.89223e-05	4.32073e-06	-5.7673e-06	-1.75015e-06	-2.25495e-06	-7.58488e-06	-5.82164e-06	-8.48034e-06	1.92403e-06	-2.12019e-06	2.90764e-07	-1.4984e-05	3.77135e-06	-2.141e-07	1.30391e-05	-1.61931e-06	-1.87293e-06	1.17929e-05	-5.0631e-06
3.8731e-06	2.2355e-06	1.10624e-05	-8.61992e-07	-1.50831e-06	-7.29146e-07	2.74798e-06	8.199e-06	-7.84616e-06	-8.90419e-06	-4.19607e-06	-6.40652e-07	-8.12312e-06	-5.81096e-06	-8.83684e-06	-6.0481e-06	-1.49026e-05	-1.64966e-05	-1.40724e-05	-5.82789e-06	-2.13466e-05	-2.76107e-06	-2.04029e-06	-6.7429e-06	-1.04829e-06	-6.63043e-06	-7.31664e-06	-3.24596e-06	-3.56227e-06	-1.26671e-06	-1.06105e-06	-2.68049e-06	7.74706e-06	-2.23767e-06	2.38162e-06	5.92522e-06	-2.04716e-06	-3.66183e-06	6.07194e-07	5.35721e-06	3.04393e-07	8.9548e-06	-7.20351e-06	3.20402e-06	1.62508e-06	7.27554e-06	-8.49644e-06	6.79465e-07	9.16489e-06	5.40309e-06
1.39613e-05	-3.13176e-06	8.31213e-06	1.04449e-06	-3.49086e-06	7.75438e-06	1.39415e-05	2.97607e-06	-3.65812e-06	-2.61033e-06	-1.1599e-05	2.83342e-06	-4.77176e-07	-1.96785e-05	-8.21381e-06	-6.74513e-06	-1.15512e-05	-1.62303e-05	-1.34422e-05	-1.27786e-05	-9.25184e-06	-4.64711e-06	-1.91261e-06	-2.67334e-06	5.62623e-06	-2.70884e-06	2.92801e-06	-5.43398e-06	4.73094e-06	8.92907e-06	-6.62984e-07	1.37171e-06	-1.8317e-06	-3.04838e-07	6.86789e-06	7.49558e-07	3.27692e-06	5.93695e-07	9.68773e-06	-3.75137e-06	1.13816e-05	5.673e-06	5.39227e-07	4.89734e-06	6.30032e-06	5.40771e-06	-6.4579e-06	-1.50012e-06	6.74806e-06	7.57686e-06
3.89658e-06	5.76478e-06	5.2359e-07	-8.60164e-07	4.58678e-06	-5.35026e-06	1.52645e-05	1.08055e-05	4.87951e-06	-4.00737e-06	-4.84208e-06	-4.42269e-06	6.07273e-06	-1.75134e-05	-8.429e-06	5.9176e-07	-3.79408e-06	-1.05136e-05	1.50326e-06	-2.21462e-05	-4.39857e-06	-4.34223e-06	-5.52742e-06	1.07589e-05	-1.96305e-06	3.03664e-06	5.83192e-06	-4.95449e-06	1.00373e-05	-1.59575e-06	5.05211e-06	-2.00288e-06	-5.94141e-06	2.85563e-07	1.6137e-05	3.39203e-06	4.32541e-06	5.05356e-06	-3.1975e-06	1.43415e-06	9.82004e-06	5.08405e-06	-1.83867e-06	6.59225e-06	9.16501e-06	2.70388e-06	5.1865e-06	1.04381e-06	-5.53351e-07	6.52513e-06
3.23823e-06	1.6121e-05	1.78405e-06	-1.76373e-06	-1.07375e-06	-1.741e-06	-2.81332e-06	-2.43801e-06	2.01375e-05	8.14652e-06	2.58383e-06	-1.03221e-05	3.03152e-07	-7.696e-06	-3.77562e-06	7.73643e-07	4.04177e-06	-2.07614e-05	3.71098e-06	-7.1109e-06	1.82076e-06	-1.22327e-06	-2.92659e-06	8.19555e-06	-3.16847e-07	1.42109e-06	2.20665e-07	5.97473e-07	1.22508e-05	-3.17304e-06	1.18269e-06	-6.15181e-06	1.60888e-06	4.28449e-06	1.53596e-05	7.0929e-06	4.65789e-06	6.8298e-06	-6.58508e-06	1.15203e-06	6.37974e-06	1.50472e-05	-3.59844e-07	5.02216e-06	1.07498e-05	9.86655e-06	8.53315e-06	7.94618e-06	2.25416e-06	6.39632e-06
5.87365e-06	1.24485e-05	-4.47256e-07	-1.68921e-06	9.00948e-06	5.20032e-06	2.5603e-06	-6.0806e-06	9.1315e-06	2.13622e-06	-4.10037e-06	-8.28347e-06	-1.32183e-05	-3.42606e-06	-5.65031e-06	-2.27788e-06	-4.62853e-06	-1.91548e-05	-1.22681e-07	5.35971e-06	6.30732e-06	3.88317e-06	6.38235e-07	-6.07683e-06	4.02162e-06	-3.09343e-06	-1.30899e-06	-2.67979e-06	1.16644e-06	7.66639e-06	1.53617e-06	7.10949e-06	1.08276e-05	3.40457e-06	1.22274e-05	3.80852e-06	1.40883e-05	1.6235e-05	-3.48433e-06	-1.17341e-06	4.91753e-07	1.53056e-05	9.21938e-06	8.3874e-06	1.1501e-05	-1.77592e-06	1.11924e-05	5.16539e-06	7.02419e-06	1.17723e-05
4.70452e-06	8.6428e-06	-3.31913e-06	6.16071e-06	8.45616e-06	9.79527e-07	2.13257e-06	-7.04865e-06	-9.10411e-06	-1.88471e-06	-9.12887e-06	4.48405e-06	6.29668e-07	-3.44299e-06	5.52127e-06	8.44534e-06	-7.13842e-06	-6.50663e-06	3.62162e-06	4.25537e-06	-1.1437e-06	2.07447e-06	-1.06304e-06	3.12758e-06	1.63235e-05	9.22766e-06	3.91454e-06	1.56165e-05	7.81685e-06	1.42923e-05	-2.78407e-06	9.02702e-06	1.03621e-05	2.09098e-06	1.25609e-05	-1.16668e-06	9.39466e-06	1.27196e-05	1.2552e-05	8.349e-06	-4.40462e-06	9.69007e-06	8.94972e-06	4.95725e-06	3.26603e-06	3.98019e-06	7.80305e-06	6.14442e-06	4.73528e-06	1.08667e-05
1.18005e-05	1.53435e-06	-1.27029e-07	8.37393e-07	4.05699e-06	2.46356e-06	2.22617e-06	-2.41855e-07	-1.06197e-05	-2.42063e-06	-4.63855e-06	-7.33276e-06	6.52964e-06	-6.12008e-06	6.77163e-06	7.00681e-06	-8.43854e-06	-5.07468e-06	9.69564e-07	-5.14831e-06	2.12412e-06	-3.12167e-06	1.87193e-06	1.48477e-05	7.47606e-06	1.27308e-05	7.29708e-06	1.76081e-05	1.06507e-05	5.98839e-06	5.08274e-06	1.85901e-05	9.6293e-06	1.02481e-05	1.06568e-05	9.75511e-06	8.89899e-06	4.45475e-06	5.84209e-06	6.817e-06	1.77058e-06	5.2025e-06	2.05712e-05	7.54499e-07	1.47021e-05	6.88615e-06	6.44958e-06	1.1411e-05	-2.02215e-06	1.07445e-05
3.76821e-06	8.09143e-06	-8.2084e-06	4.35178e-06	6.99066e-07	5.43548e-06	7.61271e-06	-5.49492e-07	1.25996e-06	-1.72487e-06	-9.07341e-06	-4.23021e-06	-1.36607e-06	-1.06428e-05	1.03587e-05	-1.20327e-06	-4.74521e-06	-4.46981e-06	-2.6147e-06	-1.2368e-06	7.6503e-07	4.35177e-06	9.91463e-06	8.46798e-06	9.98694e-06	9.12768e-06	5.73835e-06	5.36444e-06	7.26774e-06	1.11131e-05	6.808e-06	1.82397e-05	4.77696e-06	1.04845e-05	1.32649e-06	1.49689e-05	2.03573e-05	8.95425e-06	-1.72069e-06	1.82376e-05	-1.70871e-06	7.69719e-06	4.76186e-06	1.01552e-05	2.27109e-05	9.95211e-06	5.90706e-06	9.35005e-07	1.92599e-07	8.15607e-06
-5.13483e-06	5.3136e-06	-7.38325e-06	-5.45434e-06	-3.61111e-06	-3.28521e-06	7.82456e-06	3.57877e-06	-3.74513e-06	8.97933e-07	-2.87963e-06	-4.84488e-06	-1.0689e-05	-6.58036e-06	2.20822e-06	-8.35664e-06	8.18815e-06	-1.44592e-06	3.51416e-06	2.76797e-06	4.66755e-06	1.43243e-05	7.89513e-06	9.58348e-06	1.60395e-05	4.49269e-06	1.05411e-05	9.88654e-06	2.10619e-05	1.77205e-05	1.36059e-05	9.26254e-06	1.03992e-05	1.31752e-05	7.71125e-06	1.29399e-05	1.98295e-05	6.44577e-06	3.87767e-06	1.42884e-05	5.76647e-06	1.26722e-05	4.0894e-06	2.38812e-05	4.42321e-06	4.50893e-06	1.3033e-05	4.17083e-06	5.86854e-06	9.82117e-06
7.29352e-07	1.4399e-05	-7.42973e-07	-1.32368e-06	-1.13215e-05	-7.83442e-07	1.59062e-06	9.14628e-06	5.53988e-07	-2.02975e-06	5.2927e-06	6.9325e-07	-6.70828e-06	-8.14726e-06	9.71803e-06	7.48654e-06	4.66567e-06	1.24537e-05	-4.3916e-07	1.03697e-05	-1.26033e-06	2.94581e-06	1.10993e-05	1.50628e-05	2.50132e-05	1.15649e-05	9.97099e-06	8.09424e-06	2.97825e-05	1.37116e-05	1.68612e-05	6.41959e-06	1.04003e-05	1.68408e-05	1.04353e-05	1.8162e-05	1.38489e-05	7.73407e-06	7.45273e-06	2.05858e-05	1.5002e-05	8.49331e-06	3.26785e-06	1.57824e-05	3.15182e-06	7.68302e-06	1.25284e-05	1.03391e-05	2.14256e-05	1.29779e-05
4.56808e-06	5.13538e-06	-1.44728e-06	2.97166e-06	-1.14288e-05	-5.91236e-06	-1.15304e-06	-4.92152e-06	-3.23929e-06	-4.65286e-06	4.63645e-06	2.26682e-06	-4.68311e-06	-1.08827e-05	7.05251e-06	2.03641e-05	9.00068e-06	1.16891e-05	-5.26959e-06	1.72797e-05	1.40304e-07	1.24156e-05	1.5808e-05	1.26389e-05	1.32275e-05	7.07518e-06	6.56116e-06	1.38493e-05	2.02009e-05	1.35566e-05	2.33794e-05	9.76656e-06	1.6007e-05	9.07849e-06	1.55329e-05	2.00195e-05	1.35539e-05	1.42456e-05	1.58701e-05	1.56379e-05	1.46416e-05	1.17021e-05	9.85603e-06	1.14913e-05	1.17263e-05	9.86727e-06	2.32609e-05	1.71683e-05	1.57703e-05	1.70838e-05
-1.05458e-05	8.25869e-06	-1.82424e-06	-3.42476e-06	-5.49224e-06	-1.3126e-05	-3.22913e-06	-5.93509e-06	-7.63304e-06	5.27074e-06	1.94397e-06	2.03922e-06	-5.18252e-06	-1.59009e-05	1.10031e-05	1.5688e-05	3.12569e-06	6.20999e-06	-4.38023e-06	1.25184e-05	1.0833e-05	4.45157e-06	1.16405e-05	1.34767e-05	7.10057e-06	9.52548e-06	1.46272e-05	9.99321e-06	8.20419e-06	1.7253e-05	2.34938e-05	3.46157e-06	2.11562e-05	1.35021e-05	1.43911e-05	8.52091e-06	1.28473e-05	1.42189e-05	1.95006e-05	1.58441e-05	1.36537e-05	2.39497e-05	1.74173e-05	1.8761e-05	1.34421e-05	2.4797e-05	1.87663e-05	2.2864e-05	1.51933e-05	9.96851e-06
-4.43466e-06	1.13975e-05	8.20533e-06	-6.09229e-06	-8.07973e-06	-9.00873e-07	2.93983e-06	-2.78829e-06	-5.48182e-07	8.12713e-06	-1.83445e-05	4.07857e-06	-8.62155e-06	-2.7232e-06	-5.12311e-06	1.13687e-05	-2.91961e-06	6.67552e-06	-1.50287e-06	6.73569e-06	8.37885e-06	3.16684e-06	7.38904e-06	1.49311e-05	1.94871e-05	1.8327e-05	2.33815e-05	1.67401e-05	9.61e-06	1.29708e-05	2.02552e-05	8.94869e-06	1.47014e-05	2.30153e-05	1.40005e-05	5.55275e-06	1.06756e-05	1.92289e-05	2.14504e-05	1.13519e-05	1.41515e-05	1.57628e-05	2.64926e-05	9.06041e-06	1.472e-05	2.16654e-05	1.22399e-05	1.95593e-05	1.46101e-05	9.70391e-06
8.92673e-06	7.21131e-06	1.22005e-05	4.77024e-06	-3.25109e-06	9.7107e-06	7.69175e-06	-1.45117e-06	1.18797e-06	8.61818e-06	-2.26998e-05	3.79244e-06	-3.77912e-06	-5.29709e-06	-6.92895e-07	5.86908e-06	3.48924e-06	9.26056e-06	1.94869e-06	1.32777e-05	3.0113e-06	7.07906e-06	1.08119e-05	1.78966e-05	2.72261e-05	1.30728e-05	1.66645e-05	1.04608e-05	9.11593e-06	1.91396e-05	1.33771e-05	2.5379e-05	1.82777e-05	2.04509e-05	2.84734e-05	7.02064e-06	2.21072e-05	1.50912e-05	1.60751e-05	1.76253e-05	1.16113e-05	1.23453e-05	1.15632e-05	1.68497e-05	1.54934e-05	1.4704e-05	1.07475e-05	1.27971e-05	1.15899e-05	8.77876e-06
7.65407e-06	1.11277e-05	7.68209e-06	1.56375e-06	-4.27064e-06	6.8957e-06	8.64641e-07	9.60177e-07	4.5139e-06	-1.3856e-06	-1.78505e-05	-5.09177e-06	-3.56766e-06	-7.96696e-06	6.41179e-06	8.27528e-06	1.46217e-05	1.13141e-05	4.16763e-07	1.60893e-05	4.56681e-06	1.88537e-05	1.54016e-05	1.1722e-05	1.91819e-05	1.48657e-05	1.68884e-06	1.49626e-05	1.93308e-05	1.88859e-05	1.38364e-05	2.91878e-05	1.7559e-05	2.02058e-05	1.4352e-05	1.64348e-05	2.03064e-05	1.5259e-05	1.78387e-05	1.69332e-05	1.63314e-05	2.54182e-05	1.4085e-05	1.64386e-05	1.09282e-05	1.86505e-05	1.07545e-05	1.73946e-05	1.28486e-05	-1.16131e-06
3.24569e-06	3.71148e-06	-8.6462e-07	-3.79173e-06	-6.00357e-06	-3.94392e-06	-4.75947e-06	3.24005e-06	-4.16338e-06	6.12173e-06	-8.24703e-06	1.15977e-06	2.15571e-06	-5.67195e-06	1.65865e-05	6.38838e-06	1.30199e-05	4.79034e-06	9.61168e-06	1.95868e-05	9.05489e-06	1.77211e-05	1.72702e-05	1.43188e-05	1.82203e-05	1.80259e-05	1.72918e-05	1.53259e-05	1.97402e-05	1.3635e-05	2.02493e-05	1.53047e-05	1.66123e-05	2.06064e-05	9.18807e-06	1.64999e-05	1.98457e-05	1.38679e-05	1.67216e-05	3.20644e-05	2.29234e-05	2.39168e-05	2.23413e-05	1.8843e-05	8.71957e-06	1.45043e-05	1.66542e-05	1.92537e-05	4.76947e-06	7.41782e-06
4.39918e-06	6.17834e-06	-3.64942e-07	4.00776e-06	1.94025e-06	-1.27381e-05	1.59195e-07	-9.15701e-06	-2.19542e-06	6.44475e-06	4.65733e-06	8.4508e-07	-5.16356e-07	-3.56365e-06	1.07311e-05	6.54744e-06	2.07271e-05	1.48234e-06	2.55122e-06	1.8185e-05	1.174e-05	1.8563e-05	1.01769e-05	1.64403e-05	2.0846e-05	2.44922e-05	2.53943e-05	1.93238e-05	2.64982e-05	1.90096e-05	1.71086e-05	1.4696e-05	1.67197e-05	9.79608e-06	1.59569e-05	1.65199e-05	2.80055e-05	1.28605e-05	2.48186e-05	2.22612e-05	1.31684e-05	2.22134e-05	1.29024e-05	1.90838e-05	5.71387e-06	1.46982e-05	1.31953e-05	1.42392e-05	9.14679e-06	4.49862e-06
7.90131e-06	1.12806e-05	-9.22193e-06	2.78939e-06	-3.61329e-06	-1.87805e-05	1.75783e-06	-1.60435e-06	-8.5968e-06	-2.64348e-06	6.10889e-06	2.88294e-06	-6.49086e-06	-1.30755e-06	1.21094e-05	1.85398e-05	1.46784e-05	1.123e-05	1.15696e-05	1.49147e-05	8.98031e-06	2.03957e-05	1.89729e-05	2.5216e-05	1.35298e-05	2.55062e-05	1.87227e-05	2.11195e-05	2.85914e-05	2.93264e-05	1.33734e-05	1.62597e-05	1.3259e-05	1.65889e-05	9.18787e-06	1.22418e-05	2.40544e-05	1.18513e-05	2.37601e-05	1.78465e-05	5.66867e-06	1.74964e-05	1.09526e-05	2.10678e-05	6.1053e-06	9.51113e-06	1.48819e-05	5.60074e-06	3.06088e-06	7.89412e-06
3.91988e-06	6.49202e-06	5.53976e-07	5.92059e-06	-7.96323e-06	-8.2243e-06	1.51414e-06	-4.59291e-06	-1.20976e-06	2.4254e-06	-4.12674e-06	-3.30148e-06	9.77614e-06	8.68982e-07	-2.08721e-06	7.51808e-06	8.50614e-06	1.16916e-05	1.11966e-05	1.40489e-05	1.05391e-05	1.55139e-05	2.24509e-05	2.03615e-05	2.14247e-05	2.63078e-05	1.90466e-05	1.3386e-05	1.93712e-05	2.96078e-05	1.57099e-05	1.54244e-05	1.80361e-05	1.64232e-05	2.60341e-06	1.85316e-05	2.2966e-05	1.2427e-05	1.54825e-05	2.30445e-05	1.32129e-05	6.828e-06	1.35217e-05	1.34548e-05	8.59125e-06	4.69098e-06	1.25758e-05	5.6711e-06	1.10981e-05	1.24606e-05
-6.31519e-06	-1.47569e-06	-9.30809e-07	4.62258e-06	6.39174e-06	-1.13076e-05	4.95917e-06	2.90301e-06	1.37248e-06	4.5992e-06	3.84023e-07	-5.08497e-06	6.10338e-06	4.63369e-06	8.1561e-06	-2.87794e-06	6.44763e-06	1.03519e-05	1.232e-05	5.85499e-07	1.21423e-05	1.93276e-05	3.12904e-05	1.30312e-05	2.35214e-05	1.61285e-05	1.52892e-05	7.70625e-06	-9.69039e-07	1.52492e-05	7.58399e-06	1.70168e-05	1.99993e-05	8.2272e-06	1.1226e-05	1.99749e-05	9.75335e-06	7.49136e-06	1.40461e-05	2.01983e-05	8.96661e-06	1.04685e-05	1.05049e-05	1.68383e-05	1.50307e-05	9.66408e-06	1.30306e-05	1.40976e-05	1.27877e-05	1.16248e-05
-2.21254e-06	-5.28909e-06	-3.09734e-06	1.41167e-06	-4.49485e-06	-1.42867e-05	1.18669e-06	7.17763e-06	-4.93772e-06	-3.807e-06	5.75411e-06	-2.73375e-06	-1.08094e-05	4.48468e-07	3.80113e-06	3.77437e-06	1.35204e-05	9.315e-06	1.69995e-05	6.59401e-06	9.60741e-06	2.14093e-05	2.28479e-05	8.33229e-06	1.51516e-05	1.28308e-05	1.28014e-05	-3.97852e-07	9.50232e-06	9.29432e-06	8.63657e-06	6.83915e-06	1.64623e-05	-2.28988e-06	9.35506e-06	1.39134e-05	1.10598e-05	1.04472e-05	1.05164e-05	1.6995e-05	1.76072e-05	1.41523e-05	2.03518e-05	1.41502e-05	9.78054e-06	1.45299e-05	1.81685e-05	1.13852e-05	9.15431e-06	1.17193e-05
-2.3362e-06	-8.49757e-06	-2.29011e-06	-2.49905e-06	-1.02812e-05	-1.61415e-05	-2.00043e-06	1.47752e-05	2.76222e-07	-5.28912e-06	8.99976e-06	-5.66915e-06	-4.86132e-06	1.00205e-06	1.26402e-06	6.61383e-06	9.44446e-06	7.94291e-06	1.73468e-05	1.34342e-05	5.78319e-06	1.75974e-05	1.18155e-05	1.07526e-05	2.19395e-05	3.45133e-06	1.72071e-05	6.46539e-06	1.45293e-05	5.53718e-07	9.41553e-06	1.3088e-05	1.11813e-05	-3.7722e-06	1.38894e-05	9.97015e-06	5.8702e-06	4.68861e-06	8.5229e-06	1.14251e-05	-9.10686e-07	1.07345e-05	1.34487e-05	1.95063e-05	1.15896e-05	1.07967e-05	1.60164e-05	1.04274e-06	1.38777e-05	9.05283e-06
-4.90576e-06	-5.2206e-06	-3.47802e-06	2.62839e-06	-3.40262e-06	-1.44032e-05	1.05806e-06	9.03584e-06	3.22092e-06	4.3226e-06	1.90046e-06	6.6137e-06	-1.73251e-06	5.11775e-06	9.83887e-06	1.88211e-06	1.47898e-05	1.10301e-05	1.54748e-05	1.56396e-05	8.32387e-06	1.43172e-05	1.83021e-05	1.16379e-05	1.69138e-05	8.89507e-06	2.46181e-05	7.70334e-06	9.9851e-06	3.42065e-06	1.22344e-05	1.79142e-05	1.30166e-05	1.12631e-06	9.96987e-06	9.356e-06	8.27364e-06	7.46222e-06	1.42504e-05	1.02117e-05	-3.57157e-06	1.03569e-06	1.28635e-06	1.17954e-05	1.25836e-05	6.50557e-06	1.70612e-05	8.01961e-06	7.96151e-06	8.72856e-06
-6.69289e-06	-8.53862e-06	5.1998e-06	6.38532e-06	-8.76608e-06	-6.65962e-06	5.53101e-06	3.90113e-06	4.28387e-06	2.76453e-06	-2.59483e-07	8.19106e-06	-1.2881e-05	6.36577e-06	1.78753e-06	2.43943e-06	1.61253e-05	6.44108e-06	1.41846e-05	2.16342e-05	1.031e-05	1.223e-05	1.80861e-05	1.48556e-05	1.40956e-05	1.73735e-05	1.58189e-05	7.19334e-06	4.28407e-06	6.16132e-06	1.20085e-05	1.67075e-05	8.40071e-06	1.00153e-05	-5.44472e-07	9.51111e-06	-2.21455e-06	1.32915e-05	1.54996e-05	1.20169e-05	5.28784e-06	5.2588e-06	-8.47503e-06	9.21699e-06	-1.15125e-06	2.38956e-06	9.32368e-06	-1.14619e-06	9.50806e-06	7.73051e-06
-7.39079e-06	-2.26578e-07	-1.04711e-06	2.89688e-07	-7.32973e-06	9.71803e-08	-4.17276e-06	-1.10954e-07	6.15603e-06	-3.59984e-06	-4.19552e-06	-2.35126e-06	-6.90464e-06	8.22761e-07	-5.32791e-06	-4.84731e-06	6.28678e-06	1.16995e-05	8.11341e-06	6.92212e-06	1.9042e-06	1.87695e-05	3.7054e-06	1.59614e-05	1.92595e-05	7.78042e-06	7.84877e-06	4.23962e-06	2.23942e-06	1.95094e-05	6.76653e-06	5.67096e-06	6.98891e-06	5.23663e-06	1.55639e-06	2.7201e-06	1.54598e-05	9.39364e-06	1.31419e-05	1.16965e-05	1.73093e-07	1.8189e-05	-5.76118e-06	-1.438e-07	1.76071e-06	5.73645e-06	5.72645e-06	9.89172e-07	1.1413e-05	1.35707e-05
-8.32434e-06	5.57334e-06	4.92636e-06	-4.88677e-06	3.98326e-07	-6.15052e-06	-2.44822e-06	9.96691e-07	1.22214e-06	-5.96705e-06	-4.03438e-06	8.55845e-06	-3.36033e-06	8.40952e-06	-4.98695e-06	7.58658e-06	1.10098e-05	-1.06652e-06	3.47341e-06	6.57483e-06	1.59466e-05	1.27988e-05	6.99765e-06	8.33599e-06	1.35932e-05	7.79494e-06	1.47753e-06	4.30645e-06	7.35861e-06	1.1363e-05	5.06519e-06	1.16265e-05	1.99057e-06	5.44808e-06	7.53605e-06	6.83545e-06	1.5943e-05	-8.90593e-06	1.38068e-05	1.19222e-05	-3.26749e-06	1.38365e-05	6.64723e-06	-2.60097e-06	8.31314e-06	6.89922e-06	7.02439e-07	1.84033e-06	6.42592e-06	1.83391e-05
1.03312e-06	-5.62997e-07	1.20048e-07	1.63621e-05	1.48023e-05	-1.08014e-05	5.76937e-06	-9.78244e-07	1.39339e-06	-2.82847e-06	-9.3874e-06	7.11005e-06	-7.92038e-06	2.45473e-06	9.58358e-06	1.17358e-05	6.93718e-06	9.35994e-06	4.62432e-06	2.89497e-06	7.54853e-06	1.77557e-05	8.73635e-06	8.21504e-06	6.88312e-06	1.24577e-05	5.14027e-06	1.24896e-06	5.28101e-06	-2.96971e-06	-3.59496e-06	-1.4276e-06	-5.351e-06	2.10526e-06	-8.22619e-08	9.81503e-06	7.90638e-06	2.54175e-06	1.37871e-05	2.28068e-05	1.47484e-05	1.05945e-05	1.28351e-05	-7.9167e-06	3.18406e-06	-3.86955e-07	-3.03469e-06	-7.98571e-06	3.93844e-06	4.6698e-07
-2.54078e-06	7.8291e-06	-3.17579e-06	1.31673e-05	1.06686e-05	-7.56936e-06	5.63107e-06	4.72586e-06	-8.72789e-06	-1.40593e-06	-3.39905e-07	1.81374e-05	-6.33679e-06	-3.91116e-06	5.96834e-06	1.35536e-05	1.91539e-05	1.61601e-06	4.49147e-06	2.26345e-06	8.32808e-06	7.97851e-06	7.57056e-06	1.10351e-05	1.81273e-05	3.72178e-06	1.15721e-05	-6.62151e-06	6.48095e-06	-5.04768e-06	-3.52264e-06	2.14832e-06	6.09286e-06	8.55505e-06	2.2334e-06	4.77123e-06	8.28836e-08	7.77503e-06	-4.42592e-07	9.17361e-06	6.59622e-06	1.66104e-06	6.88741e-07	3.8197e-06	1.67955e-06	6.43014e-06	-8.66012e-06	-5.25712e-06	1.06692e-05	-4.32137e-07
-3.51486e-06	9.54707e-06	5.15287e-06	7.61139e-06	7.83734e-06	-6.83363e-06	1.23617e-05	4.63027e-06	-1.6831e-05	-4.44902e-06	-4.86489e-06	2.08482e-05	6.92006e-06	-6.54605e-06	9.30011e-06	3.10061e-06	1.57867e-05	3.63559e-06	6.94399e-06	-3.47597e-06	1.30135e-06	2.33982e-06	1.85623e-06	4.82342e-06	4.5673e-06	3.42803e-06	-2.4431e-06	-8.93331e-06	3.72667e-06	-8.05076e-06	1.77589e-07	8.22759e-06	6.58535e-06	1.27861e-05	2.83759e-06	1.10194e-05	-9.44696e-06	-3.60219e-06	9.34139e-07	-1.0634e-05	2.69895e-06	4.50987e-06	-3.45104e-06	7.10675e-06	-1.99185e-06	1.37584e-05	-5.14243e-06	4.22178e-06	6.21481e-06	1.54441e-06
3.88522e-06	4.18238e-06	-5.06003e-06	-1.06992e-06	1.39305e-06	-9.40507e-07	6.3863e-06	4.15533e-06	7.37137e-06	-1.78791e-07	-5.20854e-06	1.58849e-05	-7.95482e-06	5.87444e-06	7.36344e-06	1.06961e-05	2.17969e-06	8.44642e-06	7.80029e-06	-3.3361e-07	-1.98342e-06	1.08749e-05	1.31335e-06	5.85071e-06	3.32661e-06	-6.18387e-07	1.16912e-06	-1.59911e-05	7.62229e-06	-1.42372e-06	-1.04242e-06	6.22094e-06	3.00506e-06	8.64521e-06	-9.24124e-07	-4.93883e-07	4.42703e-06	-6.15982e-06	1.04321e-05	-1.13605e-05	1.74448e-06	4.84264e-07	3.60886e-07	-1.02909e-05	7.03236e-07	1.33016e-06	-1.04961e-05	1.80648e-06	-8.64353e-07	-3.44904e-06
1.38942e-05	-7.07152e-06	-2.07207e-06	-1.41429e-05	-4.28776e-07	-6.01988e-06	-3.80341e-07	7.077e-06	9.68206e-06	-7.18411e-06	3.54913e-06	2.68323e-06	-1.43855e-05	9.49008e-06	-1.03045e-06	5.0808e-06	2.32818e-06	1.47539e-05	9.33171e-06	5.87828e-06	-2.33362e-06	2.67581e-06	-9.8504e-06	-8.17169e-06	8.11906e-06	-1.28301e-06	-5.89159e-06	-1.04307e-05	1.00833e-05	-2.15395e-06	-1.22727e-05	2.73371e-06	-2.30257e-07	7.08705e-07	-1.24709e-06	-1.17404e-05	4.91514e-06	-1.56584e-06	4.97745e-06	-1.48841e-05	3.62989e-06	-7.10418e-06	-7.12996e-06	-5.72033e-06	4.76467e-06	2.16421e-06	-8.47299e-06	-6.07005e-06	-5.60103e-06	-1.11001e-06
4.54522e-07	-1.80024e-05	3.59348e-06	-1.09647e-05	-1.52584e-05	3.93732e-07	2.08511e-05	-1.05214e-05	-5.35291e-06	6.05835e-06	-1.58406e-06	-1.09886e-05	-4.26912e-06	1.38384e-05	-1.38423e-06	7.03399e-06	1.51572e-05	-1.00976e-06	9.62433e-06	8.53971e-07	5.75373e-06	1.63211e-06	-6.9691e-06	-7.11048e-06	-1.2434e-06	-2.28759e-06	-5.352e-06	-3.77449e-06	6.89623e-06	-1.92029e-06	-1.46863e-05	1.51121e-06	-1.51701e-05	1.4494e-06	-1.16383e-07	-2.24091e-05	-3.04769e-06	-6.76564e-06	7.15276e-06	-3.67968e-06	8.39472e-06	-8.93636e-06	-1.5402e-05	-1.12176e-05	-1.20941e-06	6.51999e-06	-3.36628e-06	-1.35876e-05	-2.28435e-06	-2.64141e-06
-1.28947e-06	1.89911e-07	5.71998e-06	-5.75279e-06	3.2401e-06	1.36144e-06	6.95696e-06	3.90939e-06	-3.51073e-06	-3.08505e-07	5.50347e-06	-7.14738e-06	-8.24283e-07	-3.30832e-06	1.02682e-05	3.10431e-06	1.06541e-06	-3.55442e-06	1.32054e-05	-6.8195e-06	4.25903e-06	-8.58008e-06	-5.25002e-06	-2.59016e-06	-8.92398e-06	-1.50541e-05	-9.49401e-07	3.29337e-06	-5.25897e-06	-5.39563e-06	-1.21832e-05	-8.10767e-06	-2.34208e-06	1.76225e-06	-4.41049e-06	-5.82616e-06	-8.03498e-06	-3.53015e-06	9.59524e-07	-1.06354e-05	-3.41495e-06	-4.44776e-06	-1.15374e-05	-7.86744e-06	-6.06569e-06	-2.08339e-06	-2.82639e-06	-4.45063e-06	5.52198e-06	7.51922e-06
-1.98504e-06	7.62831e-06	3.98573e-06	7.40458e-06	5.84934e-06	1.37802e-05	1.15144e-05	2.50459e-06	-5.26983e-06	8.09881e-06	3.51134e-06	-1.47612e-06	6.13129e-08	-1.41384e-05	-3.01011e-06	1.13126e-05	-2.24643e-06	-6.53418e-06	7.44043e-06	-6.65567e-06	-2.00093e-07	-1.81519e-06	2.16175e-06	-7.2347e-06	-6.21727e-06	-1.29335e-05	-9.88666e-07	-9.53114e-06	-1.13566e-06	-7.77371e-06	-4.67381e-06	-9.02994e-07	-3.52578e-06	-4.74704e-06	-2.63112e-06	-8.72896e-06	-4.67538e-06	-9.09506e-06	-6.27497e-06	-1.51121e-05	-3.4603e-06	-8.41484e-07	-1.47057e-05	-1.05782e-05	-9.5138e-06	6.45717e-06	-1.33035e-05	-3.44331e-06	1.06997e-05	-3.45313e-06
2.24157e-06	1.05511e-05	5.17067e-06	-2.79486e-06	6.68504e-06	1.26909e-05	7.15095e-06	-3.42777e-06	-7.99226e-06	8.61092e-06	9.83955e-06	-1.1644e-05	3.24227e-06	4.37976e-06	-9.72122e-06	5.41632e-06	-1.26295e-06	-5.08805e-06	1.48161e-06	2.21382e-06	-5.88298e-06	3.66094e-06	-7.17153e-06	-8.68807e-06	-1.05351e-05	-1.65248e-05	-5.6638e-06	-2.12286e-05	-4.54873e-06	4.80082e-07	-3.6443e-09	9.88502e-06	6.01543e-07	-3.04943e-06	-8.00026e-06	-1.28395e-05	-6.12903e-06	-4.41739e-06	3.48873e-06	-1.0039e-05	-8.70708e-06	1.16463e-06	-9.94575e-06	-7.01048e-06	-1.86898e-06	3.86286e-06	-2.74634e-06	-1.67956e-06	-3.9893e-07	1.49022e-07
6.49128e-06	4.99956e-06	7.54667e-06	-3.64971e-06	7.89572e-06	4.75267e-07	-2.39908e-07	1.26796e-06	1.22231e-06	2.30342e-06	1.40038e-05	4.55249e-06	-1.05295e-05	7.53689e-06	-2.37945e-06	-6.24666e-07	1.88525e-06	1.0684e-06	-8.79257e-08	-1.07858e-05	-7.59264e-06	-5.20312e-06	-4.7642e-06	-9.17322e-06	-1.41861e-05	-8.20178e-06	7.43268e-07	-2.0748e-05	7.80837e-07	-7.94858e-06	-1.28014e-05	1.46005e-06	-6.73719e-06	7.14979e-07	-7.50226e-06	-1.54847e-05	-8.44581e-06	-5.6063e-06	1.33791e-06	-9.08004e-06	-8.65816e-06	1.87794e-06	-1.03082e-05	-1.26577e-05	-4.82099e-07	-4.71262e-06	3.86822e-06	-3.71092e-06	-5.46616e-06	-8.33491e-06
-1.25852e-06	4.39708e-06	1.28502e-05	-7.2104e-06	5.46581e-06	-9.48289e-08	-5.05077e-07	-1.29186e-06	5.0214e-06	-1.21947e-06	3.92205e-06	1.00355e-05	-5.24651e-06	3.92373e-06	-3.72339e-06	3.03758e-06	-4.26852e-06	-7.30153e-06	-8.10276e-06	-8.22596e-06	-1.12655e-05	-1.40975e-05	-6.87617e-06	-2.46612e-06	-1.14588e-05	3.74285e-06	-4.54679e-06	-1.68896e-05	1.85972e-06	-1.093e-05	-1.32146e-05	-9.40475e-06	-3.9243e-06	-2.60289e-06	-1.70364e-05	-6.92671e-07	-1.43171e-05	-8.20588e-06	-6.27085e-06	-1.43774e-05	-1.10779e-05	-1.58515e-05	-1.55363e-05	-8.04348e-06	-3.58483e-06	-1.72968e-06	-7.23209e-06	-5.2553e-07	-5.64707e-06	-4.59278e-06
1.54825e-06	7.92643e-06	9.50106e-06	-8.70394e-06	-7.61782e-06	-7.48811e-06	1.07613e-05	-1.29572e-05	-3.8142e-06	1.8153e-06	-1.13428e-05	4.4261e-06	1.71251e-07	-2.85095e-06	6.24715e-07	2.28311e-06	-2.23621e-06	-4.37504e-06	-6.22346e-06	-2.23434e-05	-5.86388e-06	-3.36294e-06	8.30529e-06	-1.41404e-05	-6.42526e-06	-9.77388e-06	-1.18793e-05	-1.54851e-05	-7.91025e-06	-1.66172e-05	-1.71554e-05	-5.24892e-06	5.21227e-06	-2.10141e-06	-5.42888e-06	-6.7733e-06	-1.18589e-05	-7.7523e-06	-5.48412e-06	-1.27888e-05	-1.00498e-05	-3.90294e-06	-5.95692e-06	7.96463e-07	-4.18039e-06	-3.12038e-06	-4.03908e-06	-1.23176e-05	-4.65808e-06	-9.94075e-06
-3.98476e-06	2.45723e-05	1.55724e-05	-4.46607e-06	-1.26876e-05	-8.6656e-06	-3.77156e-06	-2.85685e-06	-2.76766e-06	1.47559e-06	-9.43896e-06	1.49927e-05	-7.63798e-06	6.3154e-06	8.03572e-06	-4.50013e-06	-3.83327e-06	-1.67149e-06	-1.13371e-05	-2.17428e-05	-1.32677e-05	-2.07933e-06	-6.3643e-07	-7.83886e-06	-6.27403e-06	-6.24396e-06	-7.23856e-06	-6.73851e-06	-4.77153e-06	-1.58836e-05	-1.81147e-05	-1.40413e-05	-6.56089e-07	-1.16204e-05	3.81728e-06	3.1768e-06	-1.24376e-05	-1.1399e-05	-8.89196e-06	-1.86863e-05	-1.39178e-05	1.84445e-06	-6.5642e-06	3.45129e-06	-8.61291e-06	2.70825e-06	-8.75425e-06	-1.73404e-05	-1.0416e-05	-1.52876e-05
-6.53618e-06	2.43585e-05	5.69807e-06	1.23967e-05	9.77087e-07	-1.53802e-05	-9.58754e-06	1.84429e-05	-1.28551e-05	-5.56448e-06	-2.84637e-06	5.19164e-06	-8.23504e-06	-9.8329e-06	-7.08985e-06	-3.43498e-07	-9.72739e-06	-6.23659e-06	-1.68149e-05	-1.44526e-05	-1.74299e-05	-4.77457e-06	-1.01213e-05	2.86399e-06	-2.08227e-06	-9.6515e-06	3.69126e-06	-3.78334e-06	-1.49238e-05	-4.59681e-06	-2.50113e-05	-1.27346e-05	-1.69675e-05	-1.23011e-05	-1.56626e-05	-1.69023e-05	-2.03462e-05	-2.02796e-05	-1.15915e-05	-1.38312e-05	-6.93574e-06	-9.05976e-06	-1.12717e-05	-2.02747e-05	-1.45022e-05	-4.97542e-06	-5.12684e-06	-4.95255e-06	-1.78423e-05	2.37595e-06
-2.01795e-06	1.03012e-05	-1.57917e-06	2.03453e-06	-2.99089e-06	-1.08179e-05	-3.78545e-06	7.66868e-06	8.70757e-06	3.24627e-06	3.84307e-06	-7.92497e-06	-8.16782e-06	-2.41e-06	-4.40205e-06	-7.8079e-06	3.47723e-06	-1.13057e-05	-1.68124e-05	-1.19905e-06	-1.201e-05	-1.32555e-05	-1.66779e-05	-1.43054e-05	4.17e-06	-1.37767e-05	1.68372e-07	-1.00435e-05	-1.58515e-05	-7.09165e-06	-1.4176e-05	-3.06445e-06	3.1831e-06	-1.71477e-05	-1.53678e-05	-1.46841e-06	-7.20336e-06	-2.05932e-05	4.54196e-06	-1.10853e-05	-1.92175e-05	1.3688e-06	-1.94969e-05	-3.50579e-06	3.1424e-06	-1.08594e-06	-1.23006e-05	-1.41371e-05	-2.36253e-05	4.79637e-06
-1.07454e-05	3.02263e-06	7.93383e-06	3.86918e-06	-8.92752e-06	3.97608e-06	7.42325e-06	-6.30862e-06	3.44268e-06	-7.05787e-06	-1.95016e-05	-6.59017e-06	5.90506e-06	-4.34938e-06	-2.43075e-06	-7.563e-07	-8.93394e-06	-1.78001e-05	-1.56549e-05	-7.1278e-06	-1.16649e-05	-2.14697e-05	-1.85975e-05	-1.28393e-05	-5.76379e-06	-3.03522e-05	-1.08612e-05	-1.68151e-05	-2.17089e-05	-7.07182e-06	-2.2491e-06	-3.67753e-06	-2.07972e-06	-1.75154e-05	-1.41118e-05	-2.07749e-07	-1.52291e-06	-1.36641e-05	-3.91942e-06	-1.4337e-05	-1.32265e-05	1.30202e-06	-1.69855e-05	4.94568e-06	-6.15624e-06	-4.76001e-06	-7.29844e-06	6.0964e-08	-1.22289e-05	7.12645e-06
-5.60267e-06	1.74514e-06	-6.08637e-07	-6.79165e-06	6.80851e-06	-1.75266e-06	1.13214e-05	7.65725e-06	-1.68615e-05	-1.08205e-05	-2.28702e-05	1.3616e-06	4.41752e-06	-1.20124e-05	-2.86512e-07	3.79976e-06	-3.44088e-06	-2.68464e-05	-6.10435e-06	-2.038e-05	-1.20002e-05	-1.73105e-05	1.14098e-05	-1.59692e-05	-2.54005e-05	-3.40024e-05	-1.18869e-05	-2.0748e-05	-2.23925e-05	-1.00243e-05	3.10828e-06	-9.19169e-06	-1.44977e-05	-2.07732e-05	-1.83723e-05	-2.80916e-06	-7.12864e-06	-1.17408e-05	-1.76951e-06	-2.47507e-05	-8.17321e-06	7.77068e-07	-4.08198e-06	-7.30966e-06	-2.68371e-05	3.19e-06	-6.67248e-06	-1.7206e-05	1.36042e-07	1.67259e-06
-1.7336e-05	5.84664e-06	5.85202e-07	1.17802e-05	4.50595e-06	-7.74541e-06	6.93841e-06	-1.13303e-06	-1.43184e-05	-2.08363e-05	4.51747e-06	7.70751e-06	-1.04612e-05	-9.39776e-06	-1.26325e-06	1.54707e-06	-1.52072e-05	-2.24175e-05	-6.167e-06	-1.13269e-05	-4.93185e-06	-7.39948e-06	-7.99301e-06	-3.4708e-06	-1.43933e-06	-1.54345e-05	-8.78719e-06	-2.77718e-05	-1.21423e-05	-1.42483e-05	-1.15831e-05	-2.37947e-05	-1.60546e-05	-1.64331e-06	-2.13087e-05	-8.47833e-06	-4.64976e-06	-7.14878e-06	-1.64074e-05	-1.11635e-05	-2.32669e-05	-9.17556e-06	2.07864e-06	-3.06181e-06	5.65044e-06	-1.34908e-05	-1.08403e-05	-2.64846e-05	1.82146e-06	-7.14051e-06
-8.13488e-06	7.45746e-06	9.17448e-06	-1.81607e-06	3.09102e-06	-8.79617e-06	-7.62787e-06	4.36329e-06	1.34148e-05	3.07197e-06	4.46133e-06	5.8016e-06	8.42195e-06	-1.09571e-05	-7.67234e-06	1.07995e-05	-8.49452e-06	-1.07717e-05	-1.32499e-05	-1.42011e-05	7.45091e-06	1.73525e-06	-8.25799e-06	-1.4466e-05	-1.16532e-05	-2.0708e-06	-1.99393e-05	-1.20208e-05	-1.30494e-05	-9.60748e-06	-1.4677e-05	-1.83409e-05	5.03819e-07	-2.36193e-05	-5.40863e-07	-9.99283e-06	-6.61744e-06	-1.67824e-07	-1.27946e-05	-1.17924e-05	-2.7095e-05	-6.90052e-06	-1.78688e-05	-1.49336e-05	-9.60198e-06	-3.54122e-06	3.19056e-06	-2.59839e-06	-8.73452e-06	-1.28998e-05
1.69098e-06	1.20762e-05	5.56258e-06	-4.20093e-06	-5.19317e-06	-1.69538e-05	-2.91033e-06	9.54388e-06	-1.06306e-06	1.27239e-05	9.32797e-06	4.37374e-06	-1.50831e-06	4.99366e-06	-3.7835e-06	8.48549e-06	-9.97162e-06	-1.38466e-05	-2.26425e-05	-1.1137e-05	3.47211e-06	-6.91193e-08	-6.1101e-06	-1.1496e-05	-4.89428e-06	-1.39127e-05	-8.16621e-06	-1.56222e-05	-4.46445e-06	-5.32984e-06	-1.43071e-05	-5.8328e-06	-3.1827e-06	-1.34463e-05	-1.25237e-05	-8.16978e-06	-2.63829e-05	-8.51367e-06	-2.56874e-06	-1.02547e-05	-2.32161e-06	-1.91804e-05	-1.23398e-05	-1.09529e-05	-1.63649e-05	-9.8295e-06	-8.18208e-06	-1.12027e-05	4.15931e-07	-8.44303e-06
-7.7133e-06	8.95733e-06	4.2814e-06	2.46129e-07	3.94269e-06	-1.45583e-05	-2.40175e-06	2.28947e-06	-8.58224e-06	-3.95398e-06	3.19036e-06	3.54052e-06	-6.74966e-06	4.35815e-06	-1.4711e-05	-5.71191e-06	-8.42634e-07	-1.66062e-05	-1.44633e-05	-6.78092e-06	-9.22885e-06	-4.12417e-06	-6.97876e-06	-2.46249e-05	-2.47259e-07	-1.07134e-05	-1.85514e-06	-1.34501e-05	-3.33039e-06	-5.60706e-06	-1.61851e-05	-6.71423e-06	-1.11877e-05	-3.40697e-06	-5.52846e-06	-1.71811e-05	-5.8807e-06	-1.00908e-05	-3.2867e-06	-1.44404e-06	-1.02104e-05	-1.01799e-06	-1.96132e-05	-4.44426e-06	-1.25502e-05	-7.33432e-06	-1.54329e-05	-1.83534e-05	9.43465e-06	-5.52667e-06
-6.30343e-08	1.12516e-05	1.68058e-06	2.8458e-06	-5.58004e-06	-1.72827e-05	1.52084e-06	-9.68273e-06	-7.16538e-06	-9.18915e-06	6.99569e-06	4.27902e-07	-9.14209e-06	-2.12365e-06	-7.02053e-06	-9.32812e-08	3.36188e-06	-2.07217e-05	-8.48206e-06	-1.24967e-05	-1.23143e-05	-1.02785e-05	-1.87916e-05	-1.78413e-05	-3.44571e-06	-1.77666e-05	-7.36069e-06	-2.30739e-05	-8.55353e-06	-1.43587e-05	-1.45054e-05	-8.6296e-06	-8.09554e-06	-5.12763e-06	1.17122e-05	-1.74507e-05	-3.94721e-06	-1.3584e-05	-9.70427e-06	-9.10158e-07	-1.74365e-05	1.01664e-05	-1.47526e-05	-9.74089e-06	-1.57493e-06	-7.68575e-06	-1.78962e-05	-1.42167e-05	1.17845e-05	-1.96029e-05
1.17146e-05	1.19385e-05	-4.08682e-06	-2.33598e-06	-4.01755e-06	-2.06246e-05	-6.40249e-06	-4.7723e-06	-2.83612e-06	-9.7472e-06	6.40926e-07	-6.8192e-06	-1.06681e-05	-7.53673e-06	1.3105e-06	-8.56851e-06	1.22518e-06	-2.02865e-05	-1.45769e-05	-6.74933e-06	-1.51332e-05	-6.07166e-06	-1.87991e-05	-2.54028e-06	-3.13091e-06	-2.15991e-05	-7.90973e-06	-1.49457e-05	1.06988e-06	-9.37003e-06	-1.39468e-05	-8.71347e-06	-7.57127e-06	-1.08117e-05	-8.80562e-06	-1.59488e-05	8.22283e-06	-3.13571e-06	-9.65576e-06	-9.11308e-06	-2.15144e-06	3.69469e-06	-2.39931e-05	-1.04325e-06	5.12316e-07	-1.82219e-05	-1.03103e-05	-1.00373e-05	-7.78698e-06	-7.52347e-06
9.51992e-07	8.07487e-06	7.84011e-06	3.78275e-06	2.40177e-06	1.15389e-06	1.37235e-05	-3.30712e-06	-1.02811e-05	-1.41652e-05	4.0318e-06	3.35985e-06	-5.44258e-06	-6.17545e-06	4.89265e-06	-1.24234e-05	-1.62537e-06	-5.70779e-06	-2.74192e-05	-7.28874e-06	-3.76361e-06	-6.33187e-06	-1.33664e-05	-1.60846e-05	-4.44018e-06	-2.44651e-05	-3.13755e-06	-1.5231e-05	-5.63301e-06	-1.37101e-05	-1.25463e-05	-1.53235e-05	-2.35115e-05	-1.47462e-05	-2.93122e-06	-6.63267e-06	2.68212e-06	1.95276e-06	2.71518e-06	-1.67061e-05	-2.44037e-05	1.12224e-05	-5.33249e-06	-1.20906e-05	-1.22862e-05	-6.57323e-06	-5.47583e-06	3.5551e-06	1.76292e-06	-4.57509e-06
-1.65704e-05	5.93371e-06	1.16094e-05	3.94587e-06	-8.87475e-06	-1.3096e-05	-4.86373e-06	8.01111e-06	-3.99768e-06	-2.62087e-06	9.43446e-06	-7.17746e-06	-8.38427e-06	-6.9644e-06	-7.95516e-07	-8.23511e-06	-5.38373e-06	-1.50638e-05	-8.00928e-06	-1.73832e-05	-1.84806e-06	-1.50722e-05	-1.79235e-05	-1.45238e-05	2.41156e-06	-1.68617e-05	-1.59613e-06	-2.16251e-05	-1.74801e-05	-9.07954e-07	-9.05833e-06	-2.97671e-06	-8.46657e-06	1.66174e-06	-4.7912e-06	7.52485e-06	-2.84119e-06	1.74194e-06	7.90839e-06	-1.23132e-05	-1.28539e-05	1.08545e-05	-1.93842e-06	-2.26701e-06	1.14727e-05	8.2126e-07	-5.78195e-06	-4.16622e-06	-5.0432e-06	-6.39726e-07
-4.44692e-06	1.12965e-05	2.3125e-05	4.00485e-06	-1.66669e-05	-7.78741e-06	-1.02071e-05	1.05978e-05	1.12369e-05	1.04963e-05	8.79785e-06	-5.76426e-06	-1.4776e-06	7.38795e-06	-5.82622e-06	-1.53781e-05	-5.91447e-06	-7.88775e-06	-6.24305e-06	-1.80213e-05	-1.05548e-05	-1.54365e-05	-7.39109e-06	-3.85097e-06	-2.37359e-06	3.14625e-06	-1.49138e-06	-1.73984e-05	-5.19302e-06	7.30535e-07	-1.26387e-06	-1.62158e-05	-1.07686e-05	-7.19665e-06	-9.59547e-06	-2.77092e-06	2.82838e-07	-1.64639e-06	-2.48876e-06	-1.06737e-05	-5.10291e-06	-1.48382e-07	-6.75497e-06	5.98171e-08	1.21227e-05	3.63135e-06	-2.04224e-07	-1.31493e-05	-2.4941e-06	-5.53566e-06
-4.52852e-06	-2.2999e-06	1.5117e-05	1.3419e-05	-1.54225e-05	-1.03873e-05	-1.47008e-05	4.88086e-06	-3.15418e-06	1.2586e-05	8.32955e-06	2.32596e-06	-9.40185e-06	5.12672e-06	-4.3879e-06	-1.18894e-05	-1.61083e-05	-2.048e-06	7.79322e-07	-1.06946e-05	-4.08687e-06	-4.56586e-07	3.34199e-06	1.39744e-06	-1.15323e-06	-6.61914e-06	-1.10334e-06	-1.03832e-05	-1.04873e-05	-1.20702e-05	-6.32374e-06	-9.94319e-06	-1.44134e-05	1.81613e-06	-1.41764e-05	-8.29008e-06	-5.39402e-06	6.6351e-06	-2.36431e-07	-1.18407e-06	-4.67011e-06	-8.50551e-06	-6.95459e-06	-3.10187e-07	1.38496e-05	3.63546e-06	5.33066e-06	-1.14686e-05	-2.21679e-06	-4.96752e-06
8.72144e-06	6.315e-06	6.15117e-06	2.19853e-05	7.65873e-06	-2.05594e-06	-7.38157e-06	-1.75996e-06	1.00313e-06	4.57336e-06	-2.62482e-06	9.40938e-06	-1.87278e-05	-4.8072e-07	7.07776e-06	4.93794e-06	-6.7624e-06	-1.28867e-05	-1.09305e-05	-1.79949e-05	3.70379e-06	-3.71971e-06	-3.30423e-06	-7.41234e-06	-1.06872e-05	-6.00099e-06	-1.34662e-05	-1.41504e-06	-2.30859e-06	-1.05214e-05	-1.55245e-06	-3.80683e-07	-5.26377e-06	9.19345e-07	-9.32217e-06	-2.17993e-05	-1.13041e-05	4.62915e-06	9.33882e-08	1.83864e-06	7.02306e-07	-1.06289e-05	3.12925e-06	6.96399e-06	1.3516e-06	9.00811e-06	2.28989e-05	-4.213e-06	2.0453e-06	2.87837e-06
-1.07585e-06	6.78664e-06	8.53844e-06	1.24283e-05	8.97036e-06	2.94909e-06	3.19744e-06	-2.769e-06	1.0105e-05	5.19939e-06	-2.82755e-06	-5.01197e-07	-1.37412e-05	4.89061e-06	1.13868e-06	-1.73348e-06	-3.12544e-07	-1.1632e-05	-2.20941e-05	-1.05812e-05	4.0393e-06	9.93945e-07	-1.041e-05	-9.98159e-06	-6.27574e-06	-9.34681e-06	-5.34058e-06	6.55753e-07	-1.51757e-05	-6.26503e-06	4.56512e-06	4.28457e-06	-9.69699e-06	6.9216e-06	-7.58133e-07	-1.34638e-05	8.91628e-06	-1.31277e-06	-4.09305e-06	1.92929e-07	8.92502e-06	-2.92004e-06	3.54103e-06	1.32962e-05	-9.99594e-06	-4.37884e-06	2.50541e-05	-4.39639e-06	1.49794e-05	2.89429e-06
5.53465e-08	9.86462e-06	-6.445e-06	1.11975e-06	5.01854e-06	1.12439e-05	2.84888e-06	3.59746e-07	-7.89528e-06	1.31656e-05	-2.07934e-06	5.31465e-06	-3.17076e-06	-3.04007e-06	-2.11855e-05	-1.40796e-05	-2.23536e-06	-9.20644e-06	-4.27443e-06	-1.30873e-05	-3.39925e-06	2.44902e-06	1.18813e-06	-2.97291e-06	-2.37153e-06	-4.06938e-06	4.37822e-06	-1.27035e-05	-5.95841e-06	1.07251e-06	6.36661e-06	-9.77838e-07	-9.60973e-06	1.94835e-06	-6.59932e-06	3.42393e-06	1.23607e-06	-7.274e-06	1.74389e-06	4.0291e-06	-1.70807e-06	-3.29163e-06	-1.02288e-05	9.75649e-06	-7.01347e-06	6.81109e-06	1.00902e-05	-3.54771e-07	6.48942e-06	1.34699e-06
1.44645e-06	1.0834e-05	-5.96817e-06	6.4462e-06	-6.94026e-06	-9.5879e-06	-9.83821e-06	1.52791e-05	-2.17164e-05	2.3404e-06	1.29304e-05	6.35636e-06	-1.02039e-06	-6.57134e-06	-2.14195e-05	-2.23942e-05	-1.9923e-08	-5.20112e-06	-5.38086e-06	-1.30711e-05	-5.03278e-06	-1.03841e-05	-1.43992e-05	-2.5997e-06	-1.33665e-06	-6.19845e-06	-3.25177e-06	8.82435e-06	-5.36441e-06	7.36084e-06	-1.09089e-06	-4.50982e-06	6.32878e-06	7.76204e-06	9.46e-06	1.1927e-05	4.89561e-06	5.00772e-06	-1.50921e-06	-3.2045e-06	1.08953e-05	7.6751e-06	3.93429e-06	7.58233e-06	1.26656e-05	-1.72892e-05	-1.3181e-05	6.64389e-06	-3.36756e-06	9.35675e-06
3.59144e-06	2.08749e-06	-3.52849e-06	7.81714e-06	2.34975e-06	-7.17356e-06	-3.76172e-06	8.22945e-07	1.46683e-05	6.05327e-07	-1.99701e-06	1.2219e-05	-1.44681e-06	5.18443e-06	6.29172e-06	-1.10917e-05	-1.01145e-06	-1.13256e-05	-1.34329e-05	5.20432e-07	-1.05273e-05	-7.5915e-07	-7.18037e-06	-1.69279e-05	-4.15139e-06	2.26447e-06	-2.40287e-06	-1.07984e-05	-6.28184e-06	-2.09874e-06	-1.02493e-05	2.99812e-06	-1.16529e-05	1.01346e-06	-1.84367e-06	-5.5063e-06	8.36889e-06	1.51852e-06	-1.03904e-05	-1.36486e-06	-3.8863e-06	3.10987e-06	8.04104e-06	2.22921e-06	2.3127e-07	-8.16514e-06	-1.06533e-05	3.86248e-06	3.67152e-06	1.12295e-05
-7.91253e-06	8.22525e-06	9.15516e-06	-3.4888e-06	3.31777e-06	-1.13797e-05	2.61413e-06	3.17059e-06	1.56902e-05	2.0303e-06	4.95212e-06	3.24042e-06	9.39129e-06	-7.39241e-06	1.40754e-06	-9.86542e-06	-4.88625e-06	-1.09386e-05	-4.61993e-06	-6.07257e-07	-5.02539e-06	4.34092e-06	1.11038e-05	-2.58561e-06	6.49948e-06	-5.54617e-06	7.39286e-06	-1.0978e-05	9.82935e-07	8.58562e-07	-9.23848e-06	-1.95301e-06	-7.71752e-06	5.73357e-06	-1.89796e-06	1.12176e-06	9.31785e-07	2.16148e-07	5.44268e-06	-4.34751e-06	-1.42561e-05	1.36723e-05	-7.65327e-06	-8.71275e-06	-1.41265e-06	3.2293e-06	-1.44848e-06	-3.71961e-06	-1.04909e-05	3.52396e-06
-5.5994e-06	-6.15153e-06	1.8496e-05	4.5696e-06	-5.35659e-06	-1.68452e-05	-8.03171e-07	-2.62046e-06	-2.60303e-06	7.40411e-07	3.15858e-06	-4.93631e-06	-9.73789e-06	-2.72754e-06	-4.9268e-06	4.07515e-06	-1.61677e-05	-1.38337e-05	5.92079e-08	1.90361e-06	-5.14194e-06	1.6024e-05	1.4236e-05	-6.50091e-06	4.72507e-06	-2.50836e-06	5.79226e-06	1.64574e-05	-5.24085e-08	-3.05152e-06	-5.51893e-06	-3.56681e-06	-8.03181e-06	4.53473e-06	6.54641e-06	-4.48541e-06	8.17435e-07	-1.14102e-05	3.89903e-06	5.50282e-06	-2.01927e-05	4.52971e-06	-1.49994e-05	1.3579e-05	1.51918e-05	1.26914e-05	7.2002e-06	9.94528e-06	-8.52097e-06	7.38293e-07
1.20107e-05	9.48182e-06	-2.21625e-06	1.07494e-05	-1.2558e-05	-9.13273e-06	-9.2957e-06	8.18629e-06	-7.54939e-06	1.41477e-05	-1.23331e-05	-1.74582e-05	-1.72768e-05	-4.41138e-06	-8.44245e-06	-6.02622e-07	2.53041e-06	-1.45387e-05	-4.75919e-06	8.30097e-07	-6.63691e-06	9.81434e-06	4.89429e-06	-8.52627e-06	1.20818e-05	6.40875e-06	4.20778e-06	6.6147e-06	1.38089e-05	2.06276e-06	-7.15817e-06	1.00777e-05	-5.62312e-06	1.19863e-05	6.49755e-06	-1.54731e-06	2.25234e-06	-1.83845e-06	1.0846e-05	1.19187e-06	1.35616e-05	1.10766e-05	1.88822e-06	4.08959e-06	9.3786e-06	1.18248e-05	3.39381e-06	2.36057e-06	5.62506e-06	3.16416e-06
7.34614e-06	1.30726e-05	-7.34569e-06	4.75971e-06	-4.133e-06	-9.68072e-06	-2.26563e-06	5.1647e-06	-6.27422e-06	1.68423e-05	-1.45692e-05	-1.04864e-05	-8.14328e-06	-7.20036e-06	-1.03249e-05	4.60428e-06	5.78202e-06	-7.4581e-06	-2.6787e-06	5.63586e-06	4.61793e-06	5.27475e-06	-5.0658e-06	1.98318e-07	1.40956e-05	5.51815e-06	1.12303e-05	9.5308e-07	1.71112e-05	1.93726e-06	-5.79511e-06	-1.6427e-06	2.29287e-06	1.2687e-06	1.5088e-05	6.73719e-06	6.99885e-06	3.99545e-06	1.59709e-05	-2.90055e-06	4.11136e-06	1.2094e-05	1.20653e-05	-5.10467e-06	9.5553e-06	4.52816e-06	-1.19728e-05	1.24825e-06	6.71519e-06	4.87457e-06
6.95968e-06	3.15948e-07	3.43536e-06	-2.72097e-06	9.81204e-06	-3.2009e-06	-1.67518e-06	2.24418e-06	3.54975e-06	8.54559e-06	-3.49337e-06	2.15341e-05	-1.76461e-05	1.64985e-05	6.92585e-06	-1.51478e-06	8.07005e-06	-4.15152e-06	3.24611e-06	-7.36371e-06	3.66336e-06	4.26107e-06	1.39498e-05	6.90263e-06	-3.38776e-06	7.37976e-06	4.11588e-06	9.96201e-07	1.04857e-05	-4.47884e-06	1.43845e-05	1.06862e-05	3.22625e-06	1.76729e-05	1.80193e-05	-4.89423e-07	1.844e-05	6.53187e-06	2.26301e-05	-1.91131e-06	-6.64571e-06	8.27622e-06	-8.29552e-07	-6.56805e-06	5.20887e-06	-1.18e-05	-2.13172e-07	-4.46205e-06	2.50964e-07	7.13714e-06
6.3015e-06	-8.3061e-06	-1.09012e-05	-2.22057e-05	3.3272e-06	-8.00672e-07	2.4988e-06	1.30051e-05	-7.65087e-06	6.2739e-06	-1.35691e-06	-1.06686e-05	-1.38762e-05	-7.24216e-06	6.84754e-06	1.37374e-05	-5.82445e-06	-9.7359e-06	-2.97689e-06	-9.14119e-06	7.16714e-06	6.23927e-06	6.24969e-06	1.87284e-06	1.4878e-05	5.15223e-06	3.31153e-06	6.96142e-06	6.57506e-06	5.10677e-06	-2.29205e-06	2.37382e-05	8.96531e-06	2.573e-06	-7.44154e-06	-7.99116e-06	2.26419e-06	5.85862e-06	1.06044e-05	6.28141e-07	1.80912e-05	-1.71935e-06	1.62544e-07	-2.48125e-06	1.8176e-06	6.66031e-06	-1.59533e-05	1.11174e-06	1.2948e-05	6.30417e-06
-3.37825e-06	-3.62348e-06	-6.32008e-06	1.46517e-08	-5.40098e-06	-9.57098e-06	6.38746e-06	1.26378e-05	-6.97702e-06	1.07098e-05	2.15843e-05	4.71989e-06	2.98542e-06	-3.84627e-06	1.45658e-05	7.61643e-06	-1.12143e-06	-3.97704e-06	-5.63457e-07	-3.16747e-06	8.34644e-06	-2.3169e-06	1.61586e-05	5.1951e-06	2.52378e-05	-3.28729e-07	7.87314e-06	-9.28137e-06	7.67716e-06	8.50907e-06	-1.00267e-05	9.15301e-06	4.79974e-06	6.49394e-06	-5.21391e-06	1.33007e-07	2.61813e-06	1.22305e-05	6.99515e-06	2.30709e-06	2.21676e-05	-3.70927e-06	6.22258e-06	-3.86289e-06	8.85891e-06	-1.24845e-05	-2.05501e-05	2.0942e-06	6.4091e-06	-2.76432e-06
1.09526e-05	7.06319e-07	2.04449e-06	-9.87943e-06	1.77806e-05	-1.91958e-06	3.5244e-06	5.44911e-06	-1.21181e-05	9.96031e-06	-2.83113e-06	-5.28628e-06	1.22857e-05	2.47304e-06	-5.38421e-06	1.2965e-06	1.23966e-05	6.80443e-06	-7.36874e-07	4.95771e-07	-1.62127e-06	-8.53501e-06	1.60486e-05	4.69856e-06	1.39829e-05	1.2406e-05	2.01183e-05	1.20416e-05	-8.78598e-06	1.08024e-05	6.78437e-06	1.2453e-05	-4.1361e-06	1.52698e-05	1.93332e-06	-1.59622e-05	1.58487e-05	8.69722e-06	8.99992e-06	5.84261e-06	2.32634e-05	1.28671e-05	-3.4147e-06	-6.4784e-06	2.10153e-05	1.57932e-05	-1.19216e-06	1.71436e-06	1.10564e-05	1.54293e-05
1.1553e-05	3.68918e-05	5.01692e-06	-1.08398e-05	3.49668e-06	-1.85914e-05	-7.97144e-06	-1.07407e-06	-3.93609e-06	-1.7917e-06	-1.56389e-05	1.48892e-06	-5.92148e-06	-3.34532e-07	8.11789e-06	-1.48056e-05	2.33514e-05	-8.79469e-06	1.25596e-05	6.9889e-06	-2.6892e-07	2.95398e-05	1.88605e-05	1.63935e-05	2.07722e-05	1.16598e-05	2.32242e-06	1.2535e-05	1.99557e-05	8.37468e-06	-2.74837e-06	2.01968e-05	2.11541e-06	1.06497e-05	4.98632e-07	7.69565e-06	1.34082e-05	9.7253e-06	2.18327e-07	3.21487e-06	1.77956e-05	-7.11083e-06	8.18334e-06	2.02553e-05	1.11766e-05	-2.98247e-06	8.55424e-07	1.02003e-05	8.28052e-06	1.55597e-05
-1.21535e-05	1.79644e-05	9.10796e-06	-3.53192e-06	-3.93228e-06	-9.27155e-06	7.84636e-06	-7.52961e-06	3.76414e-06	6.70179e-07	-2.40327e-05	-2.39555e-06	-3.54175e-06	1.13853e-05	5.32784e-07	-1.55105e-05	4.09193e-06	-5.65156e-06	-2.48549e-06	-4.23113e-06	4.71255e-06	2.93547e-06	3.15773e-06	8.11304e-06	8.35785e-06	1.54219e-05	-5.5785e-06	2.58689e-05	3.57698e-06	1.60036e-05	-1.5365e-05	1.50773e-05	9.76761e-06	2.33062e-07	1.73504e-05	8.62449e-06	1.07672e-05	1.57291e-05	-7.21893e-06	-1.34156e-05	1.92397e-05	1.62176e-05	1.42127e-05	1.05251e-05	-6.40637e-06	1.12586e-06	6.73779e-06	4.07346e-07	-5.15647e-06	1.13174e-05
1.48623e-05	1.36464e-05	1.40931e-07	2.3338e-06	-1.55161e-05	3.68163e-06	1.1522e-05	-1.10621e-05	-1.51751e-06	6.85048e-06	1.5625e-06	-1.18608e-06	-1.9467e-05	1.14717e-05	6.47836e-07	2.05937e-05	-1.04386e-05	9.21811e-07	4.4562e-06	3.78564e-06	1.30991e-05	-3.63842e-06	-3.42183e-06	1.80258e-05	-1.34796e-06	1.51641e-05	-4.3942e-07	6.86988e-07	2.3247e-05	3.27785e-05	2.05458e-05	6.28878e-07	-3.46572e-06	1.59843e-05	1.13207e-05	2.33968e-05	-4.47238e-06	2.13188e-05	3.0884e-06	3.31954e-06	8.1895e-06	9.72832e-06	1.36104e-05	1.10419e-05	6.02318e-06	7.00481e-06	2.80971e-05	-1.25494e-05	-8.74601e-07	1.13819e-05
-1.30092e-05	1.56909e-05	-3.28212e-06	-3.17431e-05	1.29042e-05	1.40332e-05	2.63637e-05	-1.6257e-05	6.56944e-06	-2.59868e-05	-6.56361e-06	-4.36981e-06	8.64604e-06	5.15e-06	-1.68205e-05	7.10283e-07	-3.45559e-06	1.40691e-06	1.12459e-05	2.7813e-07	-1.11484e-05	-1.08917e-05	9.0959e-06	2.34455e-05	1.9895e-05	9.29959e-07	1.57136e-05	1.43998e-05	1.62241e-05	-6.58248e-06	2.805e-05	1.83568e-05	2.21077e-06	8.11393e-06	8.92995e-06	2.71255e-05	2.40864e-05	-1.97482e-05	1.30756e-05	1.84623e-05	-1.03243e-05	1.75536e-05	1.09906e-05	6.02278e-06	1.48134e-06	-9.82041e-06	2.10492e-05	1.06525e-05	1.79602e-05	8.55433e-06
-2.76774e-06	1.94647e-05	4.79956e-06	-2.21984e-05	-2.334e-05	6.90311e-06	1.38097e-05	-1.73428e-05	-8.66863e-06	7.03797e-06	-6.20722e-06	2.64733e-06	3.95495e-06	6.73925e-06	-1.46349e-05	-9.56509e-06	4.57621e-06	4.02379e-06	-3.91933e-06	-1.85575e-05	-1.70662e-06	1.16172e-06	1.06943e-05	8.07266e-06	3.84947e-05	1.40682e-05	-5.80547e-06	2.9015e-05	6.96238e-06	1.13465e-06	4.7552e-06	9.25479e-06	3.13675e-05	1.83155e-05	6.07503e-06	3.6972e-07	2.15276e-05	5.64243e-08	5.39996e-06	-1.99089e-06	1.11552e-05	2.59634e-05	9.1073e-06	1.49278e-05	1.24099e-05	7.6955e-06	1.46868e-05	1.48736e-05	2.8586e-05	7.28241e-06
1.75621e-05	7.98774e-06	4.70957e-06	1.01431e-05	9.30688e-06	-2.09337e-05	-4.50971e-06	-6.71941e-07	-5.4762e-06	-4.83079e-06	1.08257e-05	2.57405e-06	7.44427e-06	3.13078e-06	-4.35909e-06	-4.07167e-06	3.46786e-07	8.16705e-06	1.76273e-05	1.25551e-05	4.29995e-06	1.17811e-05	2.63769e-05	1.21903e-05	1.19849e-05	-1.5294e-06	8.23836e-06	1.46008e-05	1.66011e-05	2.18842e-05	2.12701e-05	1.50752e-05	-5.80958e-06	2.07093e-05	5.57735e-06	1.47502e-05	5.73679e-06	-3.05239e-06	-9.06886e-06	7.37948e-06	1.54512e-06	9.63245e-06	2.76545e-05	-1.10945e-05	-9.23325e-06	1.60022e-05	1.14754e-05	1.91642e-05	2.6468e-05	7.95614e-06
3.52514e-06	5.51109e-06	1.7134e-05	1.19302e-05	7.21577e-06	-1.347e-05	-1.65752e-05	4.65167e-06	2.34188e-05	-2.19738e-06	1.41231e-05	8.03794e-06	7.57826e-06	-9.31171e-06	-8.49039e-06	4.06885e-06	1.68062e-05	3.24878e-06	2.81842e-06	1.71259e-05	3.25309e-06	1.91829e-05	-1.26653e-05	-4.47826e-07	3.58489e-05	-1.24512e-05	2.89239e-05	1.77323e-05	5.28916e-06	3.15591e-05	6.64692e-06	1.48768e-05	-8.9681e-06	3.05319e-05	1.38492e-05	2.93833e-06	1.04891e-05	-6.08112e-06	1.21315e-06	9.21074e-07	1.03994e-05	9.91904e-06	2.75505e-05	-6.5261e-06	1.02131e-05	9.08086e-06	9.71182e-06	-3.1386e-06	1.15e-05	1.3571e-05
-2.53061e-05	1.34703e-05	8.11829e-06	3.93212e-06	2.00704e-05	-1.91649e-06	1.06773e-05	-1.05296e-05	2.72517e-05	-7.69505e-06	1.01856e-06	-8.09536e-06	6.61521e-06	2.1531e-06	-1.41452e-05	2.89818e-06	7.36751e-06	-1.17903e-05	2.57146e-05	1.63492e-06	1.6238e-05	1.90397e-05	1.78089e-05	1.97412e-05	1.26181e-05	1.41621e-05	1.24853e-05	1.19084e-05	-1.06461e-05	1.01572e-05	-3.6146e-06	2.30204e-05	2.77484e-06	9.19453e-07	4.67732e-06	1.82186e-05	9.1155e-06	-2.12416e-05	6.98041e-06	9.40198e-06	1.61437e-05	1.27195e-05	-3.52433e-06	9.4094e-06	6.36329e-06	1.41345e-05	1.03097e-05	1.60347e-05	1.54012e-05	5.74455e-06
-5.0241e-06	-6.58172e-06	9.27727e-06	4.10548e-06	4.81215e-06	-1.22731e-05	2.24039e-06	-1.63284e-05	2.06874e-06	3.0325e-05	8.46163e-06	-2.55705e-05	6.80139e-06	-1.14103e-05	1.4583e-06	-8.3591e-06	1.23566e-05	-3.95317e-06	8.26537e-06	-1.46733e-05	5.09071e-06	3.37961e-06	9.88678e-06	7.43191e-06	2.01276e-05	1.8343e-06	1.20118e-05	2.88494e-06	-1.54148e-05	5.78899e-06	-3.9154e-06	-9.03242e-06	3.5588e-05	2.51368e-05	1.28841e-05	1.46688e-05	1.46789e-05	-5.1991e-06	2.23092e-05	2.02477e-05	1.48783e-05	2.2592e-05	-5.68301e-07	6.53986e-06	6.8228e-06	-6.52779e-06	-1.01434e-05	-8.83291e-06	-1.74961e-05	7.95654e-06
-1.13173e-05	-9.74145e-06	-1.85834e-05	-2.82469e-06	1.8828e-05	2.04633e-05	8.89125e-06	-1.07264e-05	1.51063e-05	-4.91197e-06	1.04216e-05	9.21882e-06	-1.50248e-05	2.26222e-06	7.57877e-06	1.42671e-06	-5.21523e-06	8.63979e-07	1.84911e-05	1.93673e-06	2.58258e-05	1.58554e-05	3.30458e-06	1.67465e-05	2.52654e-05	1.38276e-05	2.15067e-05	2.01174e-05	1.88757e-05	-1.44694e-05	-2.34095e-06	9.4108e-06	-7.56186e-06	2.95937e-05	-3.4833e-06	-1.07938e-05	2.06949e-05	6.59919e-06	1.53952e-05	2.03905e-05	3.51993e-05	7.54633e-06	1.00713e-05	1.37034e-05	9.73358e-06	1.42872e-05	-1.23738e-05	-1.09352e-05	8.25388e-06	-7.16133e-06
-4.77489e-06	-3.44357e-05	9.48549e-07	8.01041e-07	5.09279e-05	9.8671e-06	5.38603e-06	1.88233e-05	3.43966e-05	2.32589e-06	4.11203e-06	4.89986e-06	-1.84404e-05	-2.30355e-06	4.49582e-06	-1.38867e-05	1.42329e-05	-6.71421e-06	2.11879e-05	1.69851e-05	1.13988e-05	3.39745e-05	4.57516e-06	-2.33496e-05	1.42679e-05	-1.20968e-06	-2.82348e-06	-8.9816e-06	6.33419e-06	-5.99049e-06	3.07142e-06	2.17088e-05	4.59346e-06	-8.7967e-06	1.42488e-05	-7.19675e-06	-2.3308e-06	1.00006e-07	-2.68821e-06	1.08624e-06	2.70991e-05	6.61721e-06	3.87171e-06	1.23394e-05	-3.72396e-06	1.94172e-05	9.47564e-06	-1.57273e-05	-2.74742e-06	1.25531e-05
-4.60144e-06	1.85067e-06	1.54709e-05	-1.01118e-05	9.31048e-06	-8.56444e-06	3.48179e-06	-1.67714e-06	-4.35916e-06	2.02506e-05	7.39149e-06	1.15895e-05	-1.56955e-05	-3.42031e-06	3.52826e-06	2.15419e-05	-1.12838e-05	1.00975e-05	2.17843e-05	1.22529e-05	1.46647e-05	1.48028e-05	2.03455e-06	8.84897e-06	-6.82414e-07	-1.05631e-05	-8.7257e-06	1.49258e-05	1.00114e-06	1.88968e-05	4.87131e-06	1.81238e-05	6.85945e-06	1.42418e-05	-6.34206e-06	1.18668e-05	-9.02023e-06	-1.7484e-05	1.64094e-05	4.29314e-06	3.39618e-06	4.2341e-06	-5.00198e-06	5.35223e-06	6.51207e-06	-3.44333e-06	1.16384e-05	-5.70116e-06	6.94182e-06	2.12607e-05
-1.3149e-05	-6.10344e-06	3.48776e-05	-9.93959e-06	-1.00033e-05	5.5164e-06	-5.0872e-06	-2.53019e-05	1.47961e-05	2.82627e-05	6.00516e-06	1.68965e-05	4.42381e-06	-1.33918e-05	2.57345e-06	1.43759e-05	7.76632e-06	6.80906e-06	1.34466e-05	2.1979e-05	2.0697e-06	2.00252e-06	1.92951e-06	-6.05497e-06	1.54353e-05	1.15953e-05	-4.98399e-06	-1.72833e-05	3.43324e-05	1.78293e-05	4.08708e-06	4.81458e-06	7.74777e-06	-8.51945e-07	6.83065e-07	4.44628e-07	-7.38086e-06	-1.40631e-06	1.28332e-05	3.99222e-06	8.17437e-06	-3.60961e-06	8.57927e-06	-1.65723e-06	9.42228e-06	-2.16396e-05	7.47559e-06	-3.73962e-06	1.25227e-05	7.39175e-06
-1.59745e-05	8.94255e-06	4.18519e-05	-4.88714e-06	-1.67035e-05	-5.36179e-06	-4.73392e-06	-6.22466e-06	-1.18897e-07	1.74593e-05	-1.22017e-05	9.89226e-06	-9.24753e-06	-1.07002e-05	9.02344e-06	-1.23723e-05	-1.69071e-06	2.44492e-05	-2.55677e-05	2.10005e-05	-3.42708e-06	-1.4337e-05	1.62944e-05	8.51526e-06	9.06748e-06	1.51159e-05	1.05029e-05	4.64469e-06	2.21439e-05	1.85336e-05	1.72341e-05	3.64334e-06	2.62031e-06	-7.38162e-06	8.53573e-06	1.74996e-05	7.45522e-06	5.0204e-06	-1.71531e-06	3.92138e-06	2.15193e-05	1.38798e-05	8.09783e-06	-1.39443e-06	3.77618e-06	2.4538e-05	8.73523e-06	1.25483e-05	1.08663e-05	-2.15375e-06
4.93666e-06	1.33357e-05	2.12566e-05	6.09933e-08	-1.6771e-05	-5.10667e-06	1.70837e-06	-1.4397e-05	-1.92925e-06	1.58654e-05	-1.51015e-05	2.43738e-05	-4.52669e-06	5.37867e-06	1.60633e-06	6.68456e-06	-1.09503e-05	-2.60912e-05	-1.15853e-05	2.72984e-05	3.01992e-06	1.27489e-05	2.66221e-05	1.44004e-05	1.41464e-05	1.39238e-05	3.44095e-05	5.77833e-06	4.20236e-06	8.82506e-06	-7.12274e-06	-1.33196e-05	-2.84268e-06	4.66648e-06	-3.88812e-07	1.91182e-05	2.57165e-05	2.35529e-05	2.01416e-06	-8.28585e-06	2.06131e-06	5.9365e-06	8.57411e-06	5.50778e-06	-1.13556e-05	2.30699e-05	3.90735e-06	-2.31562e-06	3.51728e-06	-2.08929e-06
8.14924e-06	4.0099e-06	2.47518e-05	6.85021e-07	-1.10339e-05	-1.61138e-05	1.26713e-06	-3.40781e-06	-3.94144e-06	-1.8567e-06	-8.43827e-06	-8.89517e-06	8.75047e-07	-1.35219e-06	1.51603e-06	3.16647e-05	-5.24029e-06	-1.00245e-05	6.28571e-06	1.53298e-05	7.32416e-06	1.57995e-05	9.27968e-06	-1.33589e-06	8.73167e-06	6.12075e-06	2.0814e-05	2.23479e-06	-5.42709e-06	9.33192e-07	-2.00897e-06	4.10467e-06	2.03135e-05	1.17095e-05	8.95787e-06	9.63495e-06	1.94304e-05	1.02945e-05	1.21013e-05	-1.09452e-05	-1.2867e-06	1.33524e-05	4.25467e-06	-5.36451e-07	-1.23332e-07	-4.07168e-06	3.86731e-06	-8.07426e-06	1.58772e-05	-1.96997e-05
-1.11742e-05	2.12541e-05	1.83215e-05	-1.274e-05	-6.7708e-06	3.38219e-06	9.34339e-06	-1.0873e-05	-9.77681e-06	-1.28709e-05	-8.57571e-06	-2.11962e-05	-8.49816e-06	-2.17382e-05	5.55389e-06	3.50125e-05	9.07065e-06	4.70084e-06	-6.96903e-06	1.1192e-05	1.47366e-05	-1.72271e-06	3.22915e-06	-1.34631e-05	2.77092e-05	-6.74477e-06	2.54106e-05	-1.33309e-06	-1.97412e-05	1.41587e-05	1.19642e-05	-1.44422e-06	1.06026e-05	1.09455e-05	-8.74088e-06	1.91838e-05	7.35808e-06	7.87261e-06	-5.13659e-06	2.22085e-06	-6.61391e-06	1.42993e-05	2.39931e-06	2.46967e-05	5.31977e-06	-1.79178e-06	-9.32535e-06	4.21379e-06	1.00217e-05	1.57992e-06
3.75015e-05	1.30549e-05	-7.45377e-06	1.51642e-05	-9.04949e-06	7.58172e-06	4.10044e-07	-1.66412e-06	-6.99503e-08	-1.62842e-05	-5.35585e-06	-2.59753e-05	1.20223e-05	-2.11668e-05	1.26888e-05	3.46984e-05	4.41336e-07	-4.94492e-06	4.91883e-06	2.85e-05	1.2915e-05	2.70423e-06	-1.5958e-05	4.70422e-06	1.27308e-05	-1.53772e-06	2.1629e-05	-4.89618e-06	-8.64243e-06	1.79469e-05	-7.3107e-06	-2.36209e-06	6.17757e-06	8.75829e-06	-1.02371e-05	2.05233e-05	4.00527e-06	4.77062e-07	3.60823e-06	-1.36334e-06	8.62766e-07	-4.33703e-06	-1.94554e-07	1.98152e-05	-1.14982e-06	2.2122e-06	-9.01427e-06	3.90762e-06	-4.05544e-06	5.40118e-06
1.43456e-05	1.77141e-05	-2.54695e-05	5.20808e-06	-2.02295e-05	-7.52824e-06	6.11602e-06	-3.40742e-06	-3.44201e-07	-1.87531e-05	3.04435e-06	-1.29115e-05	1.11157e-05	-2.51852e-06	-1.51479e-06	-3.03406e-06	-3.76223e-06	-2.09809e-06	6.95194e-06	3.61919e-06	1.04923e-05	1.43114e-05	1.2278e-05	2.48681e-05	-1.20294e-05	7.71354e-06	2.54552e-05	-4.72012e-06	-1.25828e-06	-1.76271e-05	9.54473e-06	1.33804e-05	3.97448e-07	-6.03049e-06	2.6278e-05	1.49349e-05	4.7146e-06	-4.17874e-06	-1.11119e-05	1.00612e-05	-2.09301e-08	1.84318e-05	-1.70755e-05	8.31447e-06	2.81301e-06	3.05762e-05	-6.81324e-06	3.08867e-05	1.59107e-05	-1.11345e-05
-7.18685e-06	2.51887e-05	2.60798e-06	1.22068e-05	-9.88893e-07	3.8725e-08	5.61391e-06	-4.36116e-06	-5.46634e-06	-4.93837e-06	1.2623e-05	6.85791e-06	3.74436e-06	2.38252e-06	-5.73781e-06	-2.26509e-05	-6.8275e-06	-1.14708e-06	-4.25856e-06	2.01333e-05	-3.43125e-06	3.6724e-06	3.30665e-06	1.15907e-06	-5.16732e-06	1.17018e-05	7.93673e-06	2.23084e-06	7.12847e-06	2.47354e-05	1.74373e-05	1.39519e-09	6.5104e-06	1.03182e-05	2.07972e-05	9.91494e-06	1.06853e-05	-1.22918e-05	1.59527e-05	-5.11098e-06	1.6766e-06	-1.38467e-07	-6.18646e-06	2.29295e-05	9.02967e-06	1.17748e-05	1.27092e-05	2.5962e-05	1.50234e-05	-9.50545e-06
-1.72613e-06	-8.77284e-06	1.08601e-05	1.16812e-06	1.00041e-05	-1.08131e-05	-1.46694e-05	2.21329e-05	-4.98124e-06	-5.07104e-06	2.50345e-05	-4.8858e-06	4.9823e-06	5.16724e-06	-1.98211e-06	-1.76601e-05	-2.21606e-06	-1.62265e-05	2.85302e-06	-3.40117e-06	-3.4441e-07	-3.108e-06	7.62828e-06	-6.31307e-06	6.36706e-06	-1.14789e-06	1.00469e-05	-5.81003e-06	-3.76727e-06	1.81249e-05	-2.36164e-05	-2.62186e-06	-1.89441e-06	9.64467e-06	2.05331e-05	-1.05919e-05	-6.08672e-06	-2.74979e-06	-5.62101e-06	-8.16259e-06	-1.3577e-05	1.19849e-05	5.87548e-06	-2.43516e-06	6.58731e-06	8.5184e-06	1.22373e-05	-8.23091e-07	5.01357e-06	6.81919e-06
-1.47061e-05	3.02859e-05	1.68168e-05	1.79348e-05	-7.82946e-06	3.04078e-06	-2.30773e-05	-6.37393e-06	-2.12311e-06	-7.62491e-06	1.15853e-05	1.30598e-05	6.3175e-06	8.70115e-06	1.73775e-05	7.54068e-06	1.49544e-06	6.06003e-06	-1.95663e-06	8.65391e-06	-1.54081e-05	-6.01523e-06	2.2763e-05	2.17794e-06	1.92368e-06	9.98899e-06	8.6897e-06	-1.07496e-05	1.33765e-05	1.05827e-05	-9.99589e-06	-5.41439e-06	-8.49314e-06	3.53647e-05	9.37484e-06	6.20486e-07	1.12959e-05	-7.08078e-06	-1.9261e-06	6.43051e-06	2.79566e-06	2.45857e-05	-5.60381e-06	-9.70275e-06	4.07339e-06	-1.22256e-07	5.25154e-06	2.13928e-06	-5.17111e-06	5.09047e-06
3.21984e-05	7.23984e-06	1.94301e-05	2.45165e-05	-4.84018e-06	-1.56517e-06	1.3263e-05	9.45423e-06	-8.75436e-07	8.68013e-06	1.09349e-05	2.78715e-06	2.58949e-06	5.82474e-07	-4.82154e-06	1.54502e-05	1.16438e-05	1.02386e-05	-1.10946e-06	6.07396e-06	-9.96271e-07	1.62501e-05	1.79207e-06	-2.39201e-06	7.89576e-06	-5.78767e-06	9.80666e-06	-9.28716e-06	2.54461e-05	1.60905e-06	-4.8567e-06	1.05638e-06	-3.41796e-07	1.1248e-05	-2.98173e-07	1.13937e-05	2.38989e-05	-1.76413e-05	1.37067e-05	4.28387e-06	-1.20149e-05	1.09386e-05	-2.81413e-06	-8.6854e-06	-2.6338e-06	-1.68752e-06	1.27707e-05	-1.15373e-05	-1.2525e-05	1.46884e-05
-5.17353e-07	4.13542e-06	1.10634e-05	1.48129e-05	-9.28713e-06	-2.40369e-05	1.09587e-05	1.33883e-05	2.29589e-06	7.57921e-06	-1.37493e-06	-1.26938e-05	1.33258e-06	-7.82621e-06	1.79559e-05	7.91496e-06	1.19573e-05	-1.17452e-05	-2.25035e-05	-8.88668e-06	1.21623e-05	-5.86066e-06	5.49458e-06	6.27854e-07	6.96756e-06	1.20013e-05	2.94899e-06	5.24778e-07	1.64435e-05	5.594e-06	-4.14861e-06	1.82045e-05	9.62516e-07	-4.91337e-06	5.12535e-06	7.35051e-06	2.79702e-06	-6.93236e-06	1.07117e-05	1.03326e-05	8.36762e-06	1.586e-05	1.29432e-06	-2.14177e-06	3.1333e-05	3.63147e-07	-9.75826e-06	-1.57924e-05	3.21533e-06	1.9169e-05
2.06692e-06	7.05859e-06	1.16193e-05	2.64045e-05	3.61004e-06	-1.07507e-05	-4.97558e-07	9.6646e-06	3.09735e-06	3.13698e-06	1.01673e-05	4.97897e-06	5.64946e-07	-6.44471e-06	-2.75819e-07	2.06422e-05	1.68388e-06	-1.35303e-05	-1.22105e-05	1.00021e-05	1.61803e-05	-1.02346e-05	2.36872e-05	1.49581e-06	-4.45584e-06	3.97032e-06	-1.43212e-05	-3.17797e-06	1.22793e-05	1.60031e-05	-6.30119e-06	6.31651e-06	-1.56559e-05	-3.17526e-06	-8.88823e-06	3.49172e-06	-3.00128e-06	-2.56794e-05	-1.16059e-05	9.13289e-06	1.18963e-05	7.2735e-06	1.20008e-05	-3.60659e-06	9.39352e-06	7.07526e-07	4.01842e-06	-1.33264e-05	-1.2346e-05	6.3521e-07
1.70703e-05	9.87597e-06	8.17957e-06	4.34731e-07	-1.46116e-06	-8.39883e-07	-1.64072e-05	4.49512e-06	1.20007e-05	-8.4795e-06	9.54098e-06	1.13945e-05	1.0968e-05	-4.22109e-06	9.05529e-07	4.68531e-07	7.79673e-06	1.33663e-06	1.15113e-05	2.67171e-05	-2.48055e-06	4.91236e-07	1.49771e-05	1.23202e-05	4.52251e-06	1.06759e-05	-5.76122e-06	1.07262e-05	-2.54981e-06	1.17985e-05	1.10805e-05	1.08525e-05	1.08467e-05	-1.35633e-05	-7.00817e-06	1.20964e-05	-5.89021e-06	-8.98966e-06	3.41411e-06	5.97337e-06	4.00886e-06	-1.72648e-05	7.945e-06	-1.38763e-05	1.09677e-05	-7.33113e-06	1.96912e-05	-3.82239e-06	2.28063e-05	5.70482e-06
6.98117e-06	1.17434e-05	2.62374e-05	1.68967e-05	-1.72721e-06	-2.82242e-05	1.24884e-05	3.86102e-06	-1.21628e-05	8.20575e-06	-1.43481e-06	6.1202e-06	6.38189e-06	-1.74003e-05	-3.53322e-06	1.03921e-05	9.98096e-06	-3.53482e-06	2.91588e-05	4.65027e-06	-8.88198e-06	-5.9457e-06	-4.21752e-06	2.31301e-06	-2.70665e-06	-2.74455e-06	6.1267e-07	-8.17875e-06	4.01151e-06	-5.77408e-06	1.53619e-05	-9.55792e-06	8.27114e-07	-1.06467e-05	-1.03286e-05	1.40187e-05	1.66917e-05	-1.04509e-05	-1.00552e-06	-5.56989e-06	2.17814e-05	5.22672e-07	1.39953e-05	1.17965e-05	5.61334e-06	-4.57453e-06	3.69858e-06	1.21368e-05	9.63591e-06	5.65924e-06
9.30041e-06	7.0828e-06	6.16866e-06	2.10194e-05	8.72834e-06	-3.3924e-05	4.47708e-06	-2.02981e-05	-5.18914e-06	-2.92869e-06	1.24425e-06	1.01167e-05	-1.19199e-05	-2.49743e-06	-1.34591e-06	1.23399e-05	-1.15935e-06	-1.28048e-06	1.34142e-05	7.4848e-06	-2.10033e-06	-1.92703e-05	-9.88132e-06	-4.46582e-07	-1.50354e-05	1.73809e-06	3.28221e-06	3.77007e-06	3.33614e-06	1.03988e-05	1.67481e-05	-2.04531e-05	-1.20834e-05	1.12913e-05	-6.32503e-06	8.61685e-07	9.60788e-07	-3.88225e-06	2.42339e-06	1.85657e-06	4.96086e-06	-2.22017e-06	-1.05538e-05	-1.01167e-05	4.74235e-06	-6.83153e-06	1.26636e-07	1.38263e-05	6.66304e-07	-5.97236e-06
-5.49473e-06	5.16855e-05	9.54623e-06	-3.85489e-07	1.89027e-05	-6.81569e-06	1.11456e-05	-8.03033e-06	9.81517e-06	8.44912e-06	-1.64671e-06	-2.03349e-05	-1.91312e-06	-2.45538e-05	-1.00032e-05	-4.51174e-06	-4.91896e-06	1.63154e-05	1.8012e-05	3.37986e-05	-6.45491e-06	-1.61137e-05	1.90896e-05	1.96535e-06	2.53574e-06	-1.28548e-05	-5.8779e-07	-2.9273e-06	4.55925e-06	-1.25527e-06	-7.34524e-07	-3.10901e-05	4.30125e-06	-7.69793e-06	-9.67716e-06	-5.49767e-06	7.5315e-06	3.05953e-06	1.56367e-05	-4.7316e-06	1.52742e-06	3.60801e-05	2.92124e-07	-1.09709e-05	1.76736e-05	1.04685e-05	-3.73498e-06	-8.03296e-06	1.78059e-05	5.13022e-06
-1.02258e-05	2.34145e-05	1.85215e-05	-1.56637e-05	-1.47299e-05	1.26992e-05	1.83938e-05	1.23827e-05	5.91195e-06	7.05766e-06	-5.31644e-06	-1.45273e-05	1.09931e-05	4.42443e-06	1.7015e-05	2.73793e-06	-5.35459e-06	-5.71821e-06	-3.40263e-06	-2.10803e-05	1.70423e-06	-7.28214e-06	1.76841e-05	2.13672e-06	-6.44178e-06	1.30864e-05	8.55725e-07	-1.17322e-05	-5.10169e-06	2.47609e-06	-2.82925e-06	-1.7716e-05	6.91689e-06	-2.24175e-06	-4.38244e-06	-1.30036e-05	6.08119e-06	-2.37949e-05	8.49447e-06	-1.55451e-05	-1.93655e-05	1.0609e-05	5.95242e-07	-4.46855e-06	-3.40846e-06	-4.51088e-06	-9.73377e-06	-1.3412e-05	3.81995e-06	9.58388e-06
-1.8999e-05	1.0019e-05	3.03763e-06	3.52743e-06	7.46182e-06	5.57375e-06	-1.44516e-05	-5.72003e-06	-3.08181e-06	1.59583e-05	4.08271e-07	7.9534e-06	-8.19869e-06	-1.14545e-05	4.58783e-06	6.01577e-06	3.65934e-06	2.03294e-05	3.6118e-06	3.22704e-06	-8.20894e-06	-1.03012e-05	-1.03032e-05	-1.85444e-06	-8.43796e-06	-1.78427e-05	-8.41621e-06	-3.7503e-06	-1.6403e-05	1.25027e-05	-1.32747e-05	-1.56524e-05	-6.62085e-06	-1.69099e-05	1.48516e-08	-5.10064e-06	-4.93922e-07	-2.8326e-06	-1.14671e-05	-2.29135e-05	-9.65446e-06	6.63863e-06	-1.43993e-05	-7.11048e-06	4.11116e-06	1.35188e-06	-6.01163e-07	1.55359e-05	-7.44295e-06	1.0399e-05
3.10037e-05	3.21362e-05	-3.07067e-06	-1.27696e-05	-3.48671e-05	1.18495e-06	-2.27537e-05	-1.96963e-05	-2.28887e-05	-1.55208e-05	4.69723e-06	-2.01704e-05	6.26289e-06	6.62194e-06	-1.39163e-06	-1.57794e-05	1.85346e-05	-1.10163e-05	-1.29625e-05	-2.35407e-05	5.55229e-06	-1.71785e-07	-6.42923e-06	-2.5687e-06	1.15937e-05	-1.67227e-05	-2.77553e-05	-2.72278e-05	-8.89415e-06	4.98444e-06	-6.15993e-06	-4.23625e-06	-3.01115e-05	-1.5046e-05	-5.37256e-06	1.05319e-05	4.81539e-06	-3.34217e-05	1.02132e-05	-1.63958e-05	1.14485e-05	-5.49754e-06	-4.84364e-06	-2.85773e-06	1.34161e-05	-1.52823e-06	7.51886e-06	-2.42865e-05	-7.4572e-06	-7.08935e-06
2.42996e-06	-2.95078e-06	-3.47807e-06	1.19431e-05	-4.62247e-05	2.61257e-06	-5.50531e-06	-1.57186e-05	3.2473e-06	3.23108e-07	-1.6832e-06	6.17869e-06	-7.07248e-06	7.21909e-06	-1.51907e-05	-7.33044e-06	3.0417e-06	-8.74395e-06	-1.43285e-05	-2.20041e-05	-9.96168e-06	-8.23805e-06	-3.2896e-06	7.39816e-06	-2.43938e-05	6.33645e-06	5.21011e-06	-1.02934e-05	1.63968e-06	-1.41393e-05	-4.01599e-06	-1.60076e-05	-1.37066e-05	2.53144e-06	-1.96828e-07	-1.61568e-05	8.73924e-06	-8.85899e-06	1.6078e-05	-2.67276e-05	-3.6606e-05	1.81582e-05	1.90329e-05	-6.3031e-06	-8.06018e-08	-4.72301e-06	-1.26349e-05	-3.9096e-05	8.74469e-06	-5.11446e-06
-4.92886e-06	1.85464e-05	-8.13291e-06	1.19677e-05	-2.41462e-05	7.80939e-06	6.10624e-06	4.2896e-06	1.77128e-05	6.0498e-06	-1.07495e-05	-7.79324e-06	-5.98979e-06	1.73715e-05	-6.74127e-06	1.97231e-06	1.25833e-05	-5.2896e-07	-2.9533e-06	6.22707e-06	-4.46472e-06	-2.49119e-06	4.46844e-06	-2.18451e-06	-7.09124e-06	-2.00376e-05	7.30204e-06	1.56011e-07	5.28058e-06	1.1526e-05	1.25988e-05	-1.61262e-05	5.2154e-06	-1.10223e-05	-2.38549e-05	-1.08723e-05	-8.6975e-06	-3.8435e-06	-1.48851e-05	-1.9476e-06	-1.30287e-05	9.07154e-06	-2.96945e-06	-1.75457e-05	-6.07257e-06	2.2904e-05	1.66667e-05	1.51431e-05	4.95236e-06	1.47772e-05
4.19832e-06	-6.71942e-06	1.06916e-05	-9.6322e-06	1.31089e-05	-1.96309e-05	-8.10836e-07	3.00524e-05	-8.81935e-06	1.50598e-05	-2.04348e-05	1.13375e-05	-1.14243e-05	-1.91894e-06	1.25788e-05	1.96823e-06	-6.94309e-08	1.58661e-06	-2.48634e-05	4.45155e-06	3.14937e-06	3.31125e-05	2.70427e-06	1.25702e-05	1.46635e-05	-7.17814e-06	-1.98989e-05	1.98373e-06	-3.60857e-05	4.60041e-06	2.18674e-05	-1.03297e-05	-2.42407e-05	-9.83474e-06	3.3867e-06	1.43113e-05	-2.0517e-05	-2.30611e-06	-7.06385e-06	-6.3318e-06	3.82137e-06	3.75168e-05	-1.01699e-05	-1.8988e-05	-3.87122e-07	-7.97904e-06	-4.32932e-06	1.88967e-05	2.31955e-05	1.8705e-05
-1.27772e-05	3.45763e-06	-2.06171e-05	5.46847e-06	1.25088e-05	-2.57066e-05	7.82049e-06	2.22944e-06	1.74473e-05	-9.19564e-06	-2.03651e-06	2.04205e-06	-5.10739e-06	-1.59954e-05	4.28022e-06	1.04049e-05	-2.79255e-06	-1.74116e-05	6.55238e-06	6.3027e-06	-7.76724e-06	1.60318e-05	-2.74259e-05	-1.62026e-05	3.03925e-06	-8.36274e-06	-4.5368e-07	-2.29827e-05	-2.23948e-05	-2.36843e-06	3.52191e-06	-3.28424e-05	1.72228e-06	5.82e-06	-5.49786e-07	-2.04511e-06	1.07079e-05	-1.16298e-06	-6.71592e-06	-1.92024e-05	-1.54041e-05	1.38696e-05	-2.1697e-05	-4.40463e-06	5.1209e-07	-1.08173e-05	-1.64672e-05	2.03723e-05	3.79404e-06	-1.26648e-05
2.4375e-05	-1.1061e-05	6.22104e-06	6.16098e-06	5.87562e-06	2.97043e-06	-5.4881e-06	1.08007e-05	1.25894e-05	-1.71871e-05	-1.26687e-05	3.85339e-06	-1.12815e-05	-1.66483e-05	1.22636e-05	7.82399e-06	-3.23716e-06	-1.39687e-05	-3.1073e-05	-4.42979e-06	-4.3001e-06	-1.20733e-05	6.97375e-06	-2.45168e-05	-7.39015e-06	1.11748e-05	-2.87531e-05	-1.67722e-05	-2.14278e-05	1.71809e-05	4.66771e-06	2.27905e-06	1.18826e-05	-3.04147e-06	2.56262e-06	-4.94107e-06	6.31645e-06	-1.2759e-05	1.51156e-05	-7.87026e-06	-2.44714e-06	4.91549e-07	-1.20035e-05	-1.24635e-05	2.71305e-05	-1.48841e-05	-1.73664e-07	-1.39376e-06	-1.85724e-05	-1.88033e-05
3.02495e-06	1.06907e-05	1.79213e-05	1.44761e-05	-2.33372e-05	-1.08928e-05	-7.08116e-06	1.6502e-05	1.12033e-05	-2.80065e-05	1.70126e-05	1.97132e-06	4.7696e-06	-2.80654e-05	7.67784e-06	1.84967e-05	4.02627e-07	-5.82643e-06	4.48588e-06	-3.39839e-05	-1.74881e-05	-3.04413e-05	-1.20898e-06	-1.10876e-05	2.27013e-05	1.60449e-05	1.23472e-06	5.79209e-06	-7.52225e-06	2.37583e-06	-1.6027e-05	2.35467e-05	-9.75087e-06	-1.3479e-05	6.21677e-06	-1.71509e-05	1.48422e-06	-9.7512e-06	1.23587e-05	-5.30052e-06	7.29385e-06	-1.15633e-05	-9.37514e-06	-2.02425e-05	3.30378e-06	-1.19189e-05	-5.31503e-07	-4.22813e-06	1.08769e-05	-2.64709e-05
5.34679e-10	2.89225e-05	1.47122e-05	-3.94329e-06	-7.79833e-06	-8.33947e-06	1.00918e-05	-1.72021e-06	5.99528e-07	-2.06491e-05	2.01392e-05	-1.49258e-05	1.02727e-05	-1.96223e-05	-1.29615e-05	-6.44253e-06	2.47176e-06	-1.95844e-06	-1.27492e-05	-2.07424e-05	-1.38216e-05	1.07618e-05	-7.00743e-06	2.51671e-06	6.60255e-06	-1.78413e-05	-7.92476e-06	-3.78028e-06	-1.08469e-05	5.37106e-06	-2.53902e-05	-4.06113e-08	-1.22258e-05	8.72675e-07	-1.58133e-05	-1.907e-05	2.25475e-05	1.882e-05	-1.14871e-05	4.68751e-06	-2.017e-05	3.25749e-06	-9.49233e-06	-2.21256e-05	-1.46053e-05	-1.30883e-06	-6.18521e-06	9.53244e-06	6.0008e-07	-7.11867e-06
1.51661e-05	3.44238e-05	4.30023e-05	-1.11699e-05	2.76449e-05	1.8972e-05	-1.22327e-05	-1.0283e-05	1.52984e-06	-6.66474e-06	1.48782e-05	-2.43294e-05	-8.4029e-06	-8.05204e-07	-5.15588e-07	-2.46305e-05	-1.63016e-05	-1.61961e-05	-6.99734e-06	5.34053e-06	6.47368e-06	2.26829e-05	-1.00085e-05	3.71632e-05	1.61208e-06	-1.06994e-05	-4.53698e-06	1.55484e-06	1.97727e-06	-1.06501e-05	-2.3099e-05	-9.63821e-06	-1.17095e-05	2.18895e-05	-8.93354e-06	-8.14943e-06	2.27599e-05	-6.30992e-07	-2.00807e-05	3.22954e-06	1.2181e-05	2.78367e-05	-1.0592e-05	-2.1499e-05	-3.04571e-06	-3.12699e-06	-3.8792e-06	1.73559e-05	-1.39415e-05	7.40344e-06
2.38657e-05	2.83235e-05	3.12177e-05	-1.23228e-05	-9.2136e-06	-1.96314e-05	-2.82897e-05	-2.57022e-05	2.67491e-06	4.93498e-06	-1.17624e-05	-4.86119e-06	-2.46262e-05	1.3045e-06	5.87276e-06	1.59723e-05	1.2656e-05	-2.85137e-05	5.85214e-06	2.10874e-05	-3.01264e-06	2.48768e-05	3.80566e-06	4.00801e-06	1.33584e-05	-9.01436e-06	5.19875e-06	8.78645e-07	-6.48053e-06	-6.69807e-06	-1.05291e-05	2.20017e-06	-1.69812e-05	4.57798e-06	-7.93734e-06	-8.55131e-06	1.17875e-05	-1.38592e-05	7.45743e-06	1.13325e-05	1.61019e-05	6.42093e-06	6.30815e-06	-4.44299e-05	-1.43273e-05	1.5848e-06	-1.99931e-06	1.674e-05	9.35289e-06	3.45613e-05
1.26087e-05	8.49885e-06	1.75646e-05	1.33224e-05	-2.31332e-05	-1.98143e-05	-1.04797e-05	7.34745e-06	7.38814e-06	-6.70283e-06	-7.42424e-06	-1.07967e-05	-1.36818e-06	9.38306e-06	-8.25869e-06	-1.0068e-06	1.27425e-05	-9.41571e-06	-3.39993e-06	8.37591e-06	-1.38236e-05	-1.08006e-05	-8.48859e-06	4.11634e-06	-8.78466e-06	-1.41723e-06	2.37695e-05	-5.06801e-06	-1.26524e-06	2.06851e-05	-3.2649e-05	-5.25502e-06	-2.72948e-05	2.01517e-05	1.93009e-06	1.45344e-05	-5.85575e-06	-1.65414e-05	2.41773e-06	-1.54237e-05	-9.01942e-06	8.56228e-07	-7.65942e-06	-2.61421e-05	-1.24433e-05	-1.18869e-05	8.52762e-06	-1.97551e-05	1.05799e-05	1.70073e-05
-1.26777e-05	6.73918e-06	1.07377e-05	-1.62935e-06	-3.42995e-05	-7.38135e-06	-7.55936e-06	-1.2891e-05	7.03115e-07	-1.87552e-05	6.81609e-06	-2.07588e-05	-2.73124e-06	-2.09748e-06	5.56068e-07	-2.77752e-06	8.50433e-06	-3.82718e-05	4.25257e-06	1.50403e-06	-3.5219e-05	8.16019e-06	5.2602e-06	-1.83256e-05	-8.84162e-06	1.40031e-06	-8.24556e-06	-1.80414e-05	3.6222e-07	1.43179e-05	-6.59822e-06	-2.73347e-06	5.08205e-06	6.07962e-06	-8.4684e-06	-7.16374e-06	-2.55242e-06	1.08732e-05	2.5361e-06	2.19914e-07	-1.49488e-05	-7.23407e-06	1.17768e-05	-6.75812e-06	-1.3128e-06	9.01792e-06	2.52962e-06	4.46101e-07	-1.16216e-05	5.46598e-06
-9.55773e-06	-1.41958e-05	4.68542e-06	-3.42128e-05	-9.36697e-06	-1.51669e-05	-1.60028e-06	1.84724e-06	-1.70808e-05	6.71294e-06	6.24458e-06	-4.97544e-06	-2.62204e-05	8.06859e-07	1.23523e-05	1.43264e-05	1.16595e-05	-1.20012e-05	-1.5493e-05	3.22512e-06	2.257e-05	-5.26397e-06	-2.16506e-05	-4.49556e-06	-1.50623e-06	2.48008e-05	-1.68149e-06	-4.35537e-06	1.06864e-05	-4.89886e-06	-1.58652e-05	1.3655e-06	9.16187e-06	5.2871e-06	-3.81219e-07	-1.14846e-06	1.2017e-05	-4.57749e-06	1.04248e-05	4.72396e-06	8.90723e-06	1.35466e-05	6.23797e-06	1.99416e-05	-7.95124e-06	-7.20223e-06	-1.48775e-05	-1.45515e-05	-1.41139e-05	-8.51553e-07
8.17982e-07	1.20746e-05	1.83357e-05	-1.6117e-05	-2.09467e-05	-2.43977e-05	8.58954e-06	-7.67819e-06	-1.41168e-05	1.07863e-05	-7.82793e-06	2.17899e-06	1.40963e-05	-5.91745e-06	3.44462e-05	-1.1305e-05	1.16865e-05	-2.2288e-05	-1.68559e-05	-4.95589e-06	-1.38254e-05	-6.12215e-06	-7.32608e-06	-8.01273e-07	1.00879e-05	-1.59267e-05	9.9088e-06	-6.99144e-07	1.56382e-05	1.71159e-05	-8.90835e-06	-1.60314e-05	-7.51694e-06	9.3144e-07	-8.12286e-06	-2.82722e-06	1.11027e-05	-1.02909e-05	-1.52898e-06	-2.20888e-05	2.16327e-05	1.75791e-05	-4.92884e-06	1.36481e-05	8.95053e-06	2.38516e-05	-1.7886e-05	1.98859e-06	7.24923e-06	2.23702e-05
1.74793e-05	1.93766e-05	7.0602e-06	-7.95268e-06	3.05815e-06	-3.53638e-05	-5.25272e-06	-6.39148e-06	-1.12921e-05	4.98647e-06	7.55575e-06	9.60278e-06	-2.05263e-06	5.31703e-06	-1.03571e-05	1.34533e-05	-5.72946e-06	-5.21265e-06	-1.03077e-05	7.73132e-06	1.86549e-07	8.41439e-06	-2.79128e-06	-3.0533e-06	2.38666e-05	-4.68297e-06	-2.76394e-05	-1.4578e-06	1.34361e-05	1.89764e-05	-2.02056e-06	-8.71719e-06	-3.02729e-05	6.60515e-06	3.98351e-06	3.59627e-06	-1.8102e-06	-1.1796e-05	2.63575e-05	-7.313e-06	4.31995e-06	-6.03738e-06	-3.13603e-05	-1.15952e-05	-1.05178e-05	1.47012e-05	1.63982e-05	2.22555e-07	1.55298e-05	-4.16749e-06
1.68641e-05	2.42657e-05	7.68858e-06	6.55638e-06	2.33383e-05	-1.90805e-05	-2.86171e-06	-1.91929e-05	2.96891e-06	1.1749e-05	-3.30361e-06	5.81518e-06	3.60352e-06	5.03761e-06	-1.28226e-05	3.50245e-06	1.8274e-05	-1.50796e-05	-9.37341e-06	1.05063e-06	1.49369e-05	1.12546e-05	-4.81333e-06	-1.95511e-05	-5.89013e-06	-4.3787e-06	1.23704e-05	-2.38299e-05	4.71905e-06	-4.05145e-06	2.31529e-05	-9.51479e-06	-3.17498e-05	-1.03824e-05	-1.88269e-06	-1.30185e-06	1.39169e-05	-4.28342e-06	1.24542e-05	1.15432e-05	-9.19002e-06	6.50094e-06	-1.25386e-06	-1.19532e-06	-2.1306e-06	3.59937e-06	3.47903e-06	7.81697e-06	-9.45053e-06	1.51722e-05
1.32027e-05	4.84682e-05	1.16231e-05	2.07706e-05	-1.3284e-05	-1.56174e-05	-2.64346e-06	-1.06173e-05	3.10257e-05	2.9934e-05	-4.96506e-06	-6.53482e-07	-2.28082e-05	4.25301e-06	5.90032e-06	2.14956e-06	2.1845e-05	-9.67069e-06	-5.92558e-06	-3.16515e-05	-3.71146e-06	-5.49913e-06	4.87955e-06	-2.9712e-06	1.4171e-05	1.36939e-05	1.98853e-08	-5.10272e-06	-9.44479e-06	-6.10047e-06	-6.78266e-06	1.01076e-05	-7.83008e-07	4.95449e-06	6.13918e-07	-2.14848e-05	2.31683e-05	1.73421e-05	-2.44968e-07	-6.38549e-06	4.1167e-06	2.71045e-06	-1.35574e-05	-9.4281e-06	-1.38815e-05	-1.03956e-05	2.47229e-05	8.55049e-06	4.52758e-06	-5.884e-06
-1.7886e-06	4.1854e-05	2.2987e-05	-1.88464e-05	-6.99185e-06	1.51504e-05	2.65883e-06	1.93557e-05	2.43382e-05	-1.53883e-05	5.68037e-06	1.51472e-05	-2.93129e-05	-5.23625e-06	-9.35209e-06	1.01325e-05	4.07036e-06	-2.37857e-05	-3.56181e-05	-2.25671e-05	-1.55024e-05	-3.65706e-06	1.69942e-05	5.3377e-06	-2.79189e-06	1.4229e-05	-3.81282e-06	1.32392e-05	1.75878e-05	-4.3392e-07	1.63776e-05	1.33428e-05	-3.20312e-06	1.97867e-05	-1.95512e-05	-1.75922e-05	1.74013e-05	-1.06785e-05	1.22316e-05	-4.69533e-06	9.905e-06	1.82311e-05	-1.66289e-05	1.62395e-05	9.45431e-06	8.27777e-07	-1.95006e-05	1.7811e-05	1.92747e-05	-2.32901e-06
-1.26058e-05	3.14497e-05	2.6658e-05	-3.80742e-07	-4.10689e-06	-2.02245e-05	1.52547e-05	-6.299e-07	-5.50206e-06	-2.76682e-07	-1.02335e-05	9.38237e-06	-7.45782e-06	-1.23323e-05	2.40294e-05	-1.5466e-05	-5.35057e-06	-7.72068e-06	-1.0797e-05	-5.91872e-06	-1.22906e-06	-1.85786e-05	1.40816e-05	-1.67788e-05	4.28264e-06	-7.14225e-06	8.45714e-06	1.99867e-05	1.41415e-05	8.62558e-06	-9.62539e-06	-1.32842e-05	-1.0293e-05	-1.0396e-06	-9.80099e-06	1.94293e-05	2.01806e-05	6.30148e-06	3.50863e-07	-1.81423e-05	-1.49841e-05	1.21798e-05	-2.1483e-05	-1.65877e-05	3.78898e-05	1.18941e-05	-3.01813e-06	-5.52843e-06	2.78794e-05	-3.79503e-06
1.60068e-05	2.59902e-05	2.01071e-05	-2.63763e-06	1.70194e-05	-2.86972e-05	7.25424e-06	-7.15794e-07	-1.00613e-05	1.10925e-05	1.76407e-06	-5.6401e-06	3.89455e-06	5.20506e-06	1.15326e-05	2.70144e-05	3.94157e-06	-5.68841e-06	1.26604e-05	6.45653e-06	-1.61041e-05	-2.98602e-06	1.85209e-05	2.506e-06	3.59816e-05	-3.11915e-05	1.83834e-06	7.24966e-06	-9.45081e-07	4.66141e-06	-6.19409e-06	-2.10179e-05	-2.47896e-05	1.37121e-05	-5.00258e-06	-4.9818e-06	-1.77634e-05	-1.9858e-05	7.65308e-06	4.02325e-06	7.93395e-06	2.40261e-05	-1.31906e-05	-7.41598e-06	1.03295e-06	-1.71821e-05	1.36038e-05	-1.08451e-05	1.85069e-05	-1.06227e-06
4.68376e-05	3.06991e-05	-2.66212e-06	-6.81213e-06	3.52726e-06	-3.50343e-05	1.4725e-05	1.57461e-05	-2.42284e-05	-8.66689e-06	-9.459e-06	-9.19591e-06	-2.48682e-05	3.49195e-06	2.80835e-05	1.33098e-05	-7.14886e-06	-1.17802e-05	-1.42114e-05	-4.78495e-06	-9.11413e-06	1.95759e-06	-2.16457e-06	2.82778e-05	2.69966e-05	-1.38692e-05	1.91764e-05	-3.58712e-06	6.19009e-06	1.27126e-05	-1.14506e-05	-6.6492e-06	2.11819e-05	2.01466e-05	-1.34145e-06	6.17748e-06	-6.95846e-06	-9.2898e-06	-6.18851e-06	1.56832e-06	1.52605e-06	2.46277e-05	1.51421e-06	2.44642e-05	1.70003e-05	-3.68493e-06	-2.71336e-05	1.85667e-05	4.39493e-05	-2.03866e-05
-1.22866e-05	4.29034e-05	-1.81173e-05	-7.38737e-06	1.04896e-05	-3.66797e-05	1.48127e-05	-9.31089e-06	-1.08927e-05	1.77658e-05	1.25205e-05	-4.09937e-07	2.74663e-06	7.68861e-06	1.45979e-05	5.73719e-06	7.87454e-07	-5.5139e-05	-2.73697e-06	5.25719e-06	-1.45442e-05	2.54395e-06	-9.56751e-06	1.39952e-05	-3.89979e-06	1.27173e-05	4.50351e-06	-1.28096e-05	-1.55564e-05	5.6374e-06	1.45896e-05	-2.04779e-05	-9.12601e-06	1.24909e-05	5.10435e-06	8.74169e-06	1.70045e-05	-2.38198e-06	5.06913e-06	-1.42538e-05	2.58649e-05	-8.12037e-06	-2.44841e-05	-1.20203e-06	1.94155e-05	1.21974e-05	3.563e-06	1.87041e-05	-1.0372e-05	-5.47271e-06
2.21511e-05	2.10257e-05	-1.51271e-05	-5.07182e-05	6.7604e-06	-4.43218e-05	1.93524e-06	6.04556e-06	-1.21661e-05	-7.57363e-06	-6.20688e-06	4.48041e-06	-1.49688e-05	-1.23023e-05	3.80514e-06	1.15952e-05	-1.20632e-05	-5.49156e-07	-2.35435e-05	-1.35632e-05	-3.53447e-06	5.64931e-06	3.44169e-07	2.29377e-05	4.99098e-06	8.76578e-06	-1.88341e-05	-2.98326e-05	-1.40821e-05	-9.92311e-06	-8.74233e-06	-2.76542e-05	-4.64901e-06	1.79237e-05	-1.61732e-05	-1.27917e-05	-1.10701e-05	9.17076e-06	-5.46768e-06	-1.73279e-05	-1.28936e-06	6.46518e-06	-2.40509e-05	-2.60326e-05	-1.75924e-05	3.51137e-05	-1.13712e-05	1.28374e-05	-1.10011e-07	2.01116e-05
1.29505e-05	3.27598e-05	-1.58605e-05	-1.75795e-05	3.56749e-06	-8.6473e-06	-2.34494e-05	-4.79465e-06	-5.27861e-06	1.80643e-05	-1.18242e-05	-9.0346e-07	-4.54623e-06	-4.90602e-05	-1.27767e-05	2.45525e-05	-4.67308e-06	-1.0425e-06	-1.5447e-05	2.10213e-05	-3.41297e-05	4.61812e-06	-2.40484e-05	7.20123e-06	-3.63378e-06	2.0224e-05	5.25834e-06	-2.18163e-05	-6.22258e-06	-1.43974e-05	8.62815e-06	-1.25936e-05	-6.81694e-06	1.35535e-05	1.51387e-05	-2.95896e-05	-8.14838e-06	-1.24354e-05	8.02104e-06	-6.87178e-06	3.82048e-06	-1.81867e-06	9.82256e-06	-1.59016e-05	2.90405e-07	-2.01401e-06	4.13786e-05	-5.55416e-06	1.81144e-05	4.07186e-05
1.18509e-05	1.78515e-05	9.97393e-06	3.786e-06	1.47017e-05	-2.48802e-05	1.97839e-05	1.13942e-05	-7.43403e-06	-8.38973e-06	8.37002e-06	5.51094e-06	-6.31394e-06	3.70544e-06	2.71665e-05	-6.24901e-06	-8.47744e-06	-1.2596e-05	-8.99408e-06	2.58843e-06	4.63398e-06	-9.15364e-06	-6.22783e-06	-7.24627e-06	1.17538e-05	-1.25684e-06	9.65906e-06	1.86691e-05	-1.49377e-05	2.42504e-05	-7.85909e-06	-7.23131e-07	4.84722e-07	2.77438e-05	1.01673e-05	-2.08124e-06	1.28468e-05	6.93411e-07	-9.16267e-06	7.06054e-06	8.87526e-06	-1.14105e-05	2.58957e-05	7.7511e-06	5.33942e-07	1.15363e-05	2.4194e-05	-2.08176e-05	2.01654e-05	1.60886e-05
-2.22799e-05	4.81272e-06	5.22527e-06	-3.23822e-06	1.63294e-05	-4.31233e-05	4.43346e-07	-7.18025e-06	-6.63989e-06	-2.75154e-05	2.17308e-05	2.83526e-05	-2.82377e-06	1.86496e-05	5.17052e-06	1.62231e-05	7.46972e-06	-2.74974e-05	-3.12228e-05	2.7475e-05	7.51096e-06	-5.06806e-06	-2.61974e-05	2.94849e-05	3.28836e-05	-1.13115e-05	2.72878e-05	-1.44015e-05	1.63994e-05	-1.97026e-07	-9.0107e-06	-1.50687e-05	-5.7318e-06	1.60647e-05	-2.34535e-06	-3.96972e-05	-7.64291e-06	2.39376e-05	-7.03798e-06	4.81574e-07	-1.6157e-05	2.44049e-05	-1.56291e-05	1.57446e-05	5.19326e-06	1.89726e-06	-8.45959e-06	2.06318e-06	1.60332e-05	-4.33529e-06
7.23857e-06	-7.96763e-06	1.06864e-05	-9.16282e-06	3.48412e-05	-6.50239e-06	2.41737e-05	1.07292e-05	-6.27891e-06	-9.47661e-06	-5.04495e-07	7.19872e-06	-3.17472e-05	4.90652e-06	-3.30156e-06	8.3607e-06	-5.72787e-06	-1.75727e-05	-1.53924e-05	1.85348e-05	1.47135e-05	-9.47884e-06	1.50786e-05	7.88915e-06	3.12195e-05	3.78833e-05	-2.09535e-05	-1.51481e-05	1.41093e-05	9.43368e-06	1.1259e-05	-5.19997e-06	-9.28001e-06	-2.1657e-06	-1.44972e-05	4.98751e-06	6.16912e-06	2.45354e-06	2.05301e-05	-2.20676e-06	1.38779e-05	-1.65777e-06	2.47608e-06	1.42305e-05	5.24617e-06	5.36954e-06	3.59283e-06	-2.61445e-05	1.48361e-05	-1.49234e-05
5.23293e-06	1.83569e-05	2.30767e-05	1.95324e-05	-8.05548e-06	-2.77404e-05	-9.5775e-06	-9.77079e-06	-1.34961e-05	1.06588e-05	9.01847e-06	1.01218e-05	5.015e-06	7.20118e-06	4.52389e-07	1.02673e-05	-5.90548e-06	-7.2532e-07	1.70095e-06	-5.23206e-06	-4.57626e-06	-5.83384e-06	1.67974e-06	-3.27771e-07	2.63635e-05	8.93192e-07	1.69158e-05	-6.41194e-06	-1.1221e-05	-1.68597e-06	7.55207e-06	8.43821e-06	3.70105e-06	1.62993e-05	-1.56802e-05	-7.33907e-06	7.00443e-07	-1.59192e-05	1.04365e-05	-1.83171e-05	1.30426e-05	-2.60828e-06	9.41113e-06	-3.79611e-06	4.69921e-05	1.45938e-05	8.71379e-06	5.17569e-06	-1.31396e-05	-9.78596e-06
-2.90528e-05	2.28855e-05	1.61744e-05	1.68503e-05	-2.26958e-06	-3.0479e-05	-1.2015e-05	1.87718e-05	1.6122e-05	1.49615e-05	1.17379e-06	-1.29886e-05	-1.48503e-05	-9.67602e-07	-2.83369e-07	-5.60425e-07	1.96902e-05	1.97059e-05	-8.32456e-06	-1.00445e-05	-2.2922e-06	8.25419e-06	-1.66343e-05	6.2237e-06	-2.86161e-06	-8.86057e-06	6.25399e-06	-6.89505e-06	-1.78946e-05	3.05575e-06	1.28178e-05	2.07998e-05	3.26479e-05	-8.3098e-07	6.55267e-07	-2.4023e-05	4.12808e-05	7.8521e-06	-9.31253e-07	-1.88312e-05	1.4493e-05	2.46781e-05	2.63477e-06	3.34567e-07	3.52464e-06	9.2138e-06	-3.38376e-06	-3.34035e-05	-4.57292e-06	-1.46344e-05
1.76662e-05	3.41453e-05	1.82512e-05	-7.78788e-06	4.2983e-06	-2.773e-05	1.48129e-06	9.68968e-06	8.92276e-08	1.09725e-05	9.85587e-06	-6.73798e-06	1.84637e-05	2.25322e-06	-3.21157e-06	1.6471e-05	1.96988e-05	3.47985e-05	-6.22554e-06	5.23163e-06	-1.93088e-05	1.17513e-05	-3.13911e-05	1.00518e-05	-6.72871e-06	-3.81108e-06	2.64546e-05	-9.31718e-06	9.25482e-06	-1.65012e-06	1.14212e-05	2.26098e-07	3.05017e-05	3.2246e-06	-1.12435e-06	1.20913e-05	-7.97501e-06	-9.78962e-06	2.34931e-06	2.03505e-05	3.80404e-06	7.48863e-06	5.05441e-06	-2.63431e-06	-2.82363e-05	-9.87946e-06	8.40866e-06	-4.46077e-06	5.5765e-06	-4.9689e-07
1.21514e-05	2.60877e-05	2.53905e-05	1.09559e-06	2.78667e-05	-1.5608e-05	-1.0238e-06	2.72952e-07	-3.79036e-05	4.03798e-06	-1.33625e-05	1.24884e-05	1.94625e-06	1.91684e-06	2.4461e-06	-1.59816e-06	-1.5584e-05	-1.30329e-05	5.41673e-06	4.91277e-06	8.17898e-06	-1.714e-05	-1.5725e-06	2.48491e-06	2.17252e-05	-2.37579e-05	3.82988e-06	-8.25003e-06	1.75301e-05	2.61051e-05	-3.41635e-06	1.28893e-06	1.14118e-05	1.11266e-05	-3.33015e-05	-3.874e-06	8.36693e-06	1.08114e-06	1.34792e-05	4.60471e-06	7.31901e-06	-2.44714e-05	2.88947e-06	2.06418e-06	-5.64595e-06	6.81906e-06	-1.59771e-05	2.52056e-05	1.889e-05	2.31102e-05
1.08878e-07	1.6617e-05	1.14463e-05	-8.84608e-06	1.64667e-05	-1.12156e-05	-5.07439e-06	-3.63057e-06	-2.38694e-05	1.64077e-06	9.71424e-06	-4.42408e-06	-2.00199e-05	-8.30217e-07	-9.05588e-06	1.62197e-05	-8.56988e-06	-1.19753e-05	6.67672e-07	1.57093e-05	6.12484e-06	-5.56274e-06	-9.24436e-06	1.25465e-05	-1.65966e-06	-2.49058e-06	9.28604e-06	-8.97657e-06	-2.46144e-05	1.75723e-05	1.15618e-06	2.03442e-06	2.94161e-05	-1.14398e-06	-2.05663e-05	9.26252e-06	-5.48646e-06	1.46732e-05	-2.60835e-06	-1.70051e-06	2.56497e-06	-5.013e-07	1.17233e-05	1.05409e-05	2.76469e-05	4.63542e-06	-1.34268e-05	7.73371e-06	-1.03954e-05	1.41089e-05
-9.6841e-06	-2.24543e-07	3.18111e-05	-7.49093e-06	2.06695e-05	-6.12336e-06	-9.98827e-06	1.29447e-05	-5.69425e-06	3.04161e-05	6.90529e-06	-1.80941e-05	-4.36976e-06	1.66764e-05	2.57896e-05	3.14049e-05	-3.7757e-07	-9.91291e-06	1.92711e-05	1.05652e-05	-1.38205e-05	2.2067e-05	1.24511e-05	1.84821e-06	1.91008e-05	3.01241e-05	-5.96634e-06	-8.11297e-07	-2.02924e-06	2.33642e-05	-9.01377e-07	-4.15817e-06	-7.26275e-06	1.32628e-05	2.28126e-06	-1.22481e-05	5.90741e-06	-1.07837e-05	-2.04404e-07	-1.04846e-05	4.91855e-06	-3.87331e-06	1.50851e-05	4.86276e-06	8.13986e-06	1.6904e-05	-1.82569e-05	-2.04382e-05	-1.02315e-05	1.31467e-05
2.24681e-07	1.80736e-05	2.11992e-05	1.20021e-05	-1.85029e-05	-3.84262e-06	-1.25748e-05	7.90827e-06	2.20123e-05	-8.73245e-06	-6.95758e-06	-2.16856e-05	-1.33026e-05	-2.39797e-06	-1.70171e-05	-8.21311e-06	1.29319e-05	1.40393e-05	1.0289e-05	9.49917e-06	1.69555e-05	-8.13711e-06	-2.00923e-05	1.02455e-05	2.5577e-05	8.20396e-06	-4.18539e-06	-7.04712e-06	1.85556e-06	3.07231e-05	-7.53443e-06	1.43425e-05	-4.66341e-06	1.22751e-05	3.85057e-05	-2.75187e-06	2.67738e-05	-2.39919e-06	1.3116e-05	-1.01489e-05	1.12379e-06	1.72652e-05	-1.02761e-06	-2.06394e-06	5.56107e-06	2.87372e-06	-8.94995e-06	2.00037e-05	1.59738e-05	2.56889e-05
-1.32896e-06	2.54168e-05	3.22418e-05	-8.41442e-06	-5.7409e-06	-4.4133e-05	2.16128e-05	-6.38558e-06	-2.13308e-05	1.08333e-05	6.0201e-06	-6.42205e-06	4.45244e-06	-8.15657e-06	-1.07709e-05	-1.13213e-05	1.91189e-05	-2.71909e-05	-3.183e-05	-6.11643e-06	1.4532e-05	4.2163e-06	-9.42069e-06	7.67096e-06	2.74657e-05	6.08615e-06	-7.86814e-06	-6.90657e-06	-9.65487e-06	2.24077e-06	-1.11233e-05	-2.42756e-07	-1.98496e-05	3.81607e-05	-7.23151e-06	1.55825e-06	-1.50642e-05	-1.66636e-05	-7.02898e-07	-8.88191e-06	6.39864e-06	2.25391e-05	4.38234e-06	4.06679e-06	2.01957e-05	-9.76197e-06	-1.58396e-05	-6.55638e-06	1.82482e-05	8.34259e-06
[truncated: 58 more columns]

## Sheet: q (Fig 2a)
0.959799
0.991498
1.02319
1.05488
1.08656
1.11823
1.1499
1.18156
1.21321
1.24486
1.2765
1.30813
1.33975
1.37136
1.40297
1.43457
1.46616
1.49774
1.52931
1.56087
1.59242
1.62397
1.6555
1.68702
1.71854
1.75004
1.78153
1.81301
1.84448
1.87594
1.90739
1.93883
1.97025
2.00166
2.03306
2.06445
2.09583
2.12719
2.15854
2.18988
2.2212
2.25251
2.28381
2.31509
2.34636
2.37762
2.40886
2.44008
2.4713
2.50249
2.53367
2.56484
2.59599
2.62712
2.65824
2.68935
2.72043
2.7515
2.78256
2.81359
2.84461
2.87562
2.9066
2.93757
2.96852
2.99945
3.03036
3.06126
3.09214
3.123
3.15383
3.18466
3.21546
3.24624
3.277
3.30774
3.33846
3.36917
3.39985
3.43051
3.46115
3.49177
3.52237
3.55294
3.5835
3.61403
3.64455
3.67504
3.7055
3.73595
3.76637
3.79677
3.82715
3.8575
3.88783
3.91814
3.94843
3.97868
4.00892
4.03913
4.06932
4.09948
4.12962
4.15973
4.18982
4.21988
4.24992
4.27993
4.30991
4.33987
4.3698
4.39971
4.42959
4.45944
4.48927
4.51907
4.54884
4.57858
4.6083
4.63798
4.66764
4.69728
4.72688
4.75645
4.786
4.81552
4.84501
4.87446
4.90389
4.93329
4.96266
4.992
5.02131
5.05059
5.07984
5.10906
5.13824
5.1674
5.19652
5.22561
5.25468
5.28371
5.3127
5.34167
5.3706
5.3995
5.42837
5.4572
5.48601
5.51477
5.54351
5.57221
5.60088
5.62951
5.65811
5.68668
5.71521
5.74371
5.77217
5.80059
5.82899
5.85734
5.88566
5.91395
5.9422
5.97041
5.99859
6.02673
6.05483
6.0829
6.11093
6.13892
6.16688
6.1948
6.22268
6.25053
6.27833
6.3061
6.33383
6.36152
6.38917
6.41679
6.44436
6.4719
6.4994

## Sheet: q (Fig 3a)
1.52931
1.56087
1.59242
1.62397
1.6555
1.68702
1.71854
1.75004
1.78153
1.81301
1.84448
1.87594
1.90739
1.93883
1.97025
2.00166
2.03306
2.06445
2.09583
2.12719
2.15854
2.18988
2.2212
2.25251
2.28381
2.31509
2.34636
2.37762
2.40886
2.44008
2.4713
2.50249
2.53367
2.56484
2.59599
2.62712
2.65824
2.68935
2.72043
2.7515
2.78256
2.81359
2.84461
2.87562
2.9066
2.93757
2.96852
2.99945
3.03036
3.06126
3.09214
3.123
3.15383
3.18466
3.21546
3.24624
3.277
3.30774
3.33846
3.36917
3.39985
3.43051
3.46115
3.49177
3.52237
3.55294
3.5835
3.61403
3.64455
3.67504
3.7055
3.73595
3.76637
3.79677
3.82715
3.8575
3.88783
3.91814
3.94843
3.97868
4.00892
4.03913
4.06932
4.09948
4.12962
4.15973
4.18982
4.21988
4.24992
4.27993
4.30991
4.33987
4.3698
4.39971
4.42959
4.45944
4.48927
4.51907
4.54884
4.57858
4.6083
4.63798
4.66764
4.69728
4.72688
4.75645
4.786
4.81552
4.84501
4.87446
4.90389
4.93329
4.96266
4.992
5.02131
5.05059
5.07984
5.10906
5.13824
5.1674
5.19652
5.22561
5.25468
5.28371
5.3127
5.34167
5.3706
5.3995
5.42837
5.4572
5.48601
5.51477
5.54351
5.57221
5.60088
5.62951
5.65811
5.68668
5.71521
5.74371
5.77217
5.80059
5.82899
5.85734
5.88566
5.91395
5.9422
5.97041
5.99859
6.02673
6.05483
6.0829
6.11093
6.13892
6.16688
6.1948
6.22268
6.25053
6.27833
6.3061
6.33383
6.36152
6.38917
6.41679
6.44436
6.4719
6.4994

## Sheet: t
-0.375	-0.35	-0.325	-0.3	-0.275	-0.25	-0.225	-0.2	-0.175	-0.15	-0.125	-0.1	-0.075	-0.05	-0.025	0	0.025	0.05	0.075	0.1	0.125	0.15	0.175	0.2	0.225	0.25	0.275	0.3	0.325	0.35	0.375	0.4	0.425	0.45	0.475	0.5	0.525	0.55	0.575	0.6	0.625	0.65	0.675	0.7	0.725	0.75	0.775	0.8	0.825	0.85
[truncated: 58 more columns]
